# Supplementary material for: Catalyst-Free One-Pot Synthesis of Densely Substituted Pyrazole-Pyrazines as Anti-Colorectal Cancer Agents
Source: PubMed Central journal article supplement (PMC7283261; doi:10.1038/s41598-020-66137-z), 2020-06-09

## Supporting Information

### Catalyst-Free One-Pot Synthesis of Densely Substituted Pyrazole-Pyrazines as Anti-Colorectal Cancer Agents

Jia Xu<sup>1</sup>, Hong-Bo Tan<sup>1</sup>, Ya-Jun Zhang<sup>1</sup>, Dian-Yong Tang<sup>1</sup>, Frank F. Zhan,<sup>3</sup> Hong-yu Li,<sup>2,3\*</sup> Zhong-Zhu Chen<sup>1\*</sup> & Zhi-Gang Xu<sup>1\*</sup>

<sup>1</sup>College of Pharmacy, National & Local Joint Engineering Research Center of Targeted and Innovative Therapeutics, Chongqing Key Laboratory of Kinase Modulators as Innovative Medicine, Chongqing University of Arts and Sciences, Chongqing 402160, China.

<sup>2</sup>Department of Pharmaceutical Sciences, College of Pharmacy, University of Arkansas for Medical Sciences, Little Rock, AR 72205, USA.

<sup>3</sup>Winthrop P. Rockefeller Cancer Institute, University of Arkansas for Medical Sciences, Little Rock, AR 72205, USA.

\*email: HLi2@uams.edu; 18883138277@163.com; xzg@cqwu.edu.cn.

Compound 5a

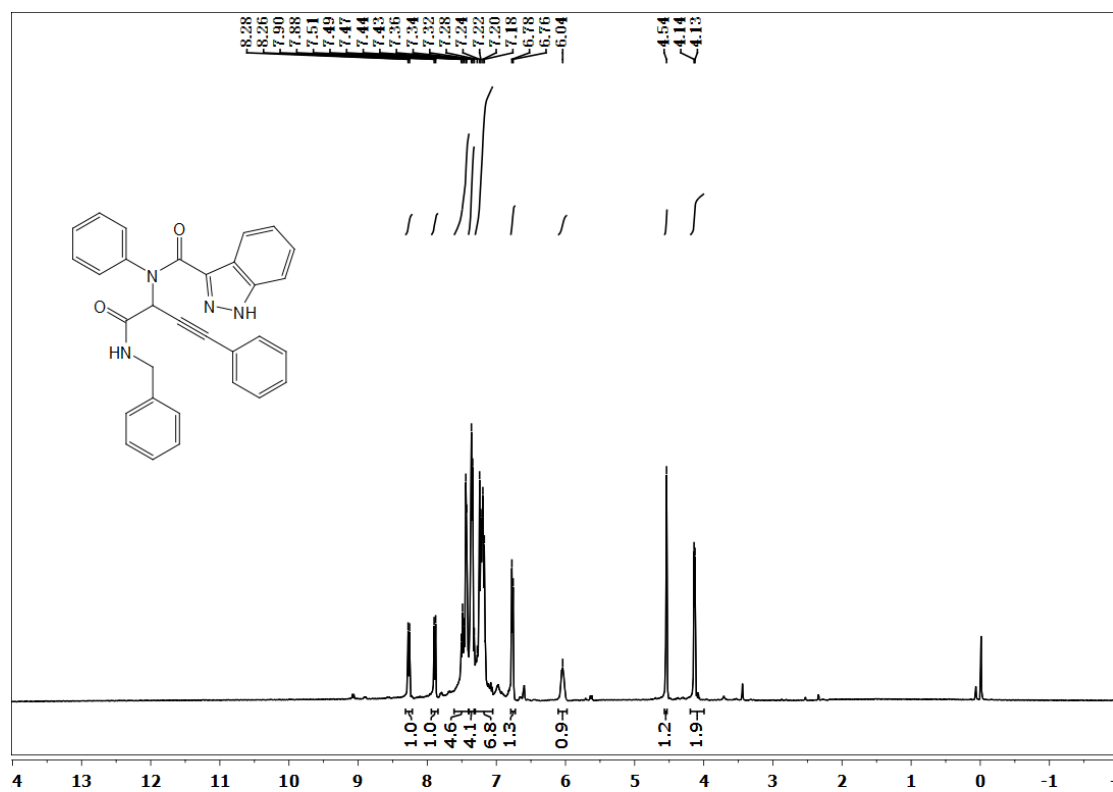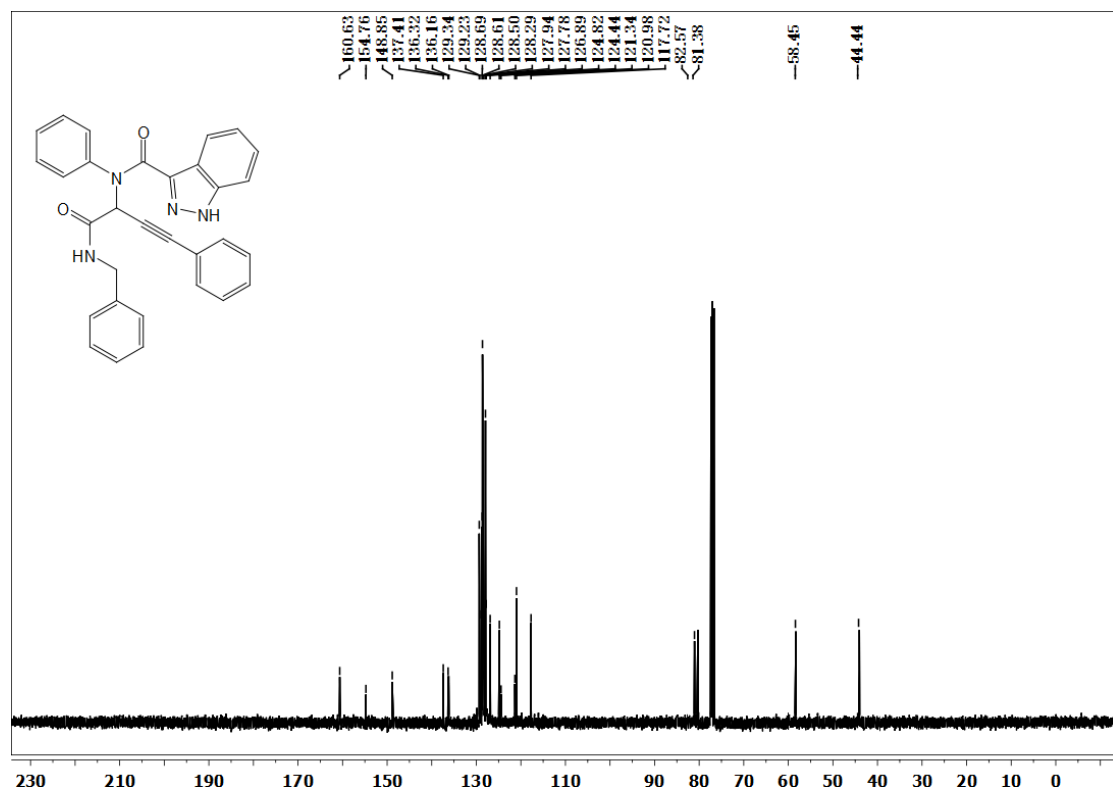

Compound **5b**

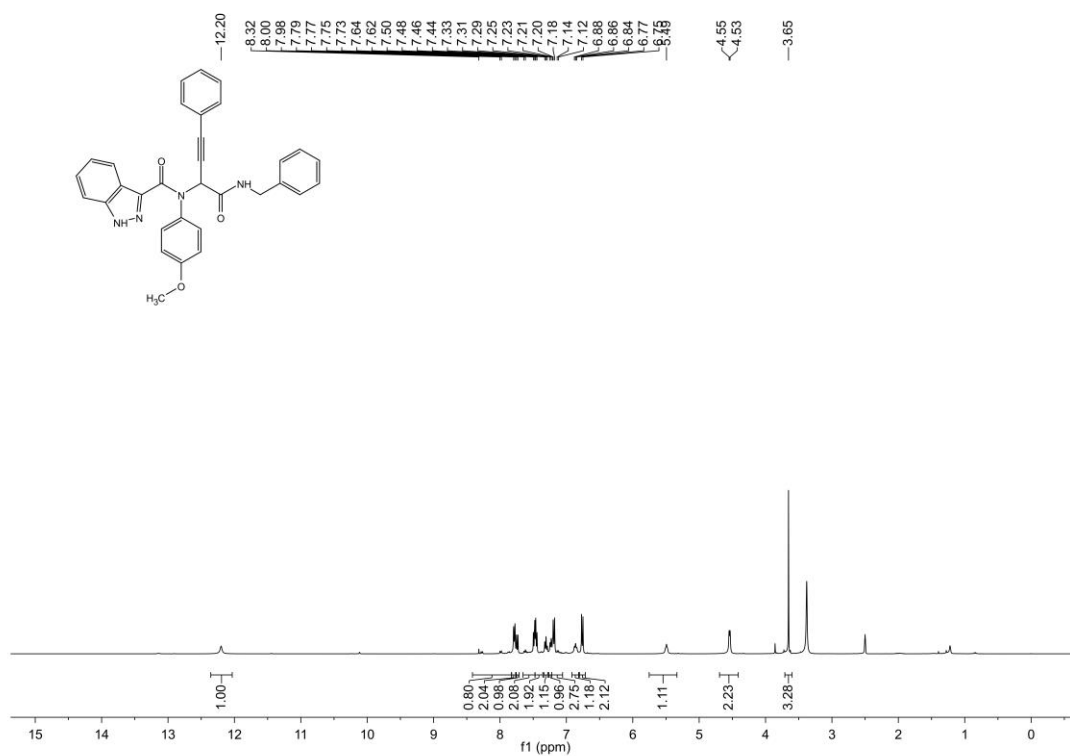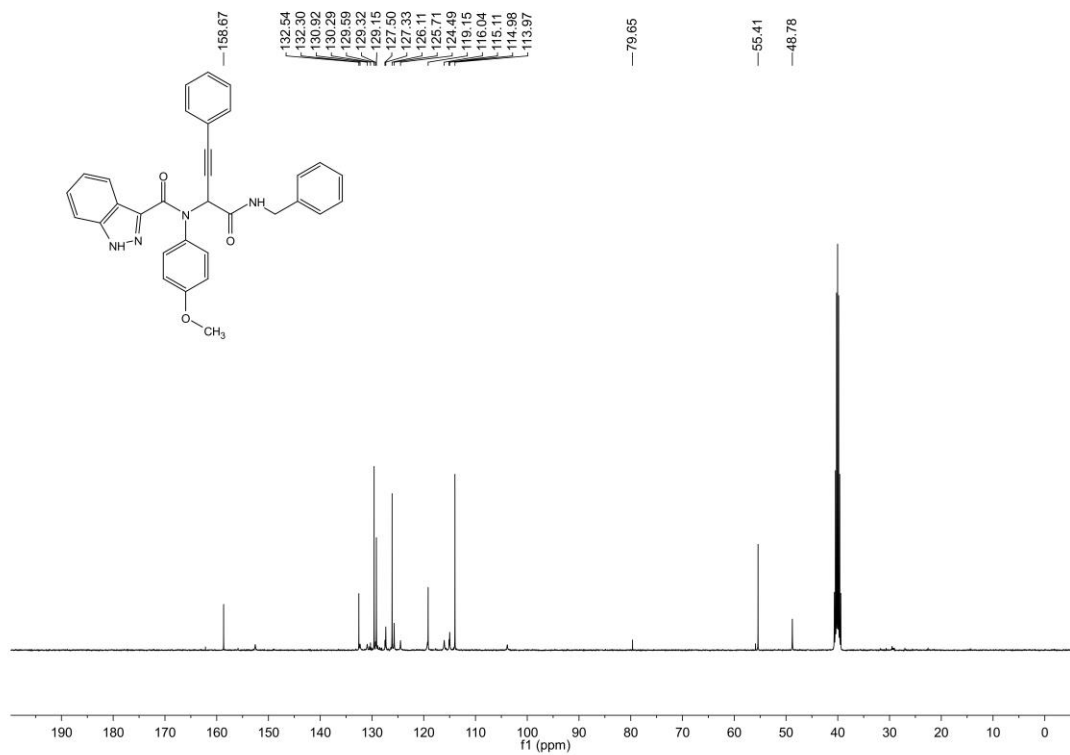

Compound **6a**

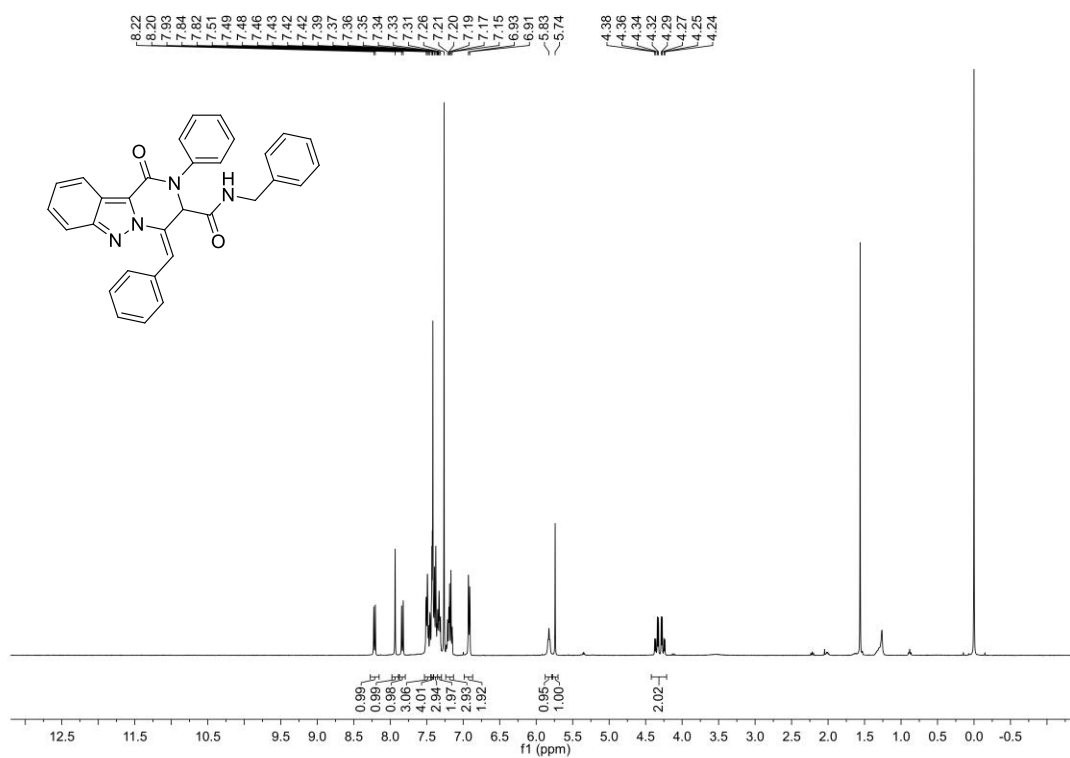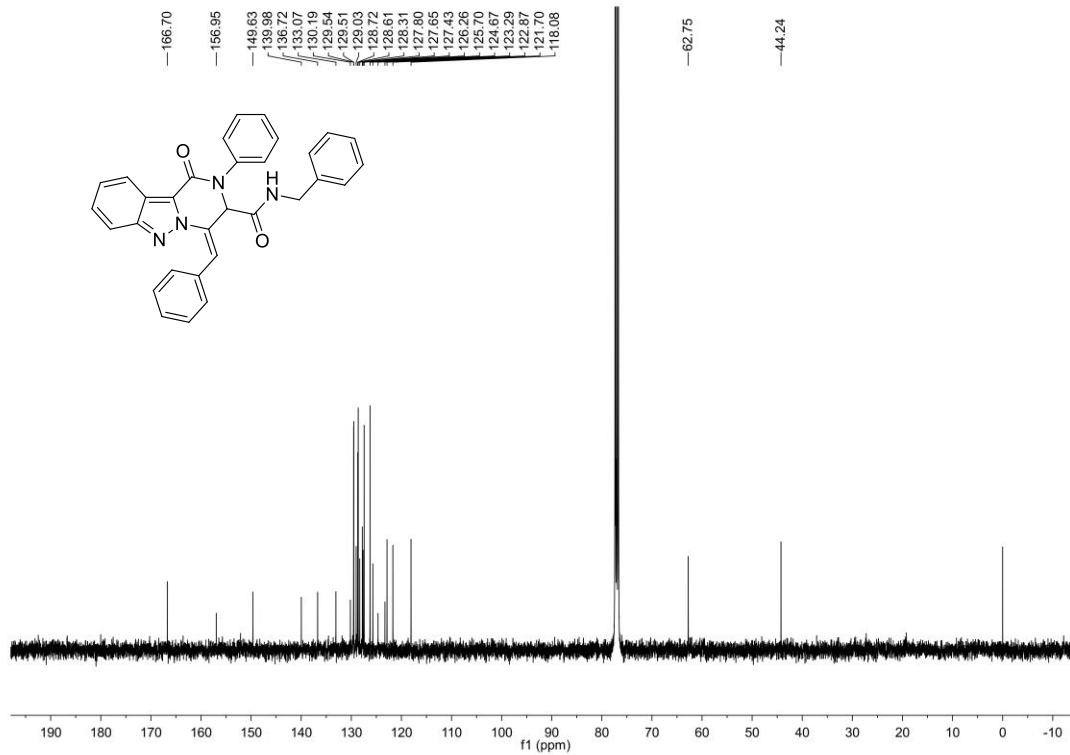

US-7a #971 RT: 6.30 AV: 1 NL: 2.39E7  
T: FTMS + p ESI Full lock ms [80.0000-1200.0000]

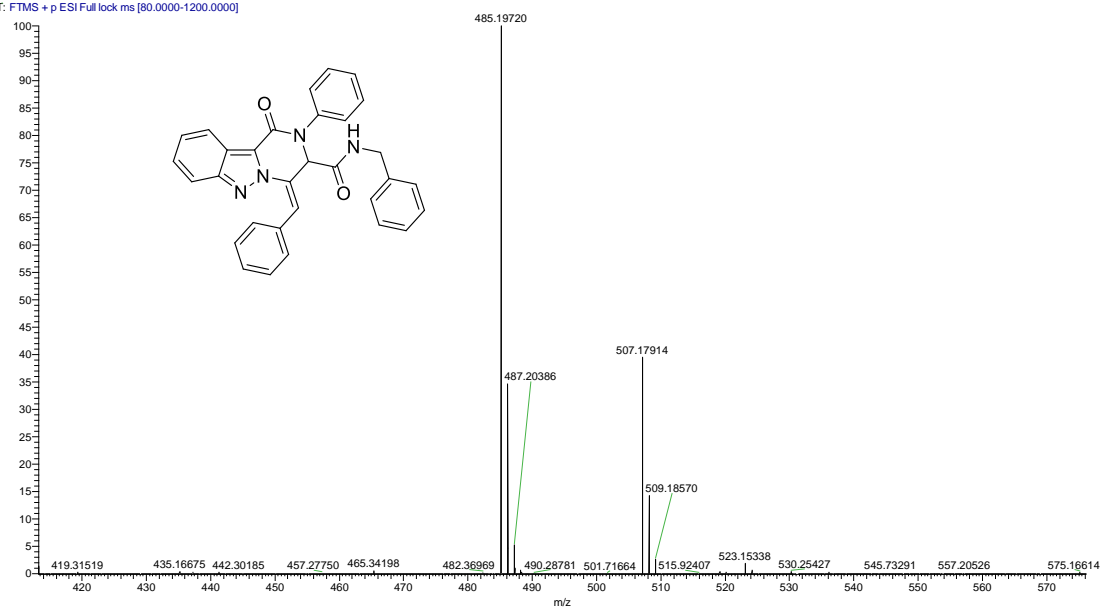

### Compound 7a

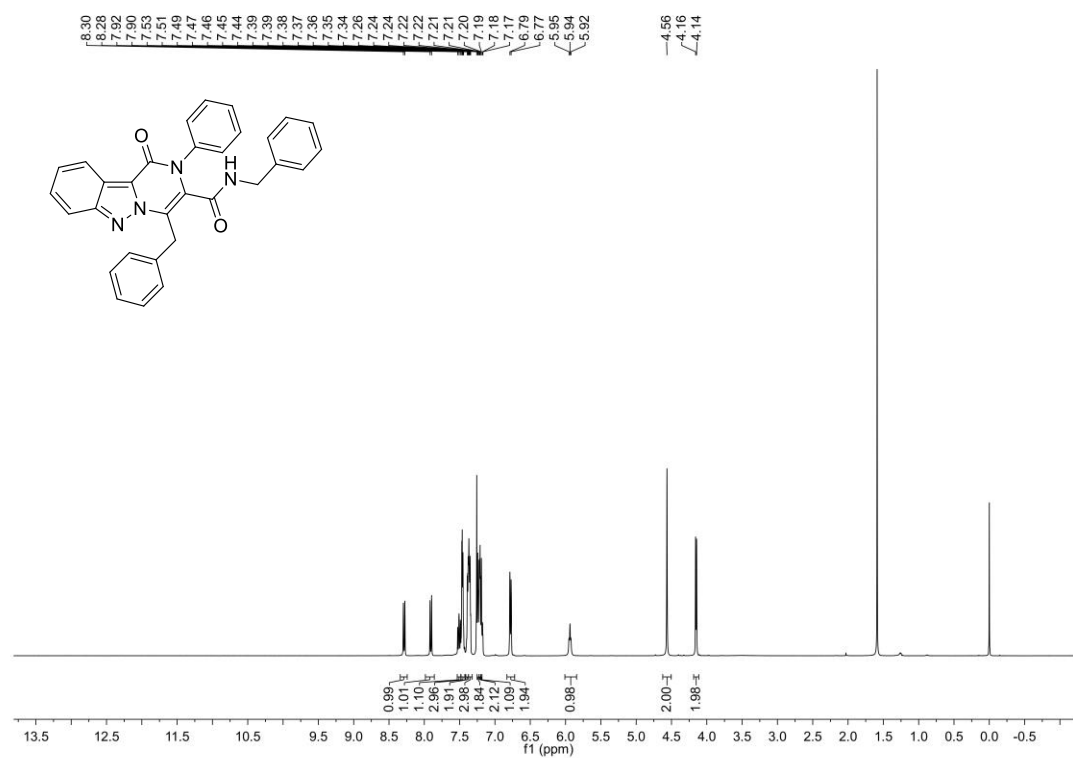

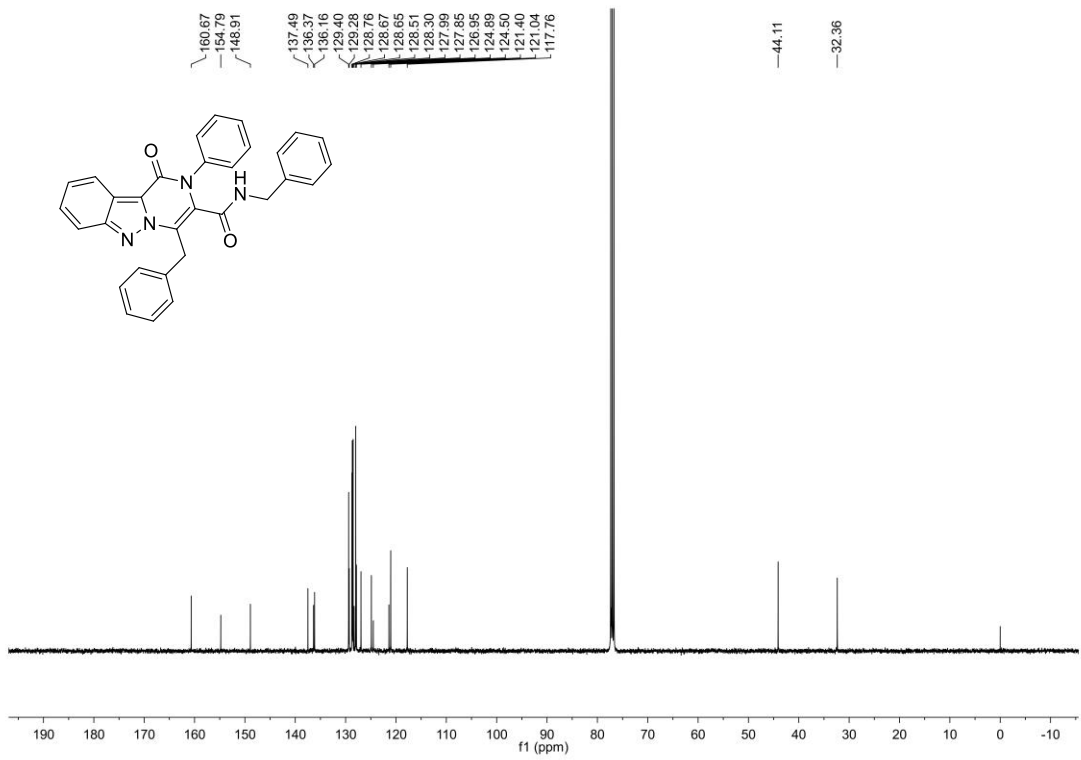

15-7a #974 RT: 6.32 AV: 1 NL: 8.96E7  
 T: FTMS + p ESI Full lock ms [80.0000-1200.0000]

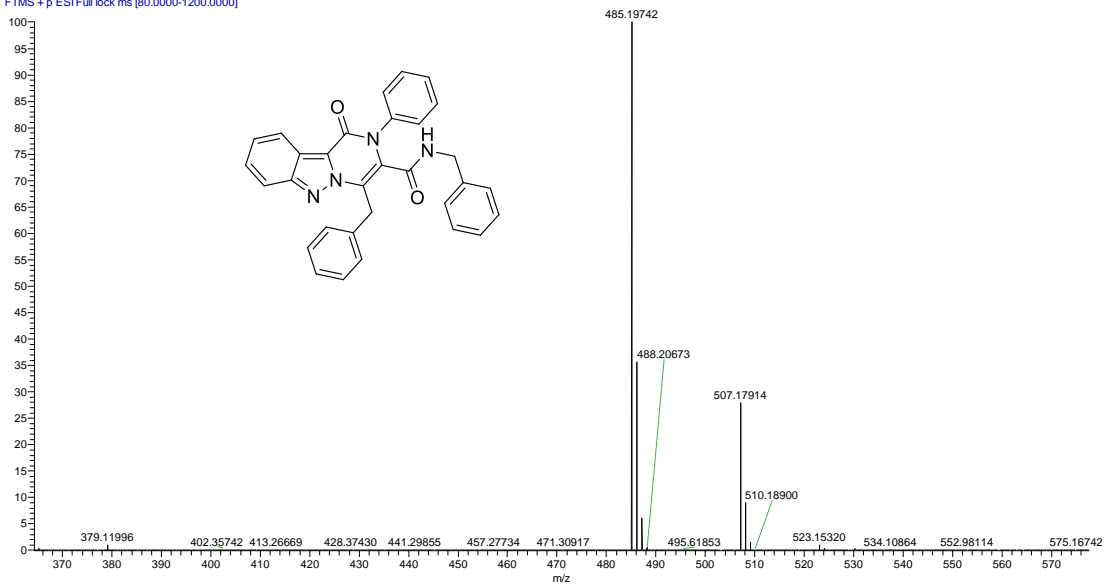

Compound 7b

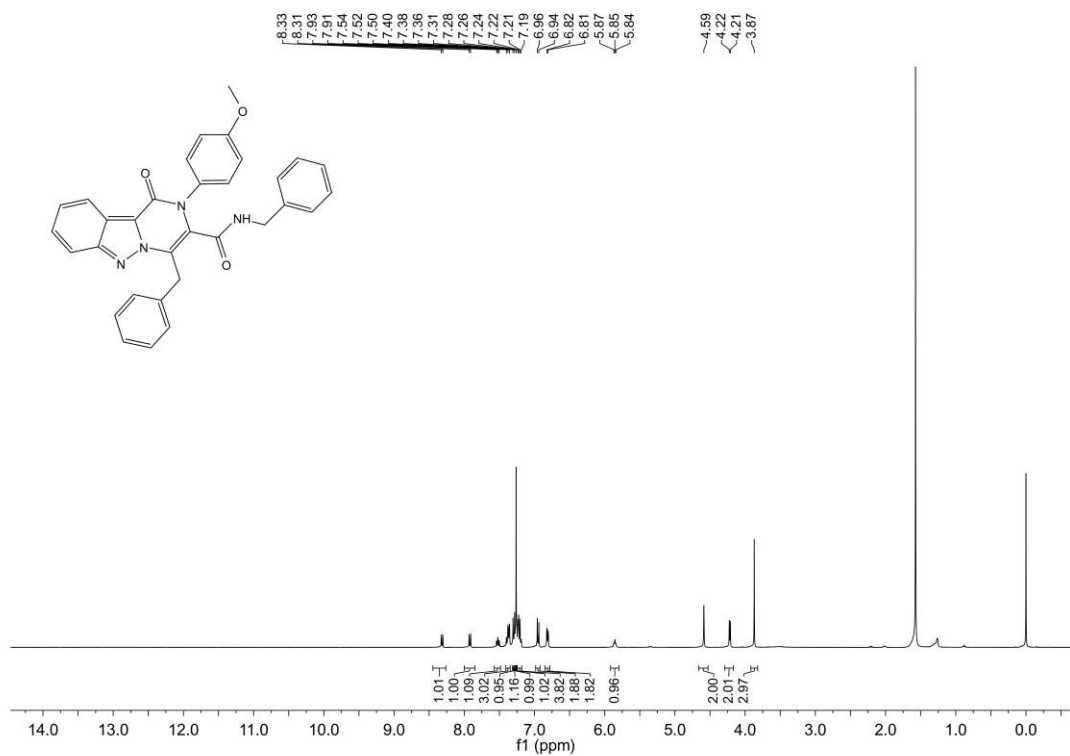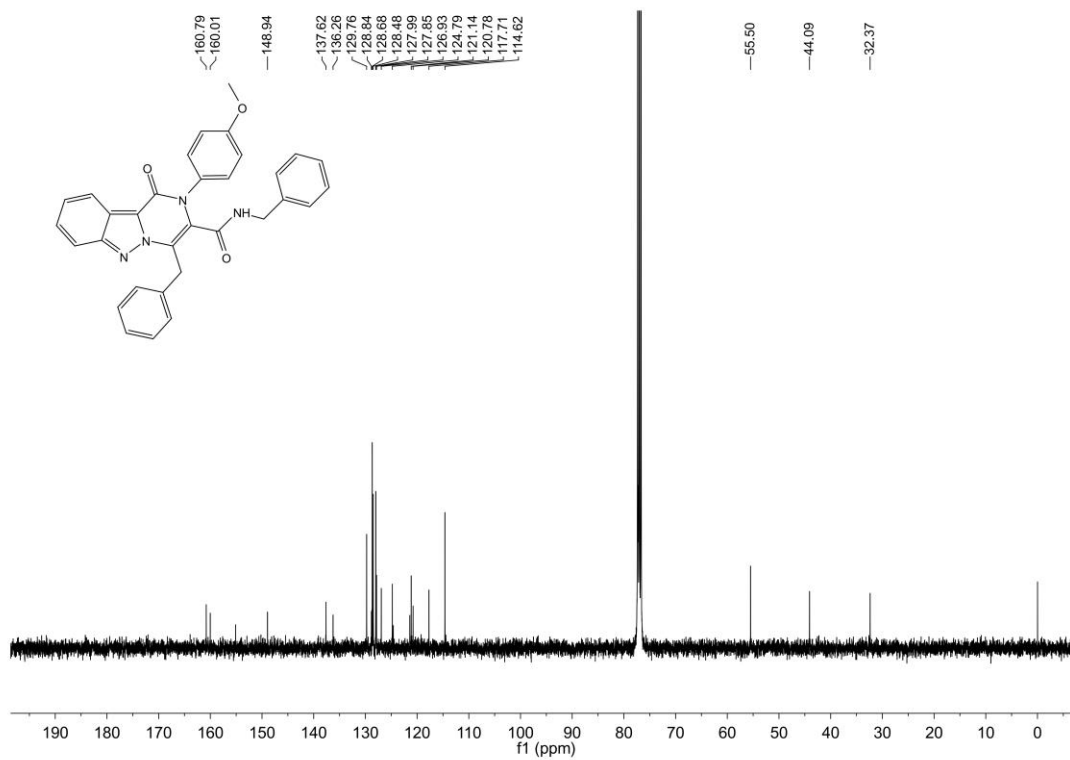

U5-7b #915 RT: 6.32 AV: 1 NL: 1.00E8  
T: FTMS + p ESI Full lock ms [80.0000-1200.0000]

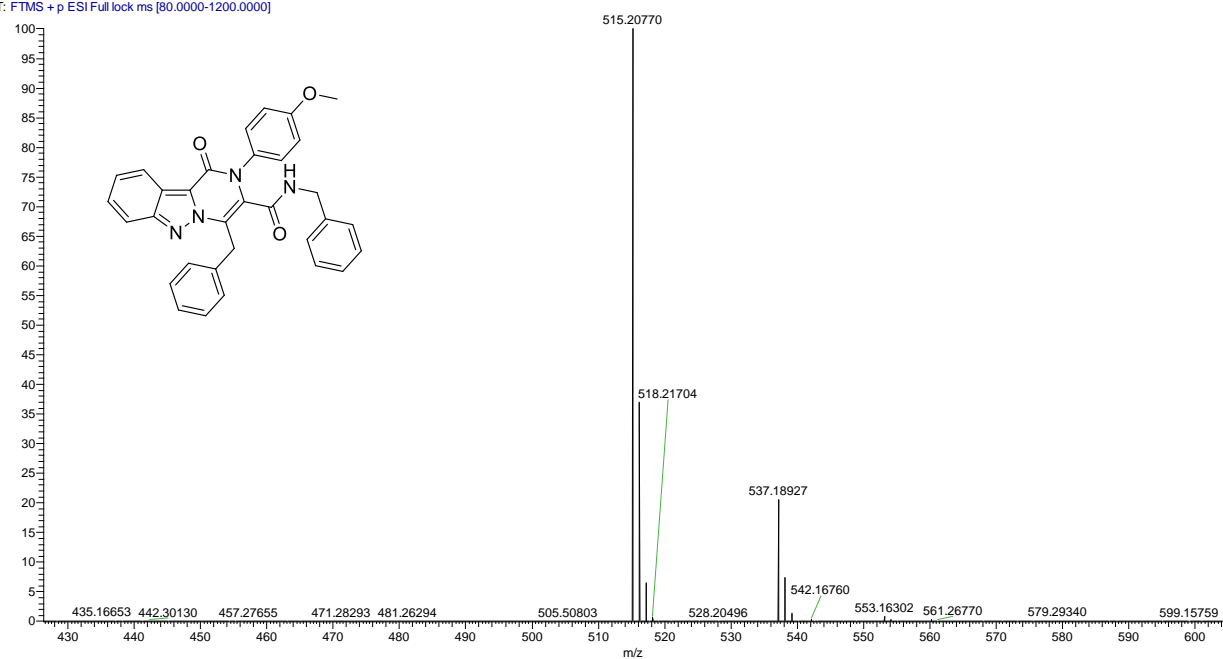

### Compound 7c

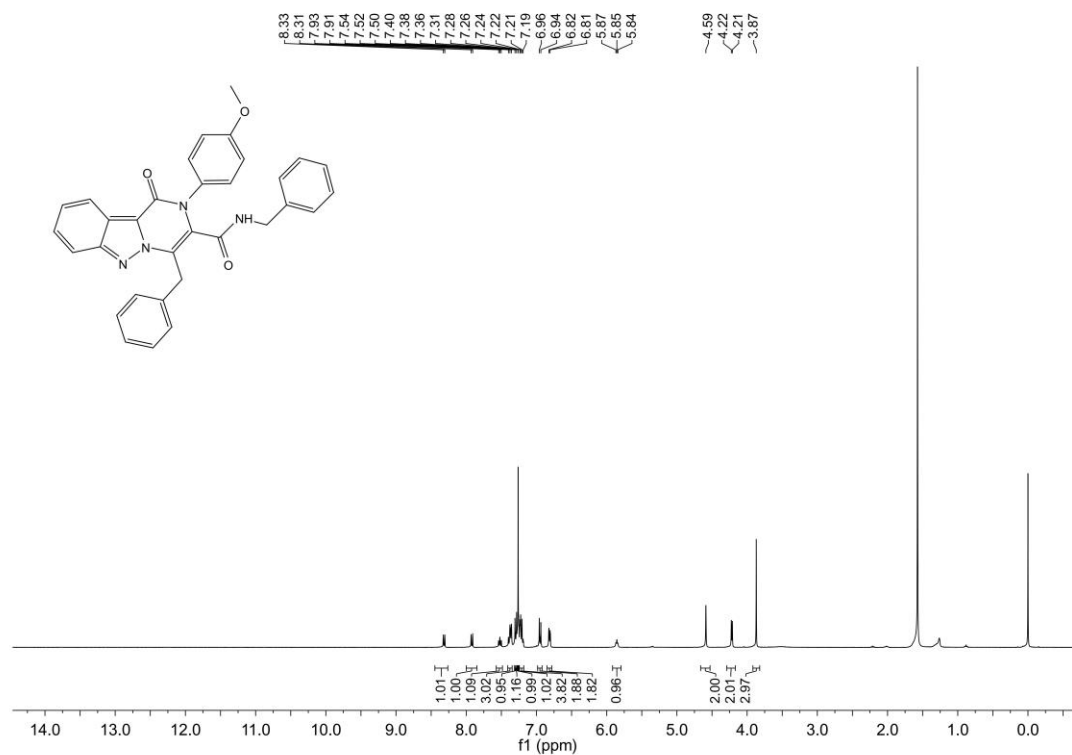



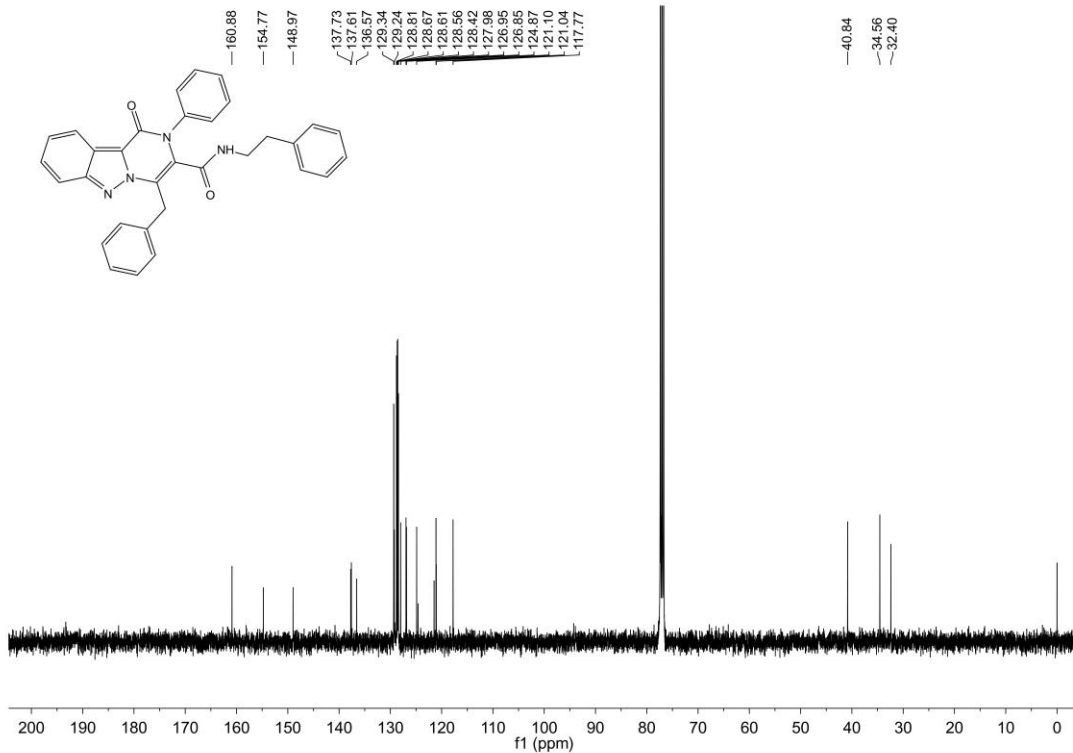

U5-7c #910 RT: 6.39 AV: 1 NL: 1.33E8  
 T: FTMS + p ESI Full lock ms [80.0000-1200.0000]

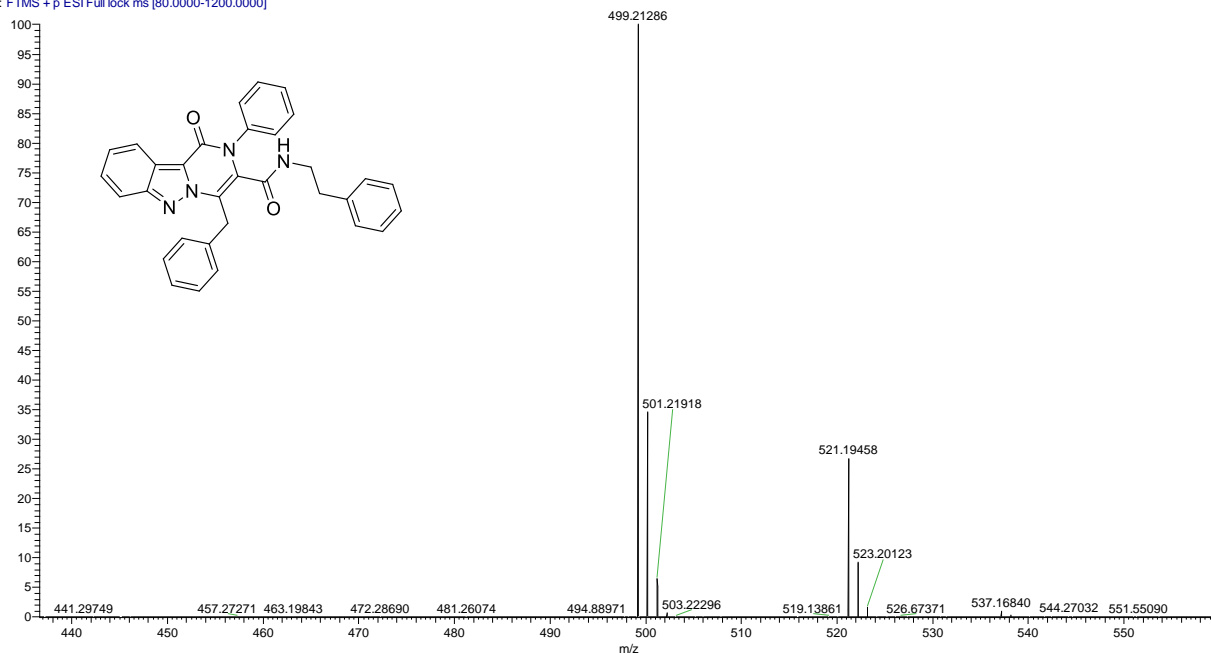

Compound **7d**

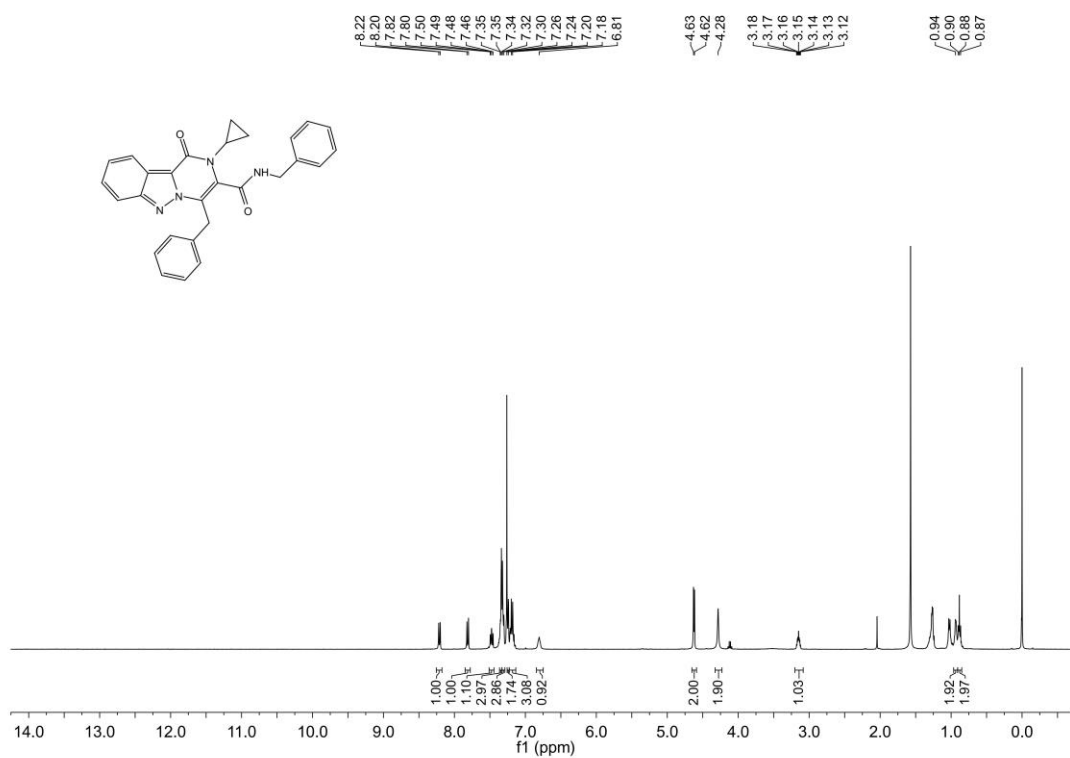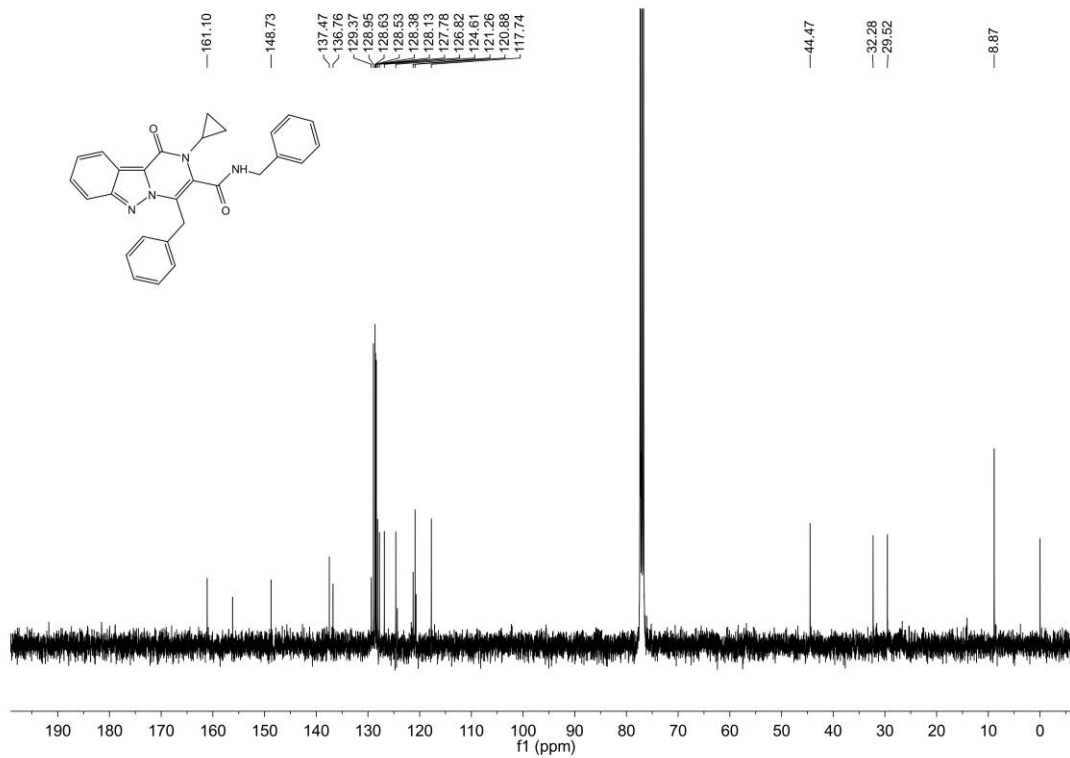

U5-7d #901 RT: 6.36 AV: 1 NL: 6.17E7  
 T: FTMS + p ESI Full lock ms [80.0000-1200.0000]

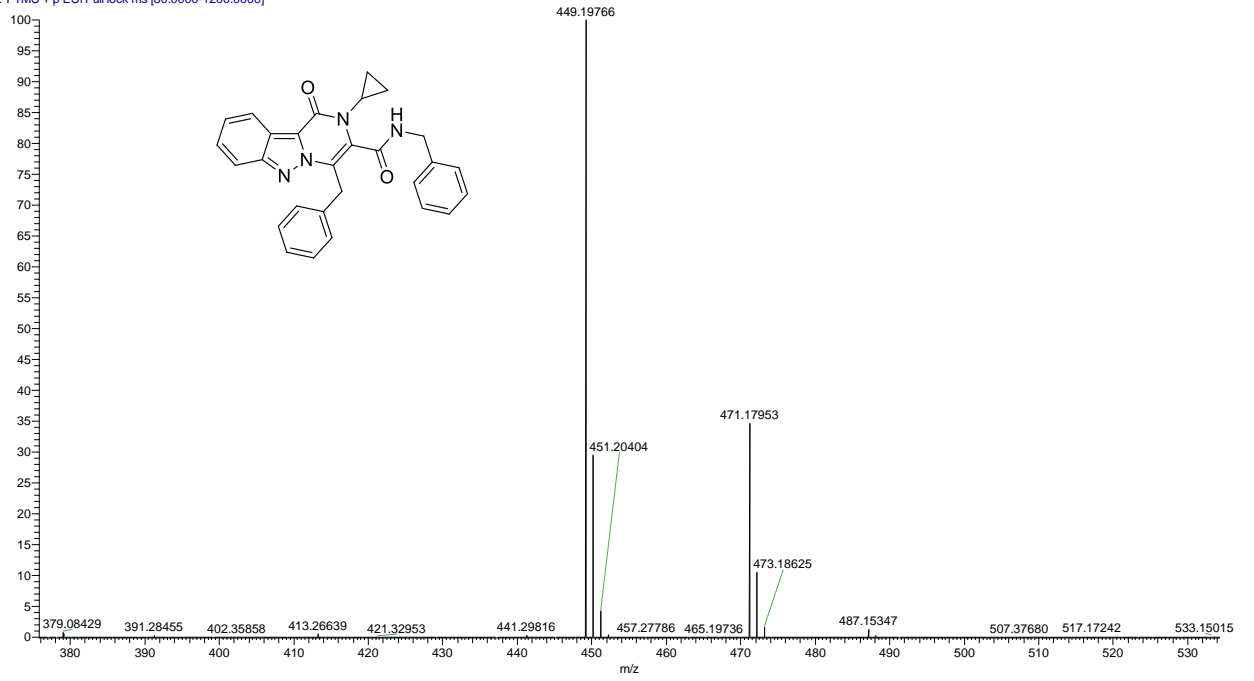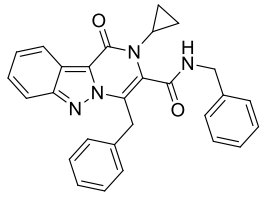

Compound 7e

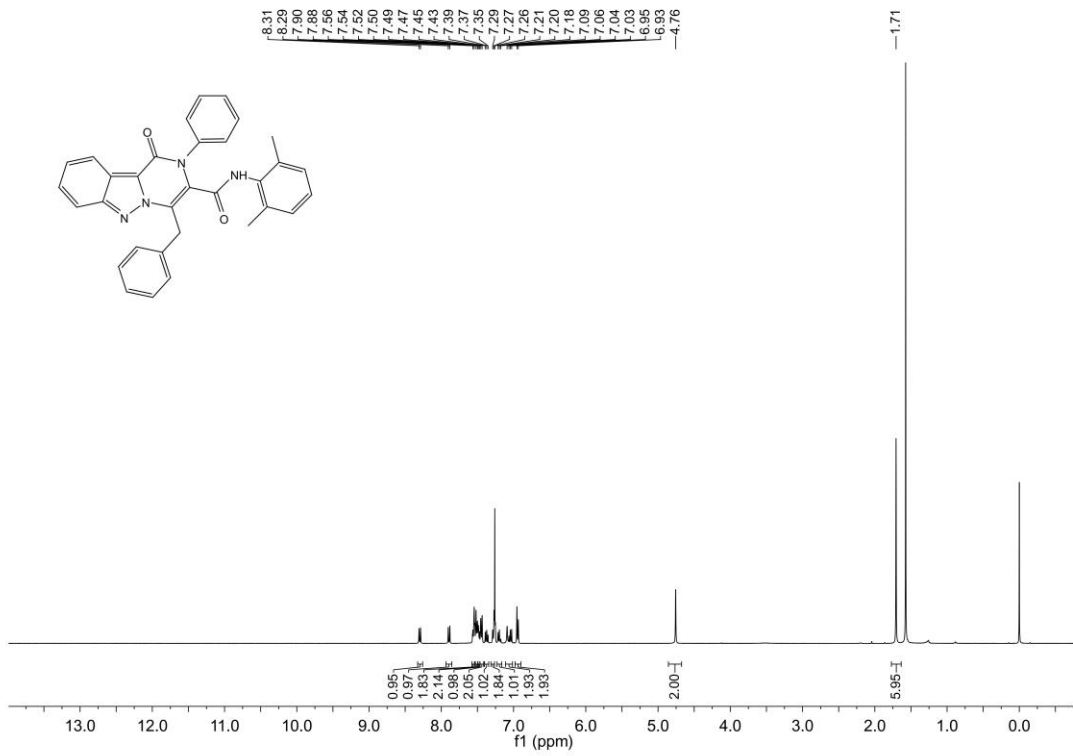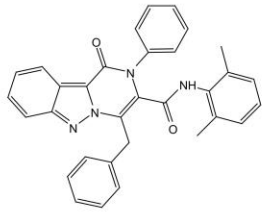

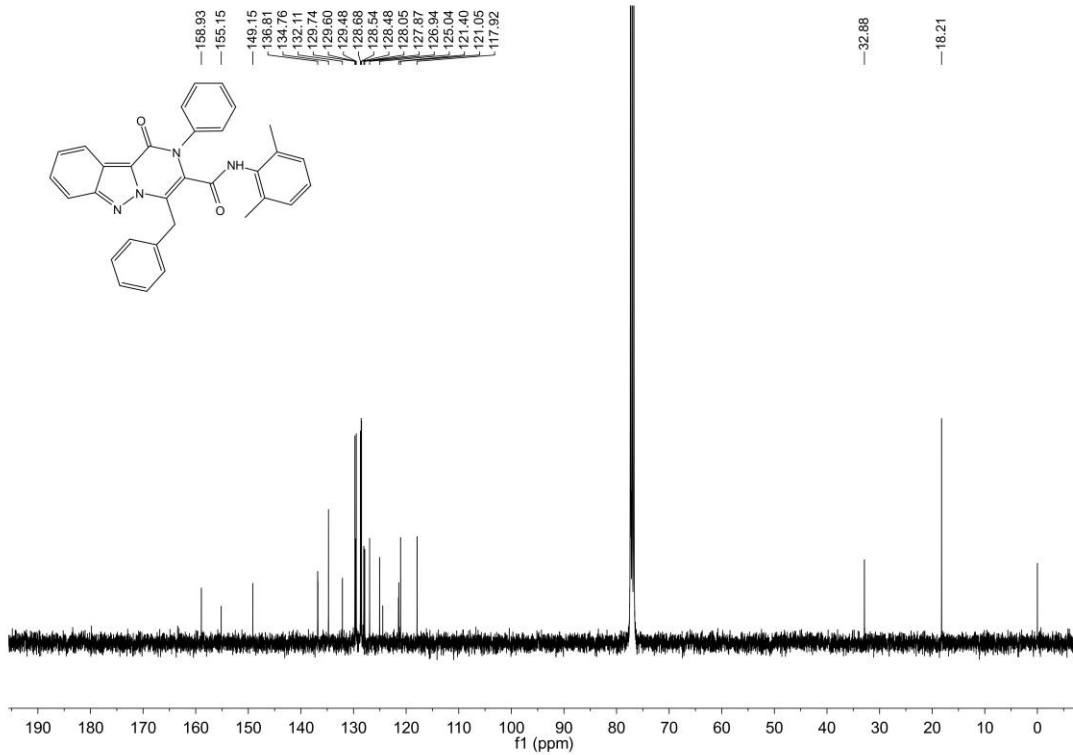

U5-7e #897 RT: 6.36 AV: 1 NL: 7.46E7  
 T: FTMS + p ESI Full lock ms [80.0000-1200.0000]

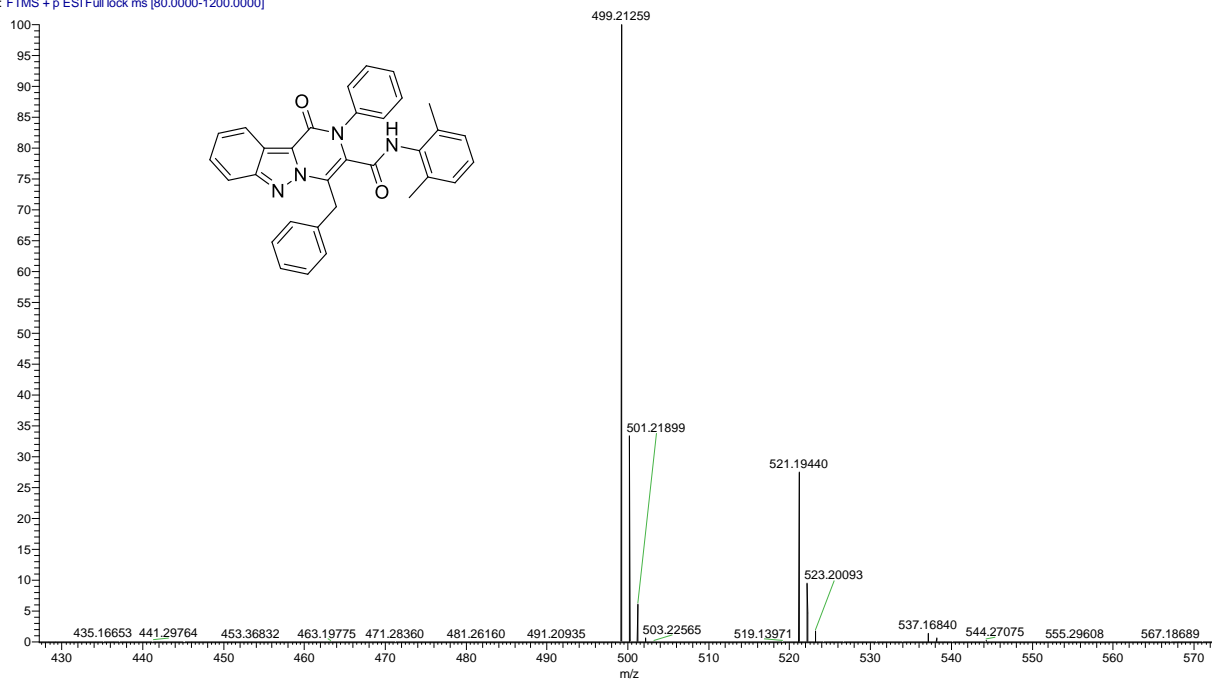

Compound **7f**

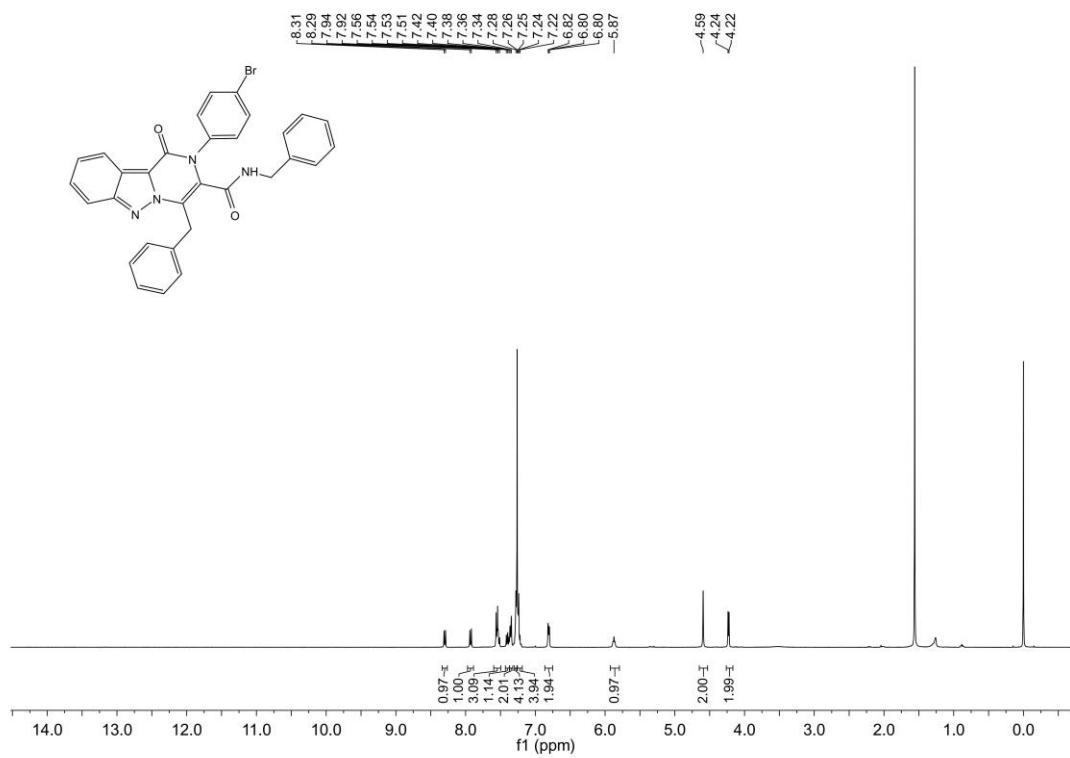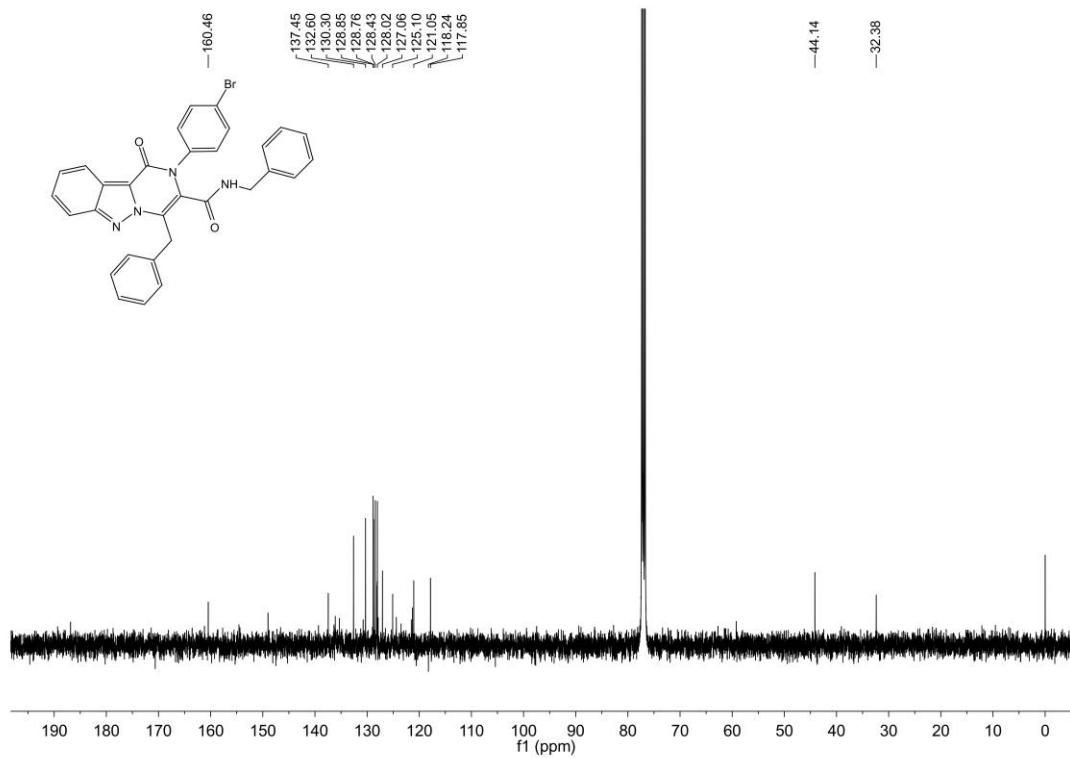

U5-71#917 RT: 6.50 AV: 1 NL: 1.55E7  
 T: FTMS + p ESI Full lock ms [80.0000-1200.0000]

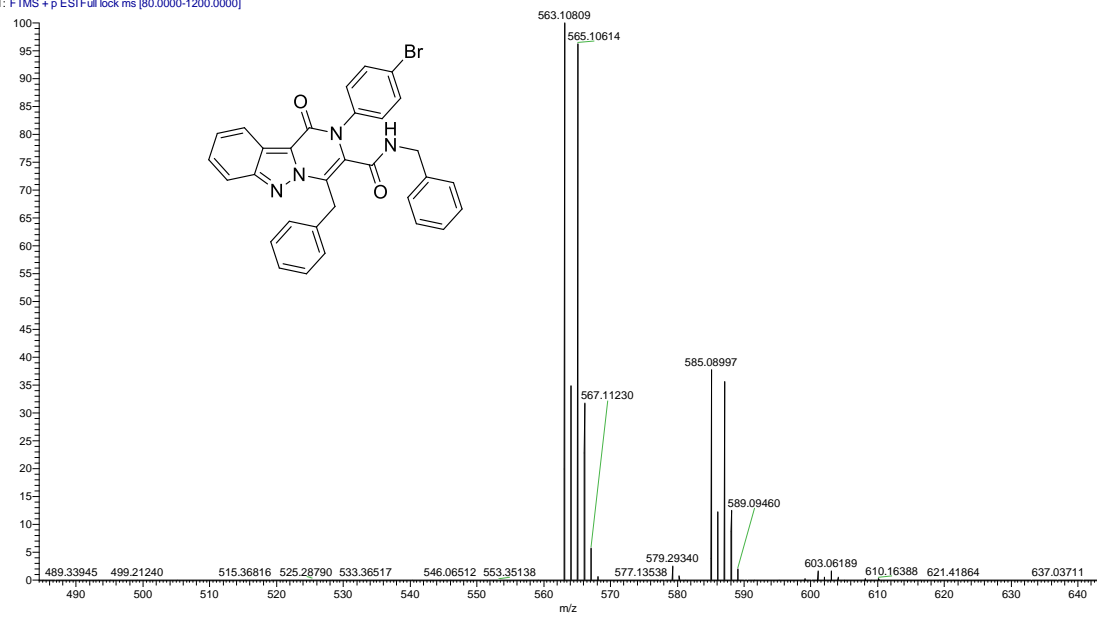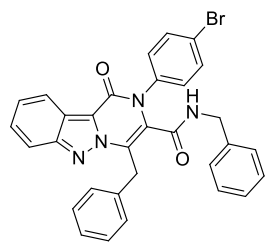

Compound 7g

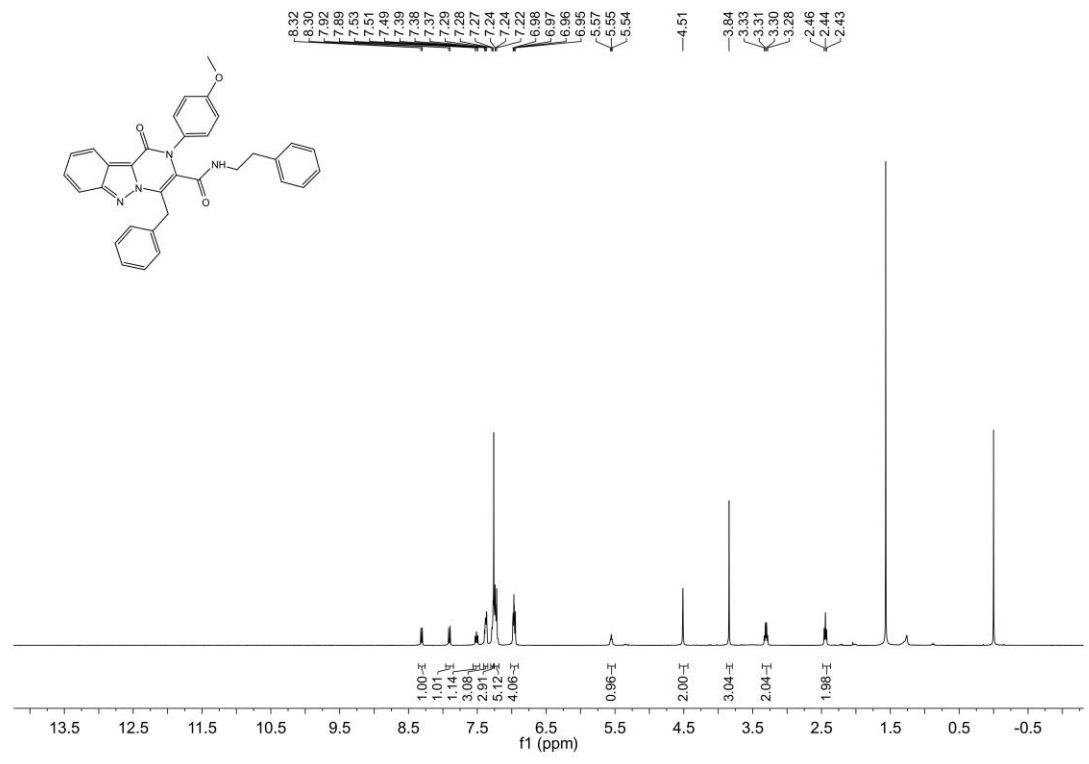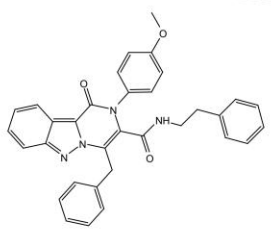

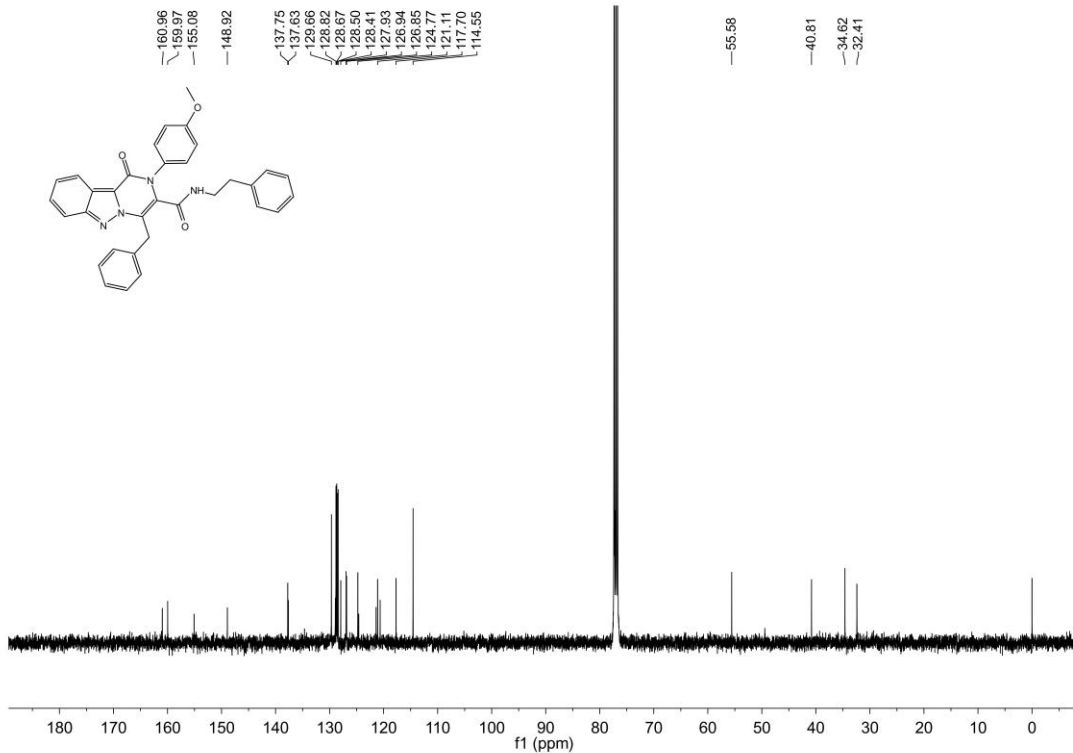

U5-7q #897 RT: 6.39 AV: 1 NL: 5.12E7  
T: FTMS + p ESI Full ms [80.0000-1200.0000]

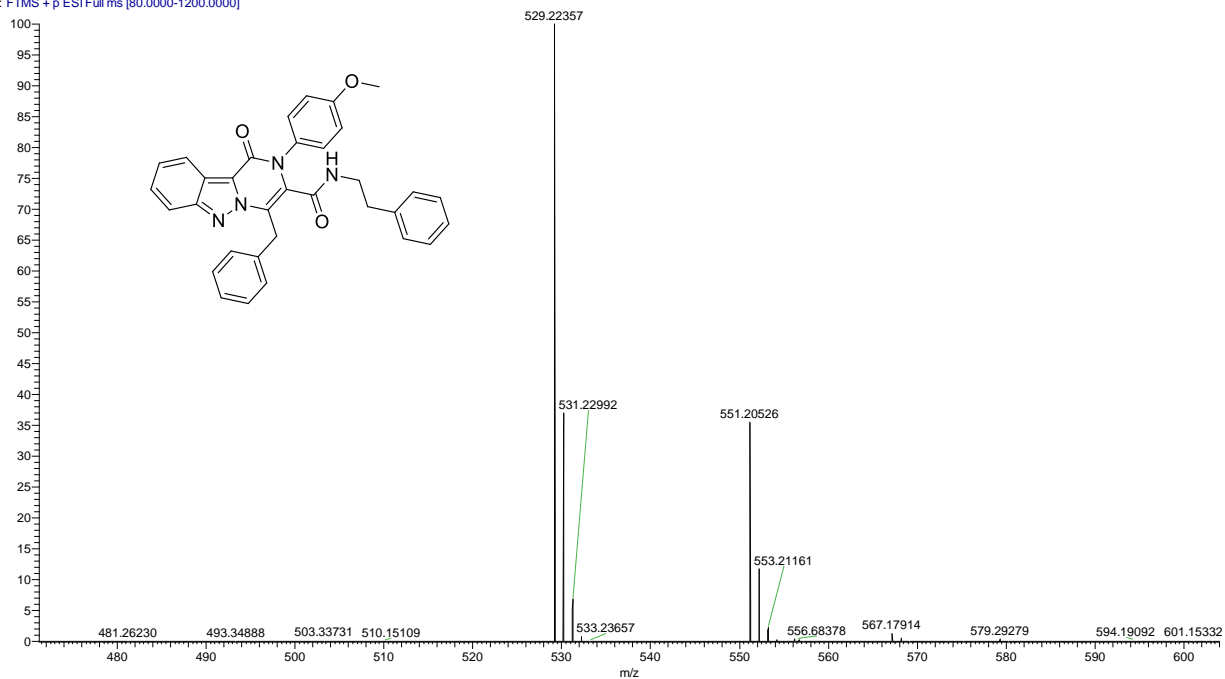

Compound 7h

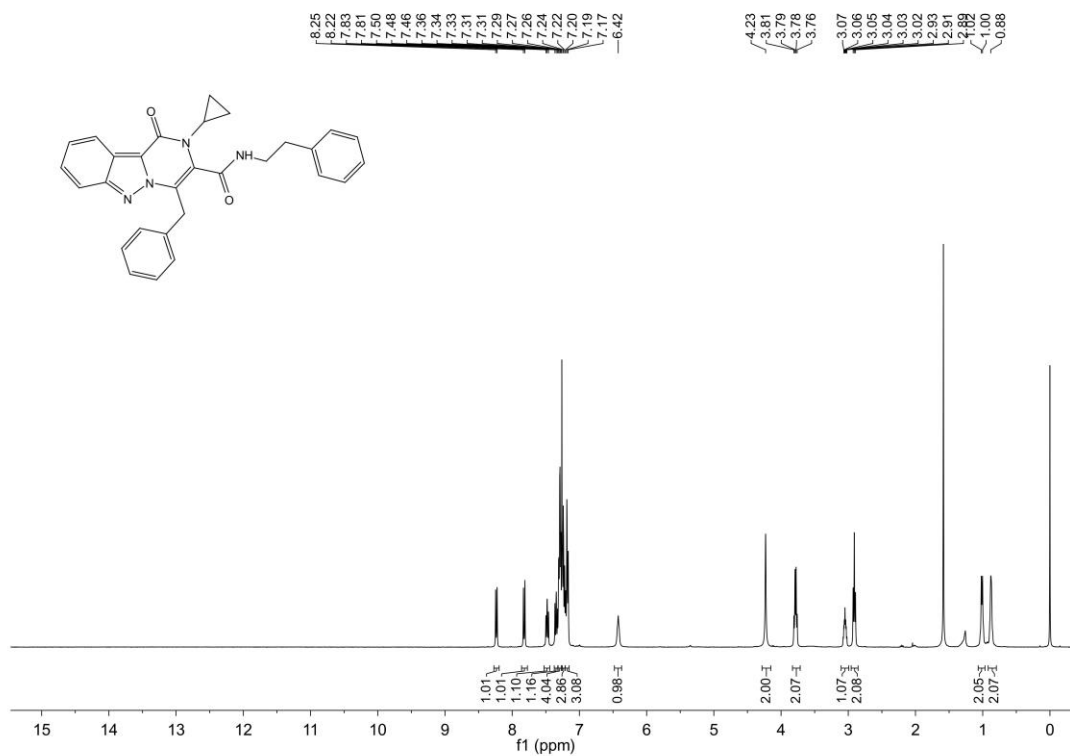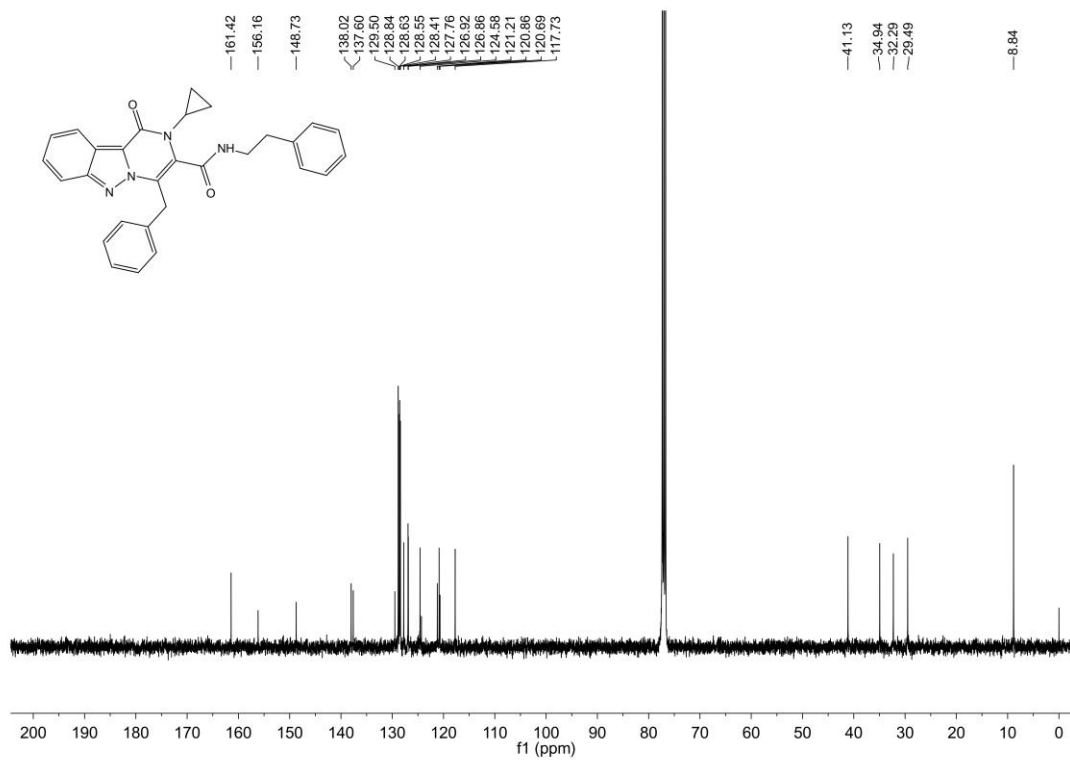



U5-7h #900 RT: 6.41 AV: 1 NL: 1.92E8  
T: FTMS + p ESI Full ms [80.0000-1200.0000]

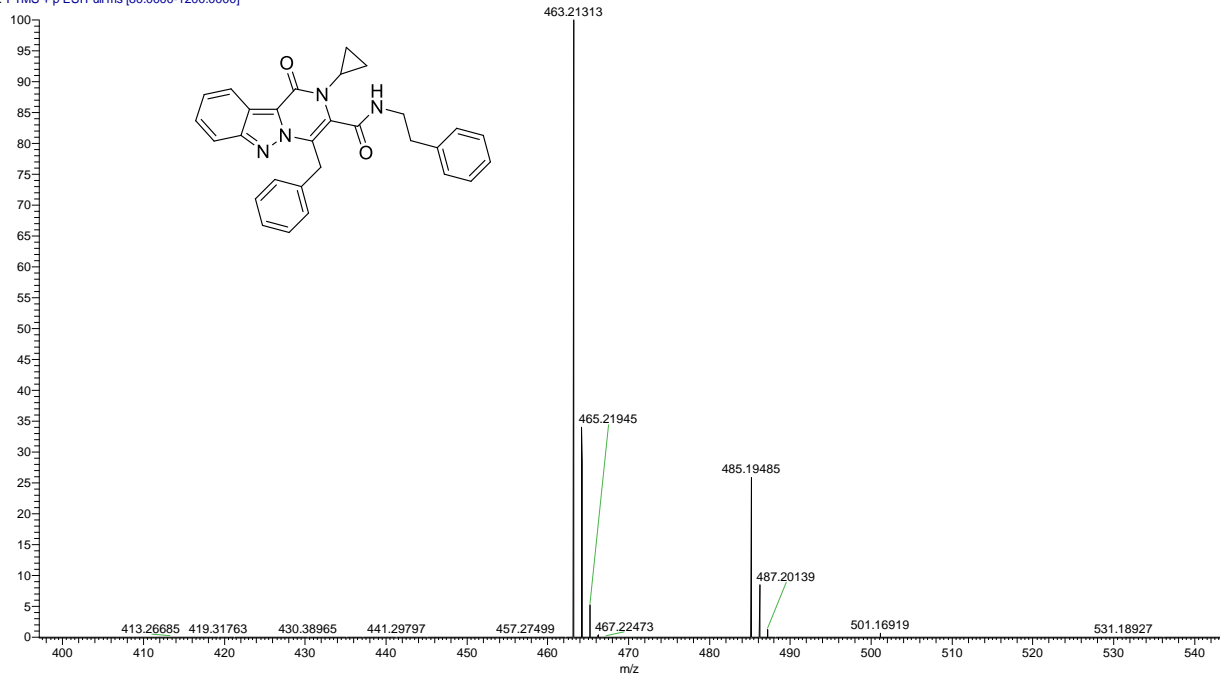

### Compound 7i

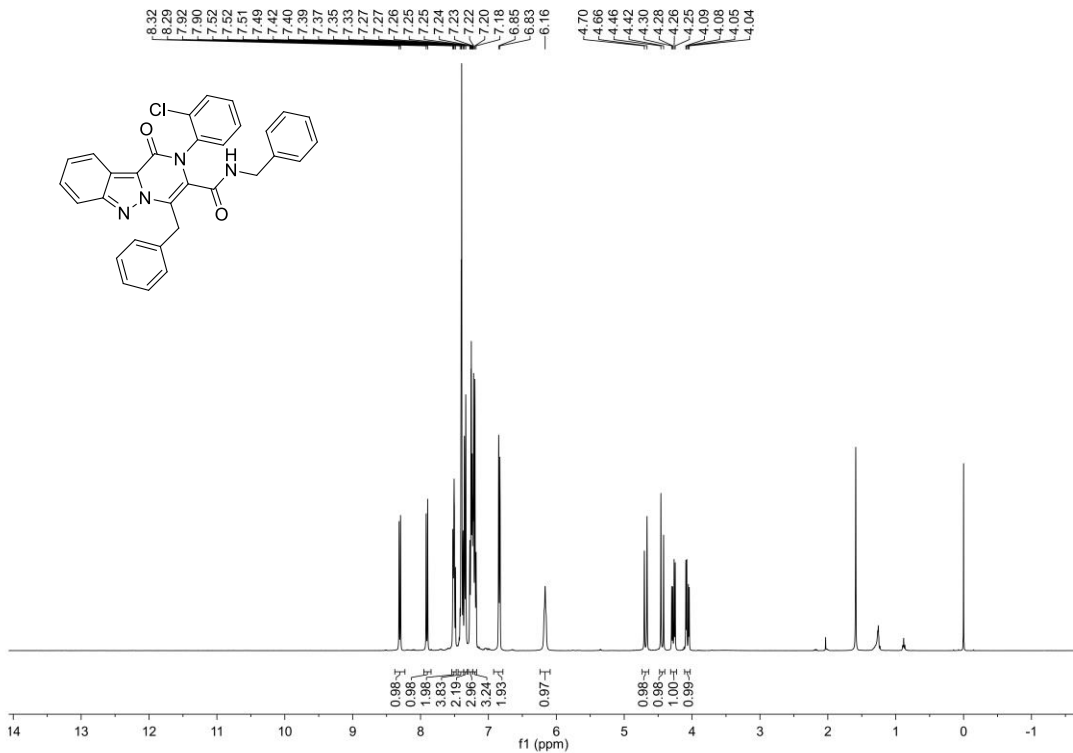

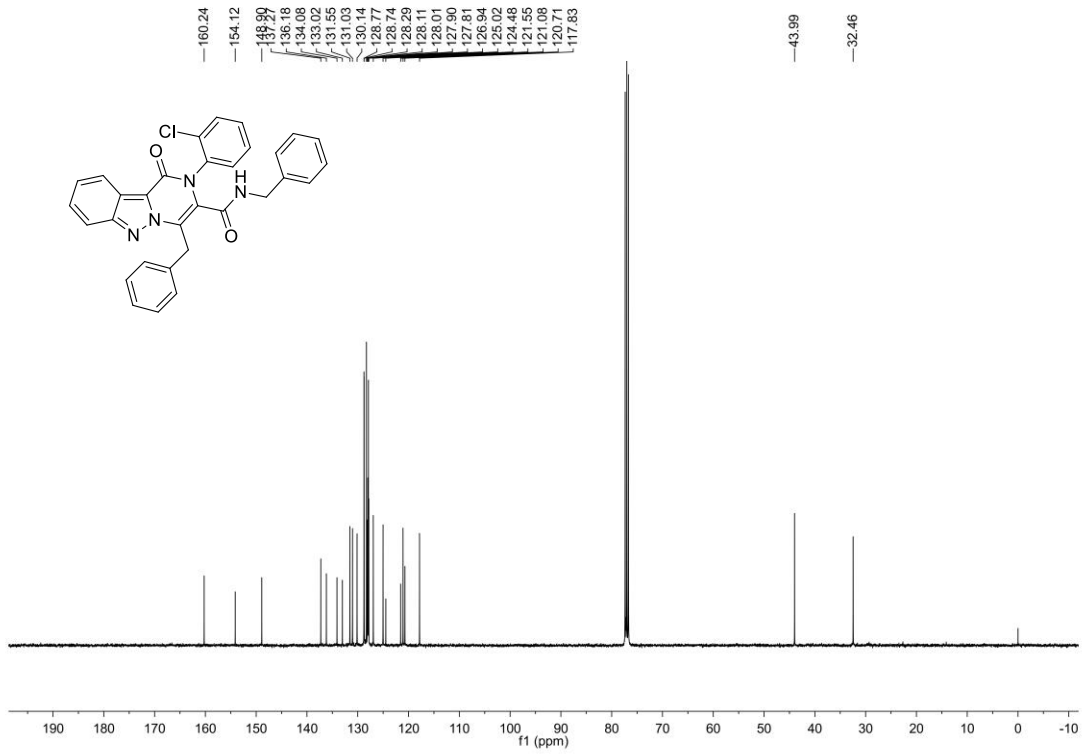

U5-7j #936 RT: 6.65 AV: 1 NL: 6.70E6  
T: FTMS + p ESI Full ms [80.0000-1200.0000]

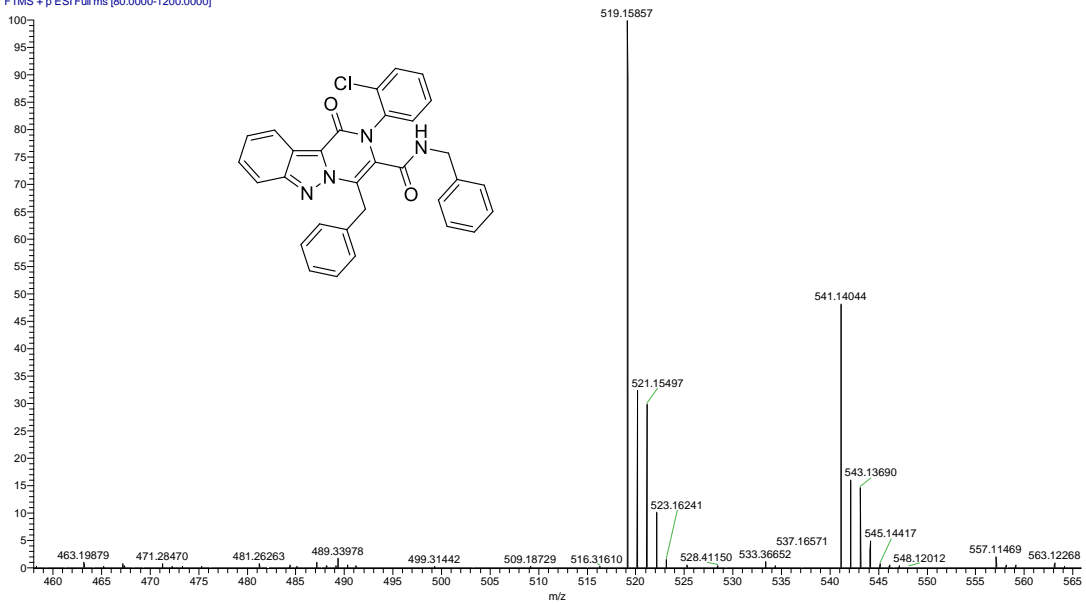

Compound 7j

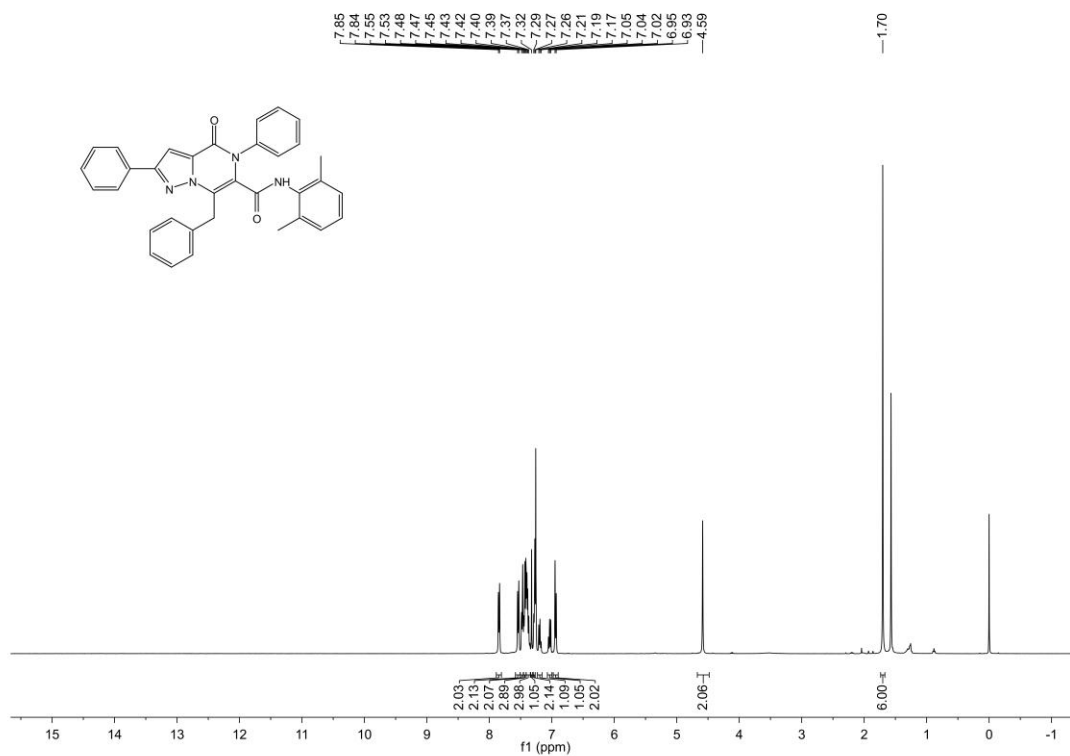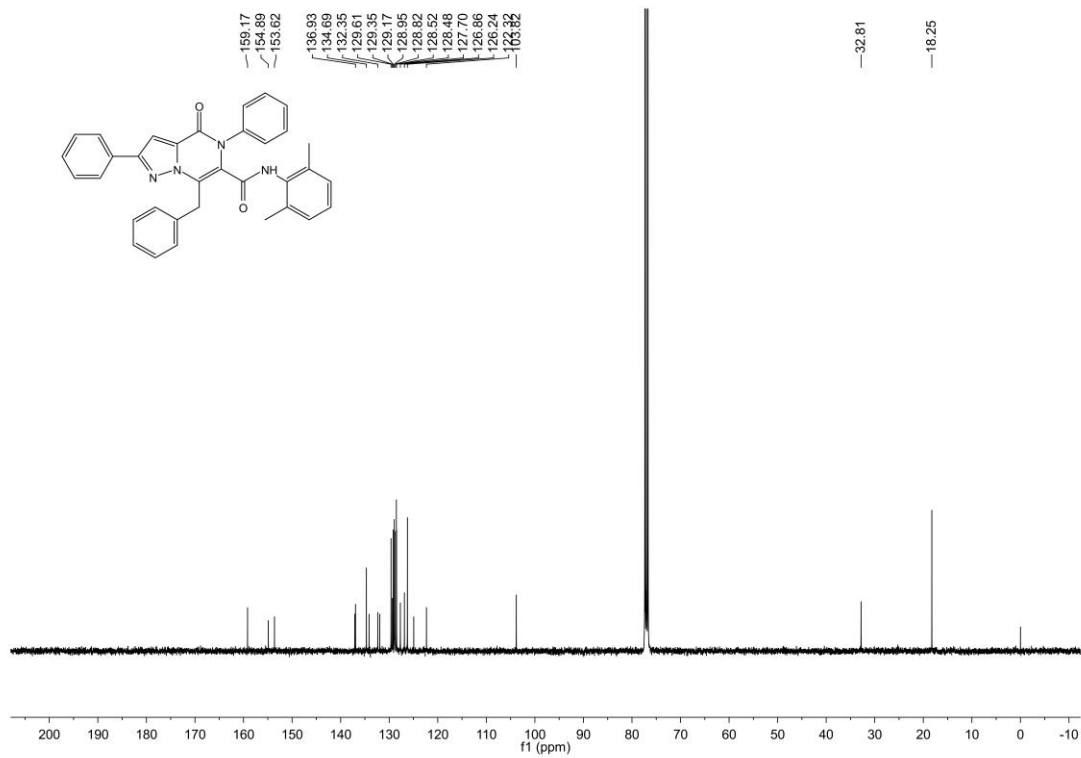

U7-1 #926 RT: 6.77 AV: 1 NL: 9.67E8  
 T: FTMS + p ESI Full ms [100.0000-1000.0000]

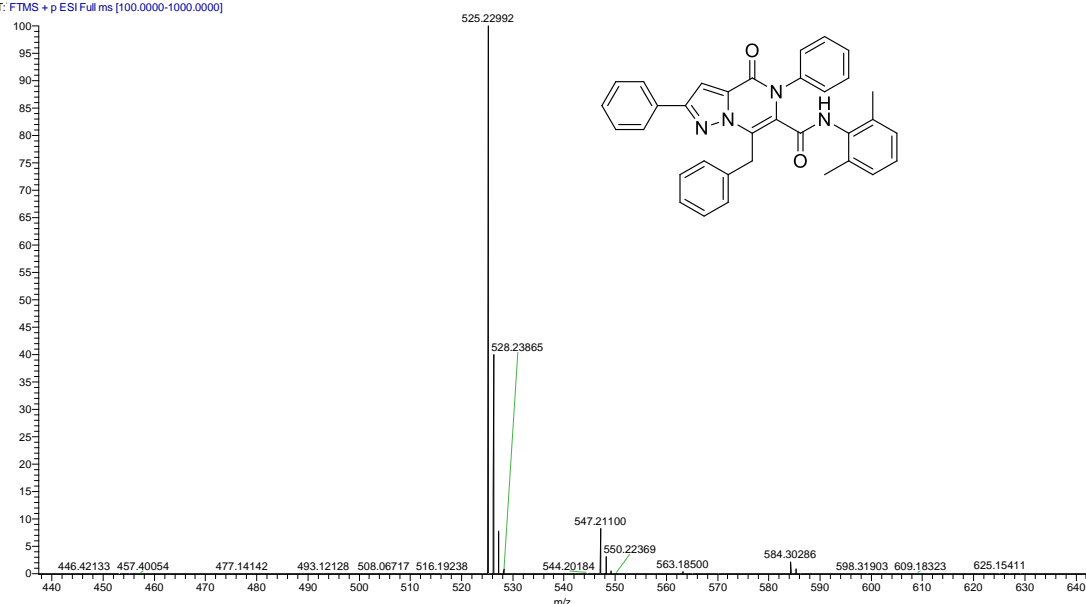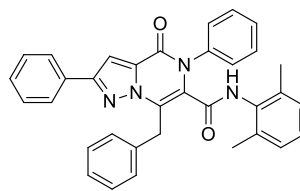

Compound 7k

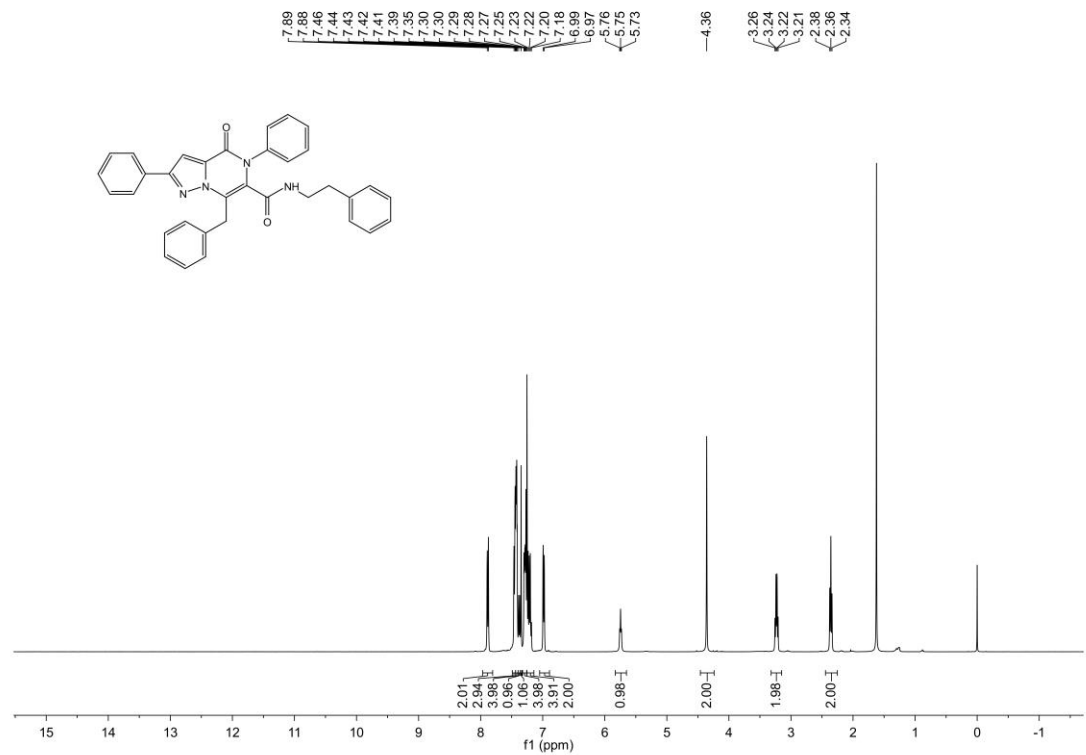

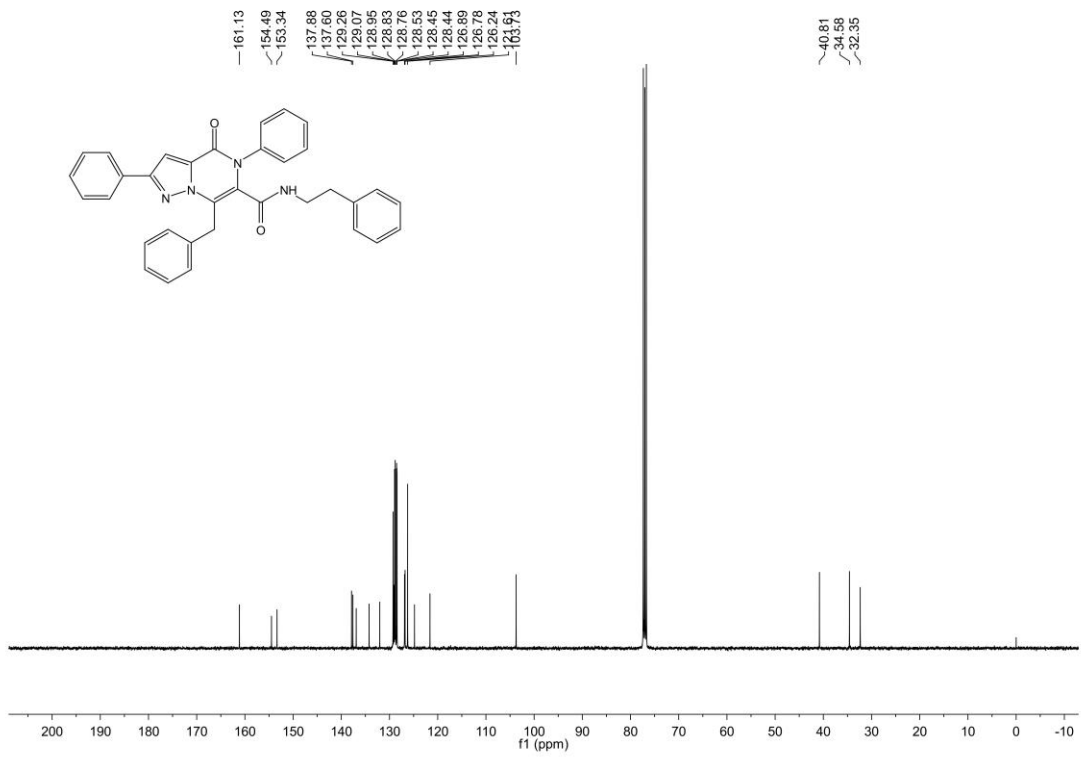

U7-2 #937 RT: 6.86 AV: 1 NL: 1.02E9  
T: FTMS + p ESI Full ms [100.0000-1000.0000]

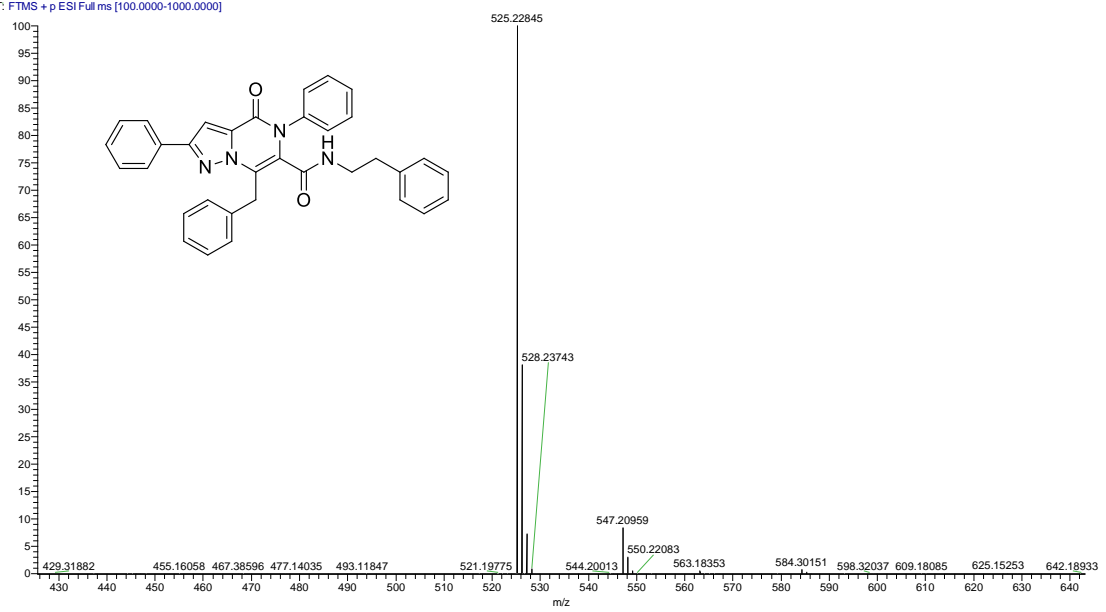

Compound 71

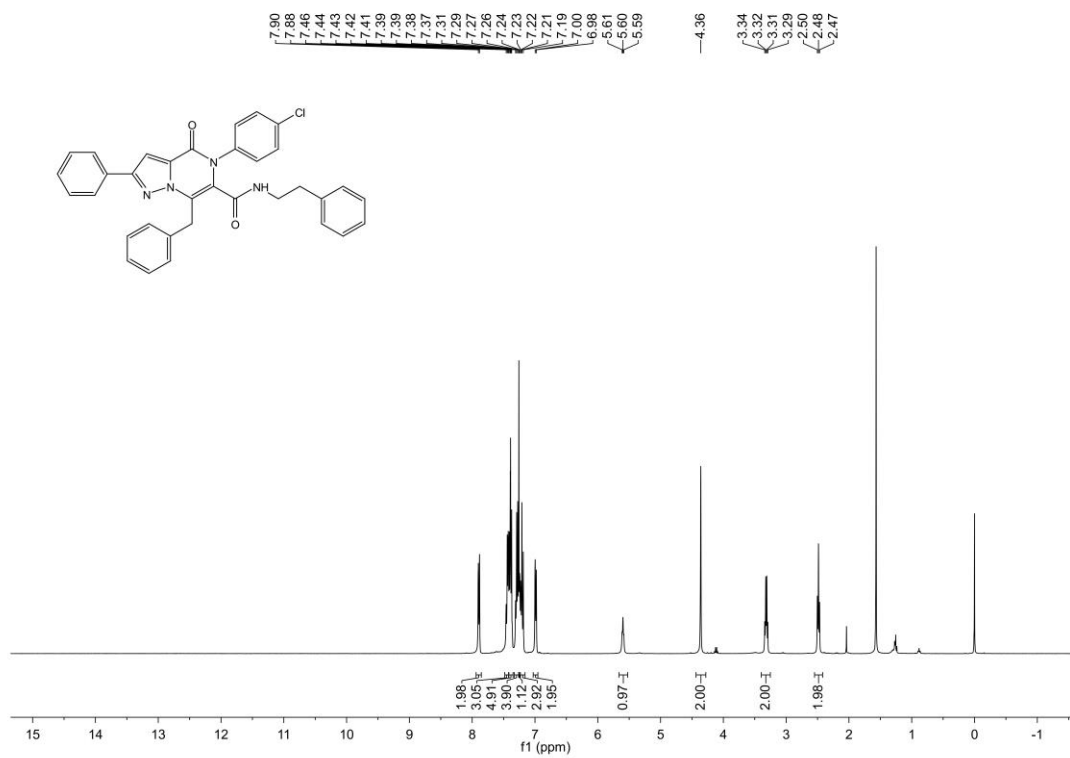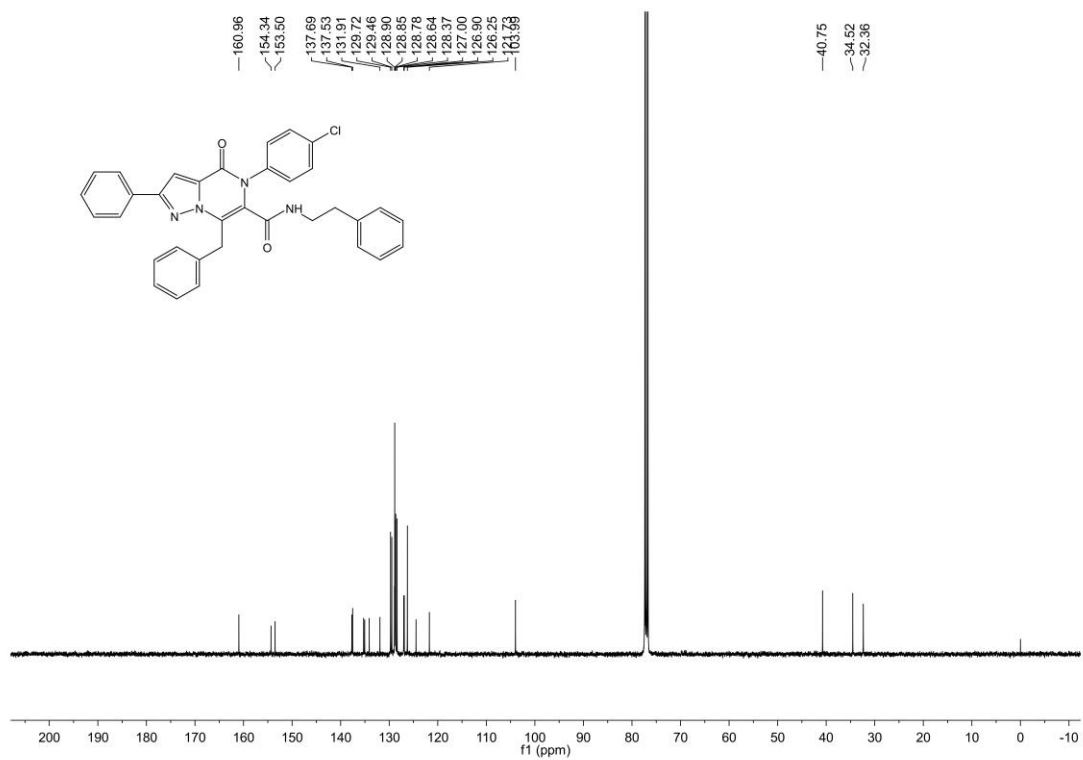

U7-3 #947 RT: 6.92 AV: 1 NL: 6.44E8  
T: FTMS + p ESI Full ms [100.0000-1000.0000]

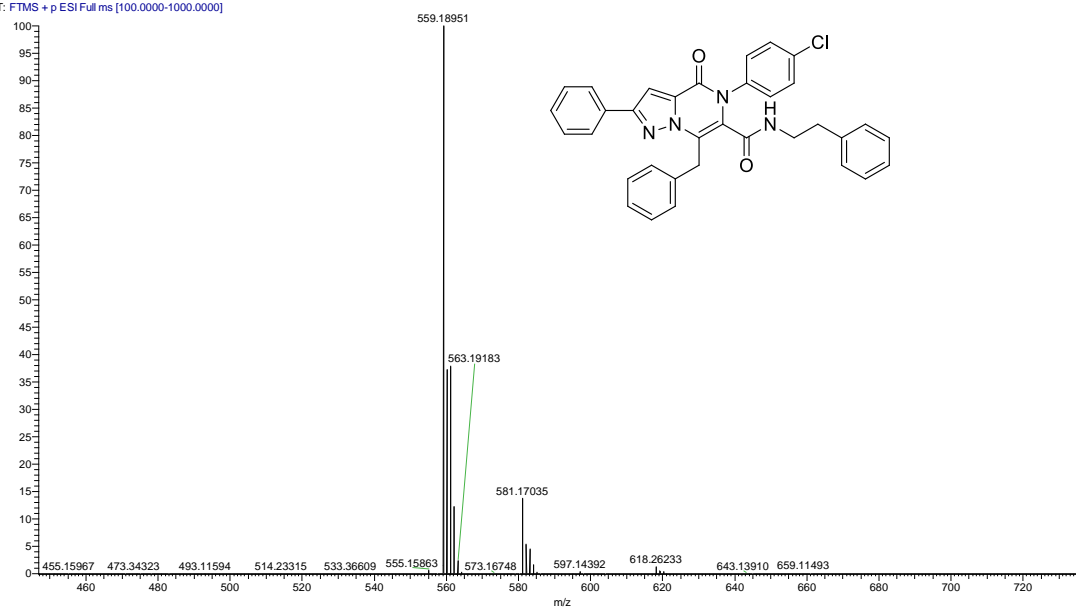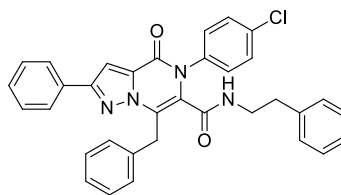

### Compound 7m

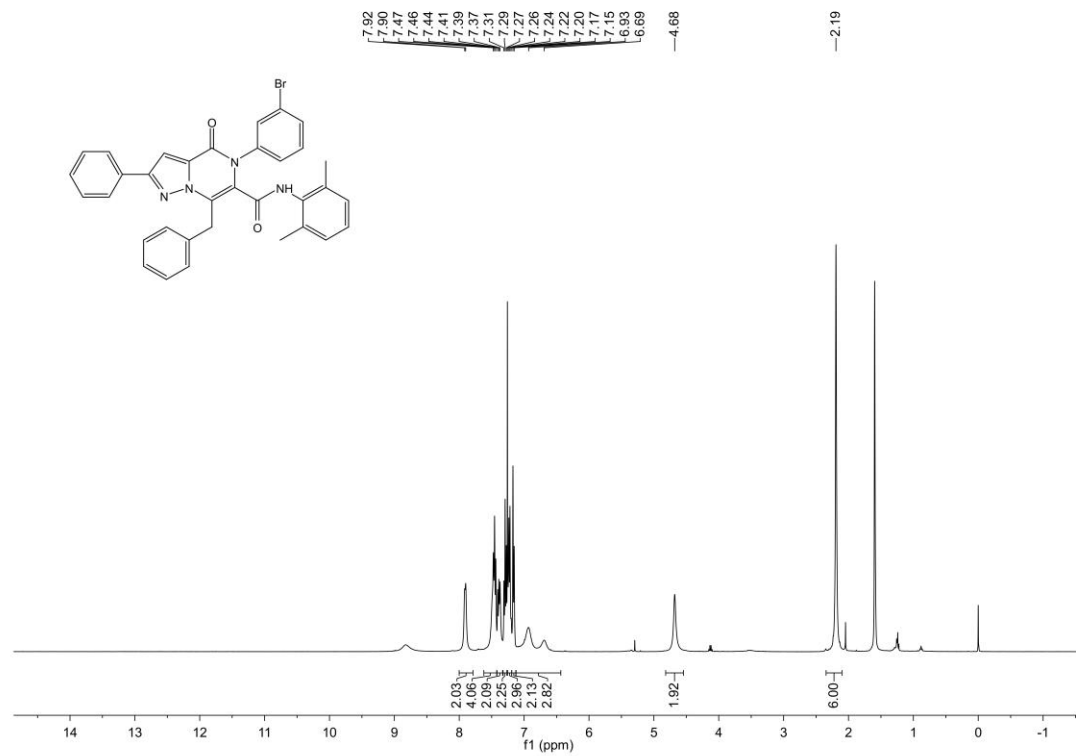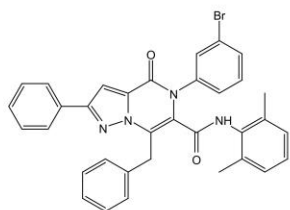

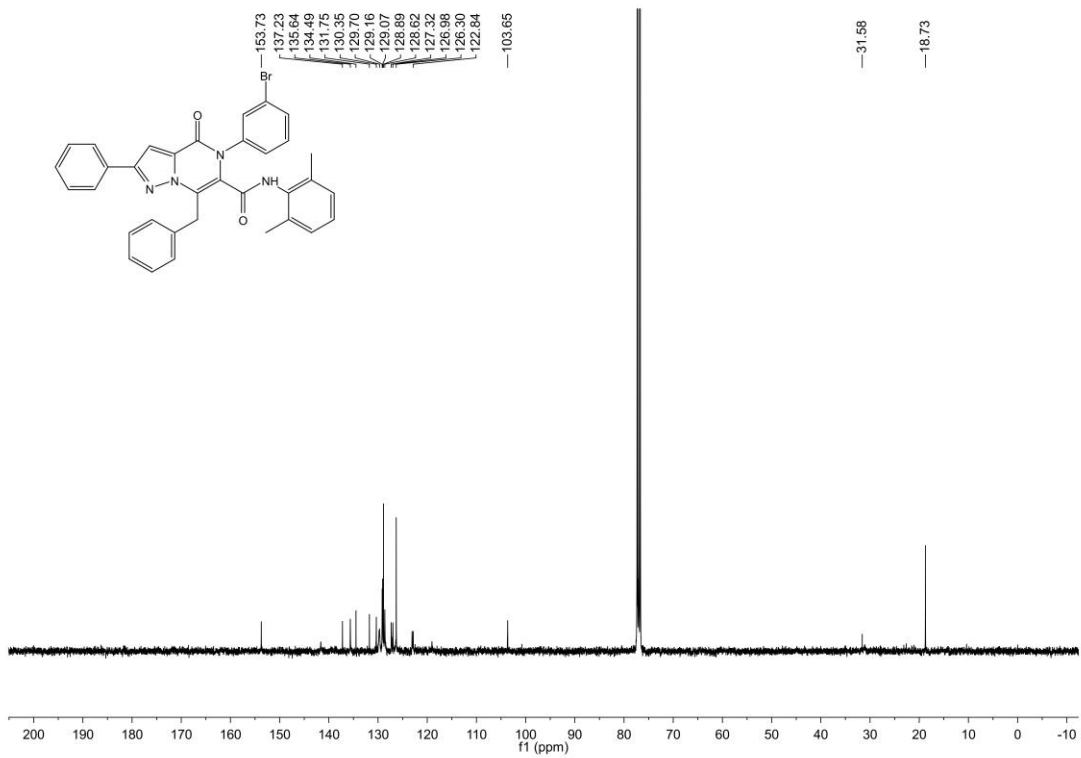

U7-4 #993 RT: 7.20 AV: 1 NL: 6.05E8  
T: FTMS + p ESI Full ms [100.0000-1000.0000]

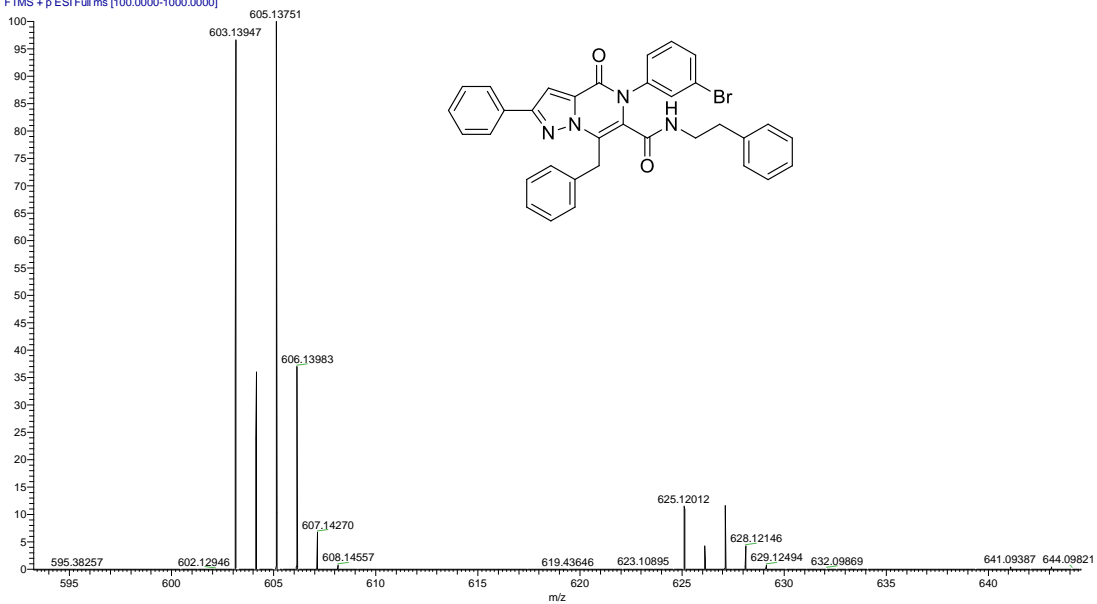



Compound **7n**

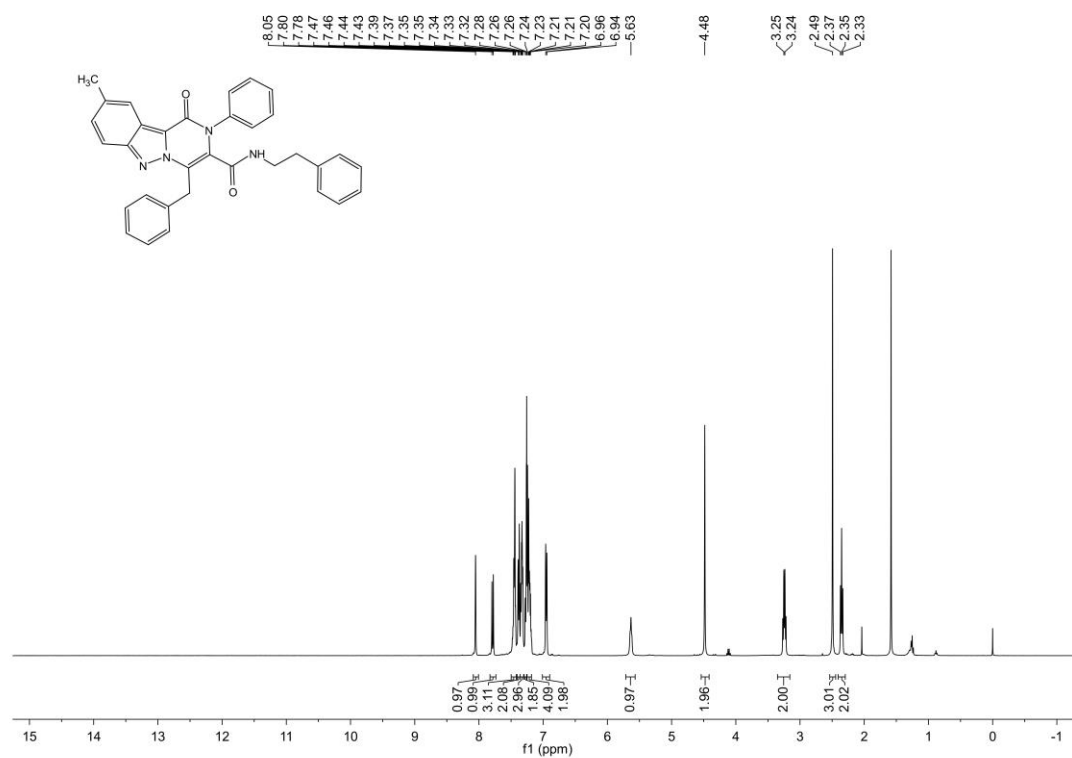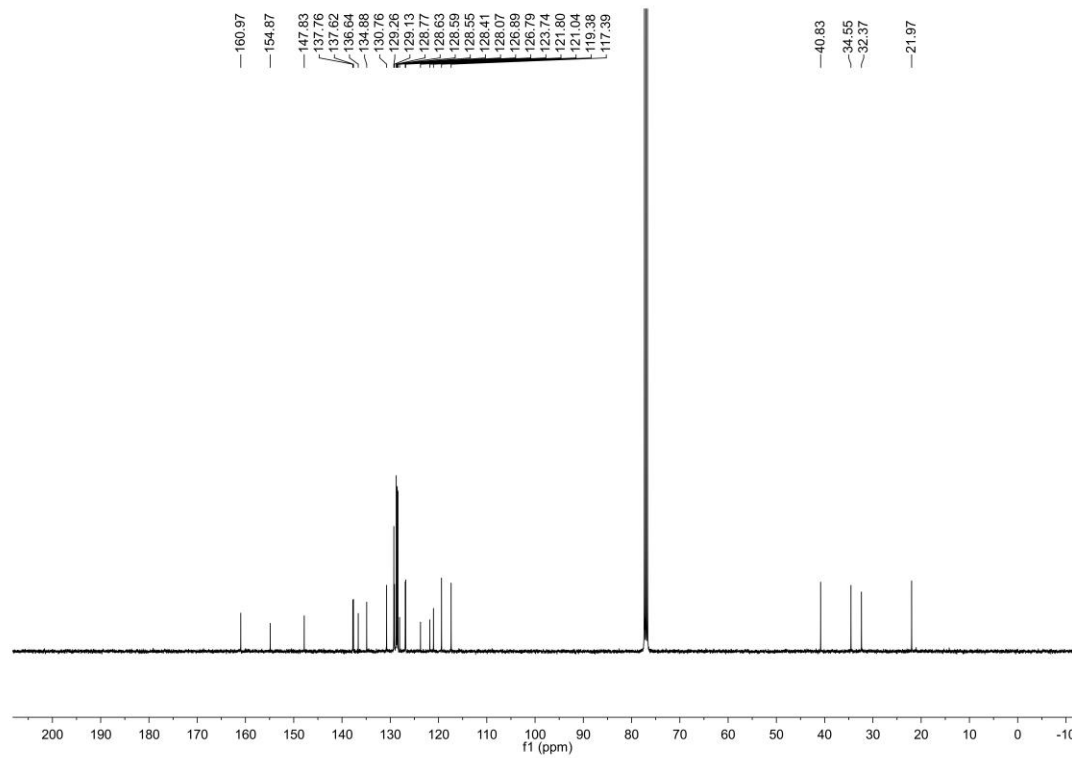

U7-5 #929 RT: 6.77 AV: 1 NL: 2.69E9  
T: FTMS + p ESI Full ms [100.0000-1000.0000]

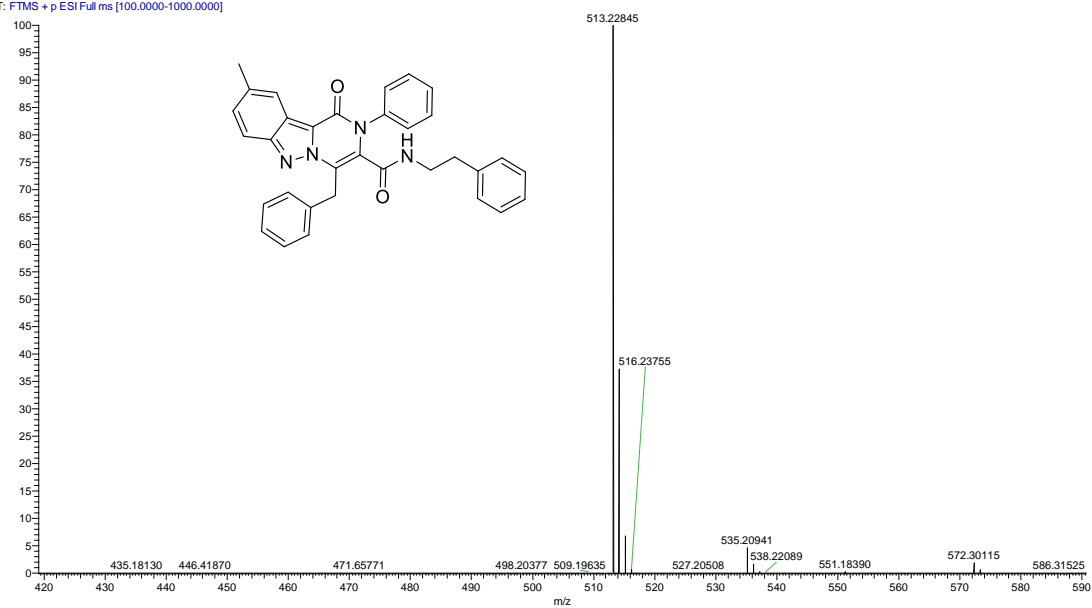

### Compound 7o

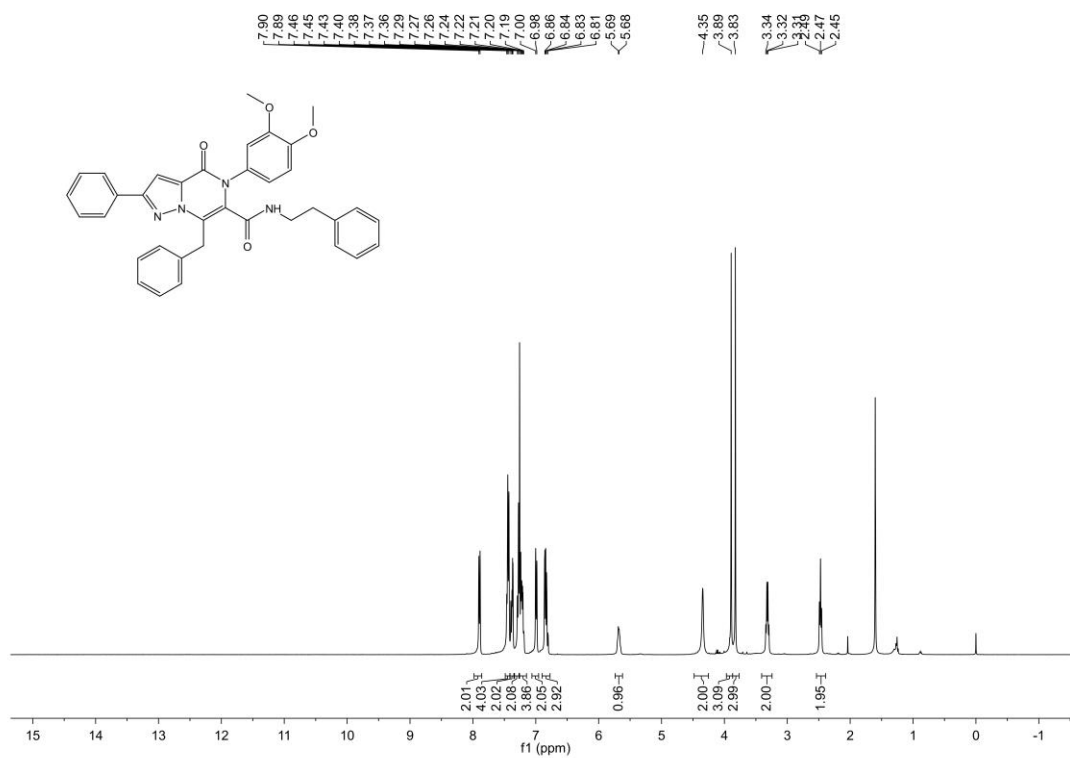

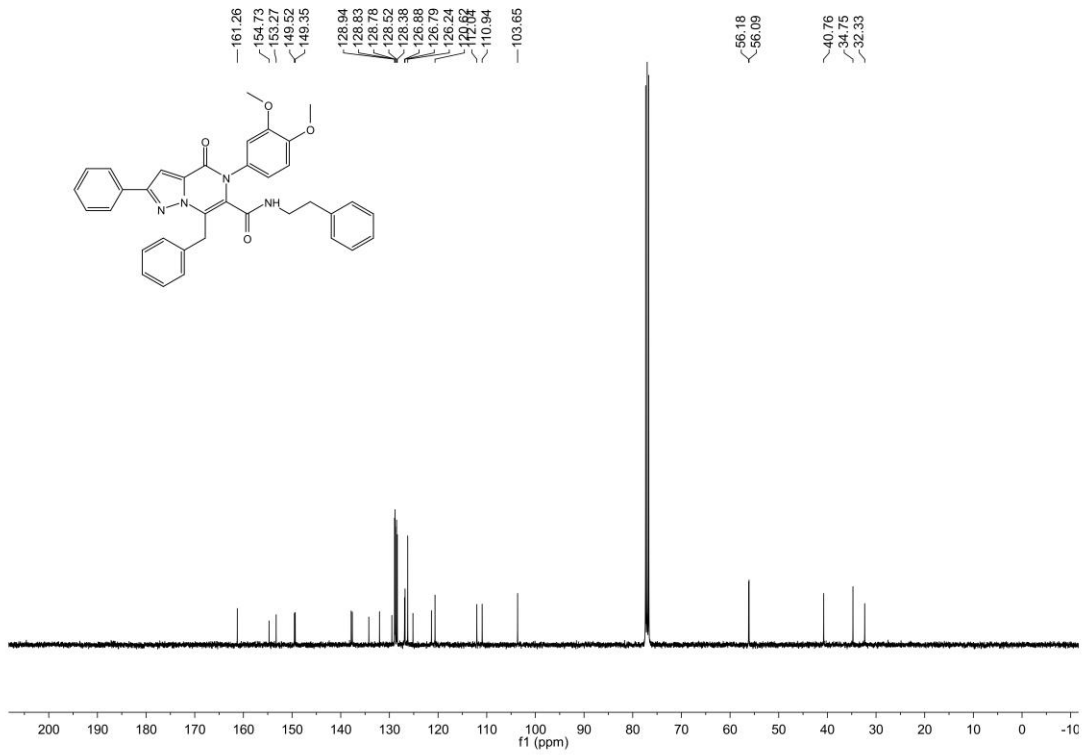

U7-6 #936 RT: 6.83 AV: 1 NL: 2.74E8  
T: FTMS + p ESI Full ms [100.0000-1000.0000]

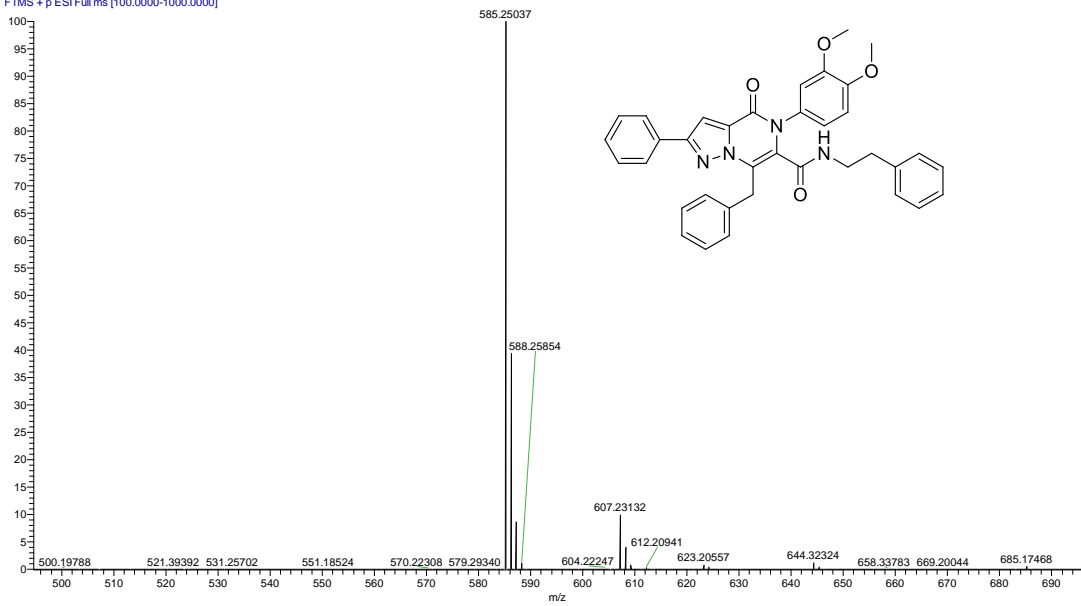

Compound **7p**

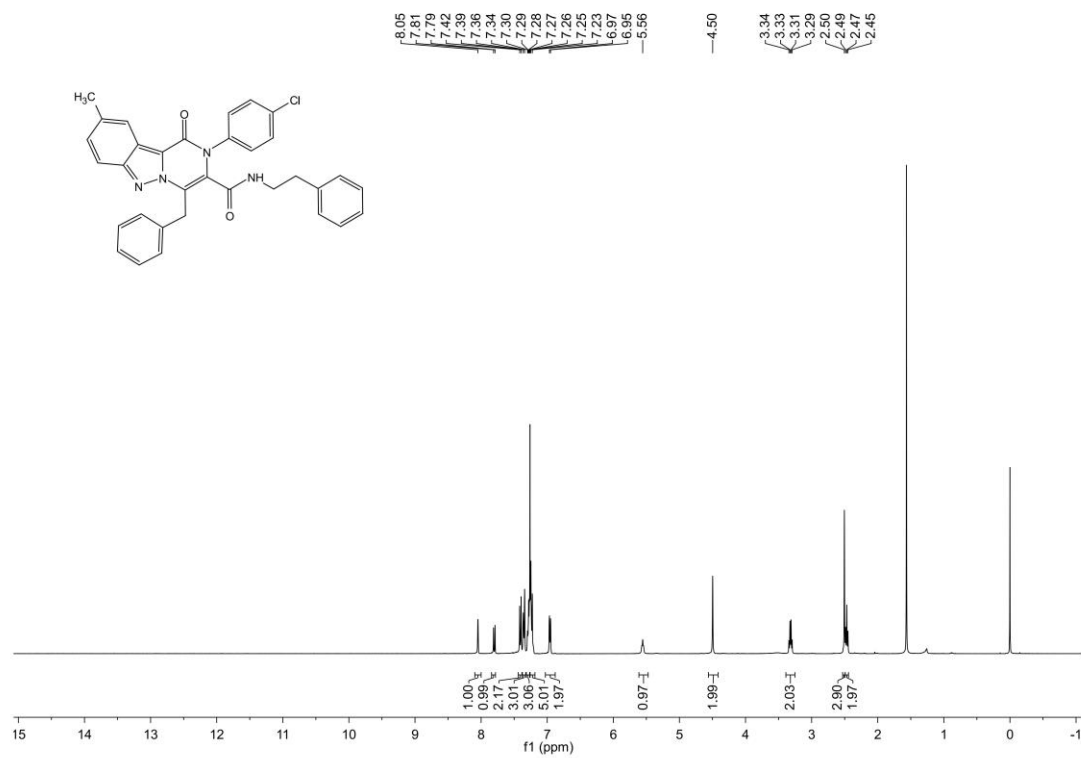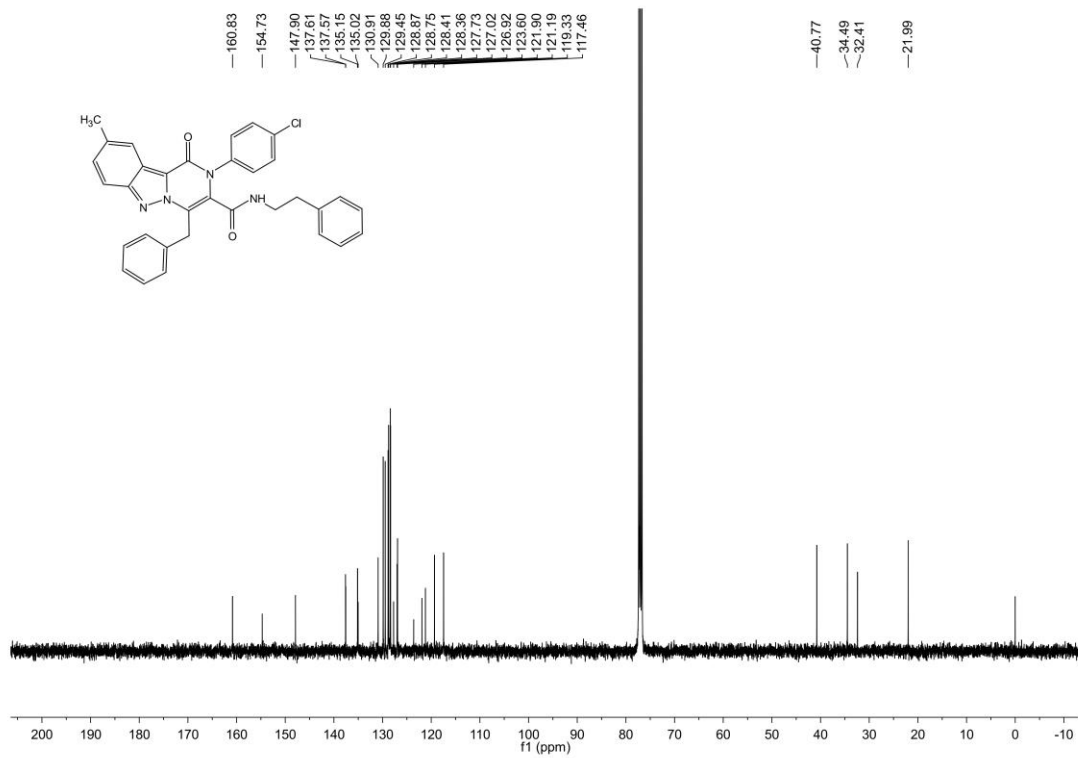

U7-7 #1039 RT: 7.46 AV: 1 NL: 7.76E6  
 T: FTMS + p ESI Full lock ms [100.0000-1000.0000]

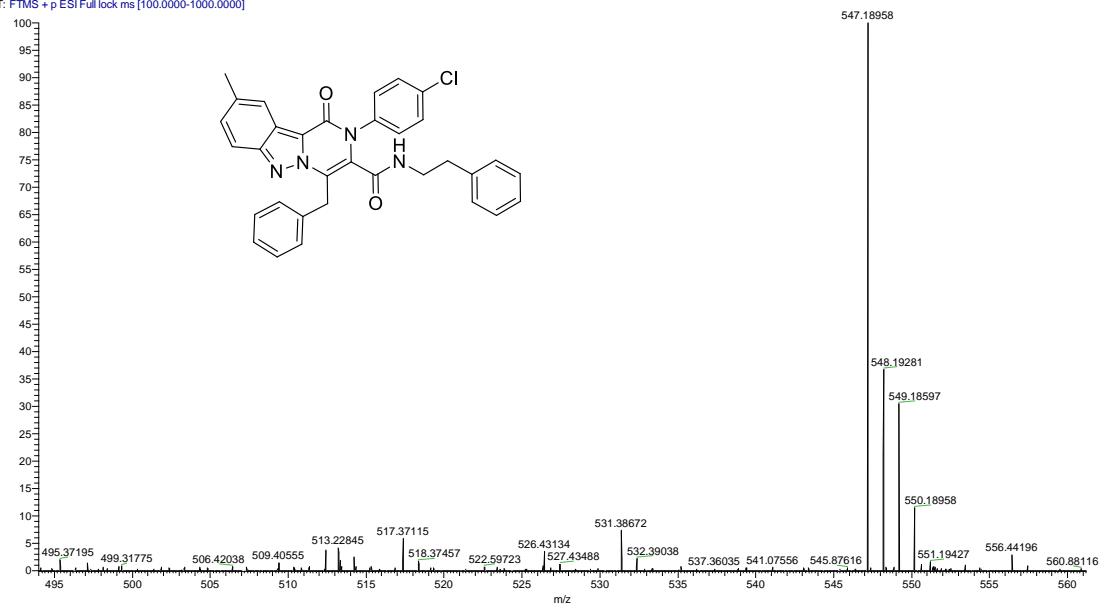

### Compound 7q

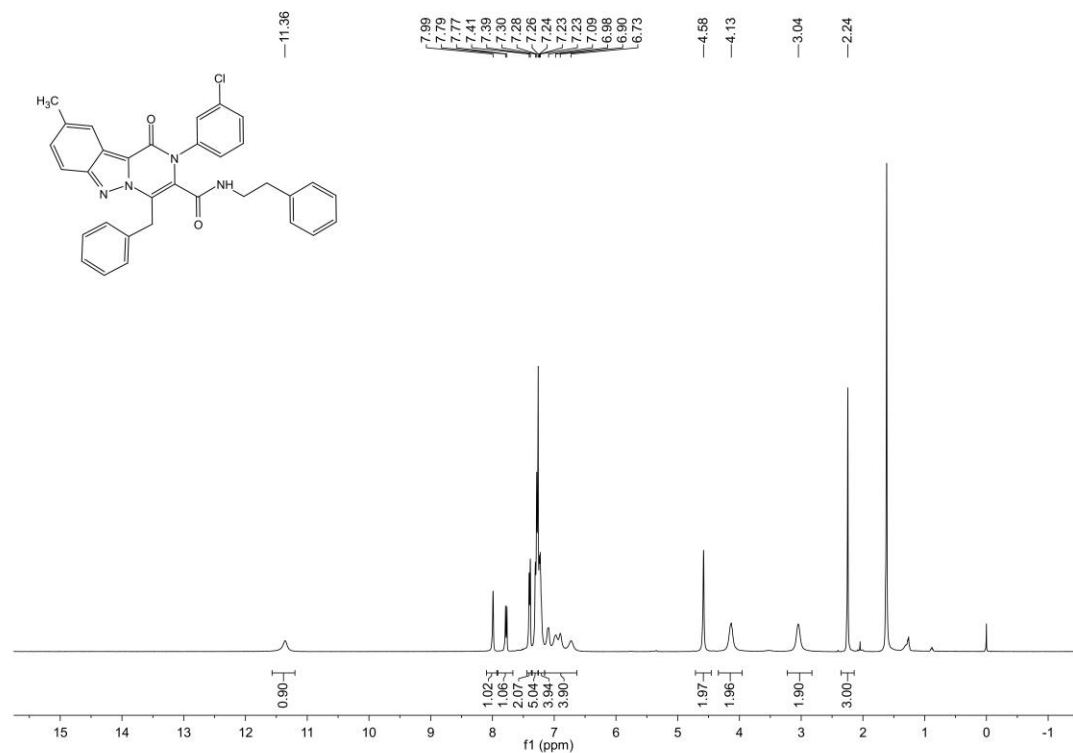

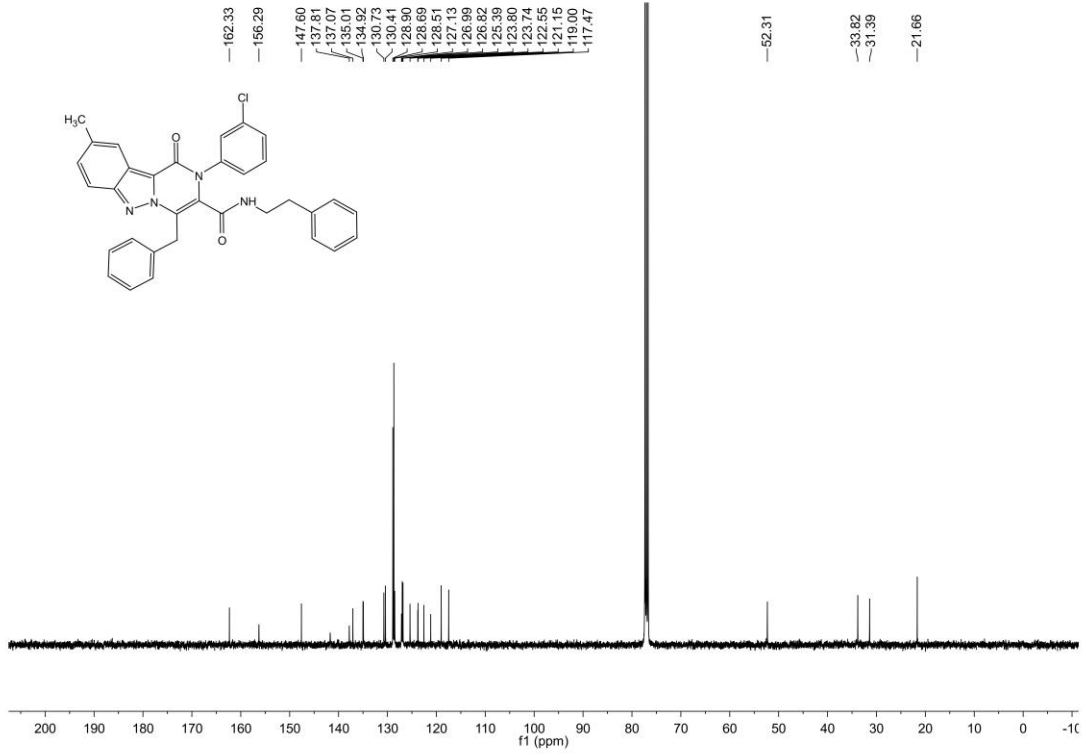

U7-8 #991 RT: 7.18 AV: 1 NL: 8.48E8  
T: FTMS + p ESI Full ms [100.0000-1000.0000]

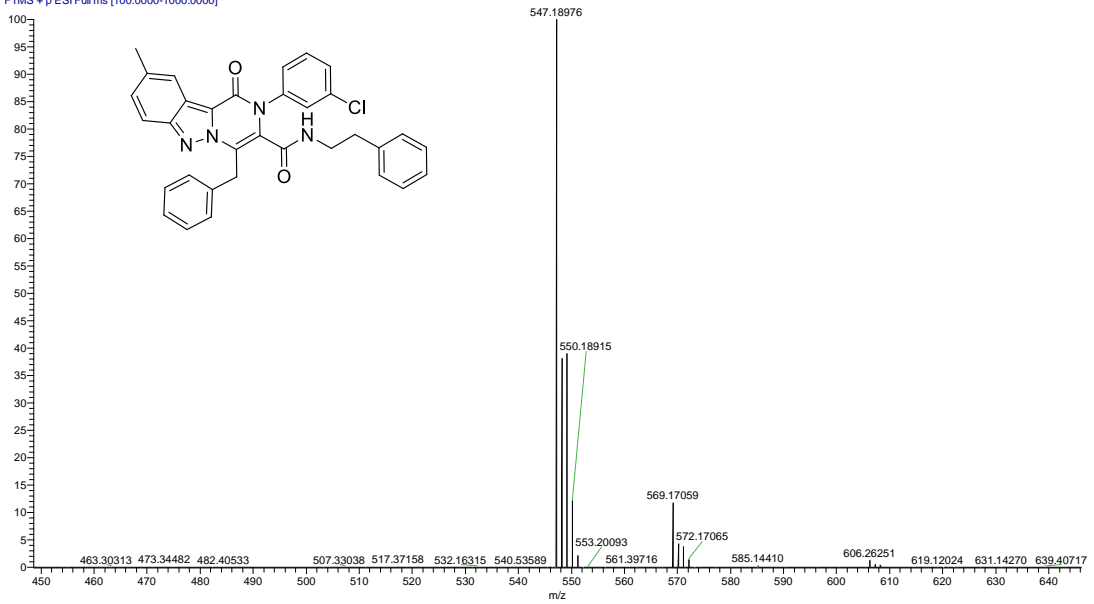

Compound 7r

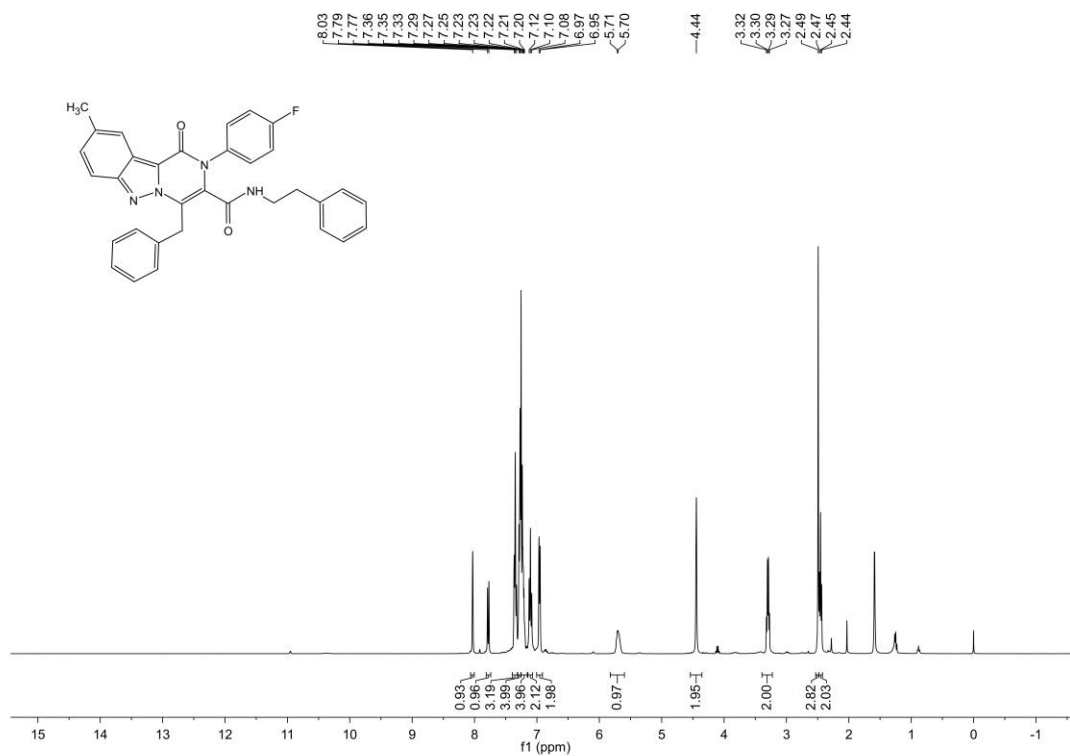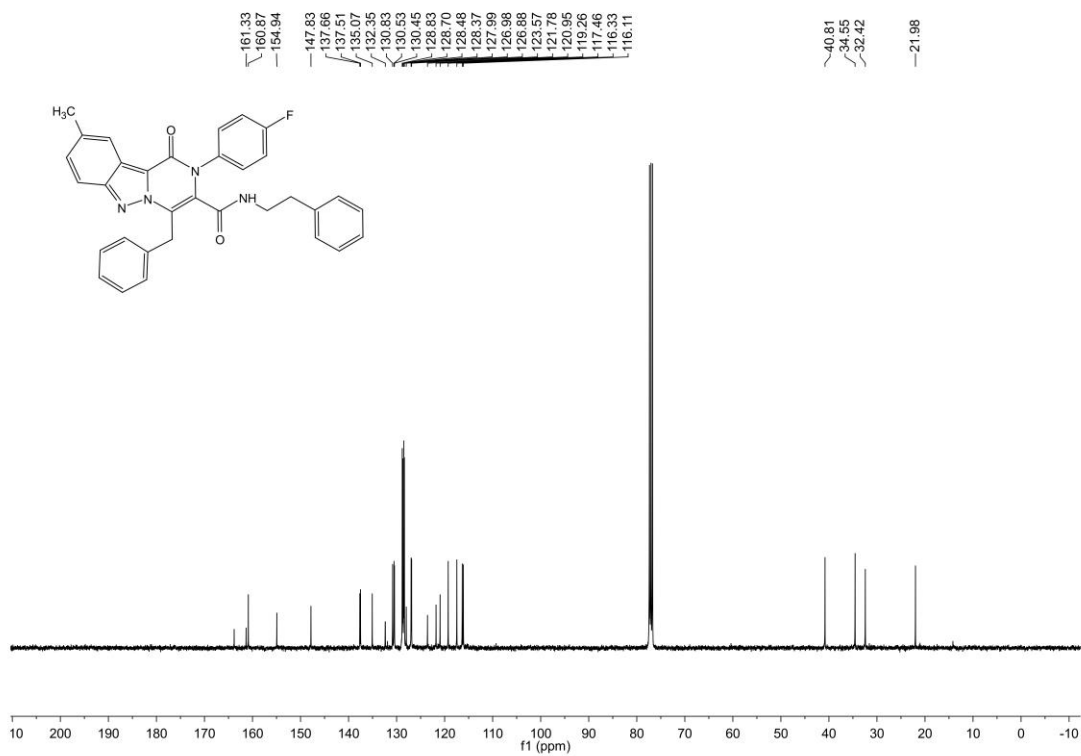

U7-9#941 RT: 6.86 AV: 1 NL: 2.12E8  
T: FTMS + p ESI Full ms [100.0000-1000.0000]

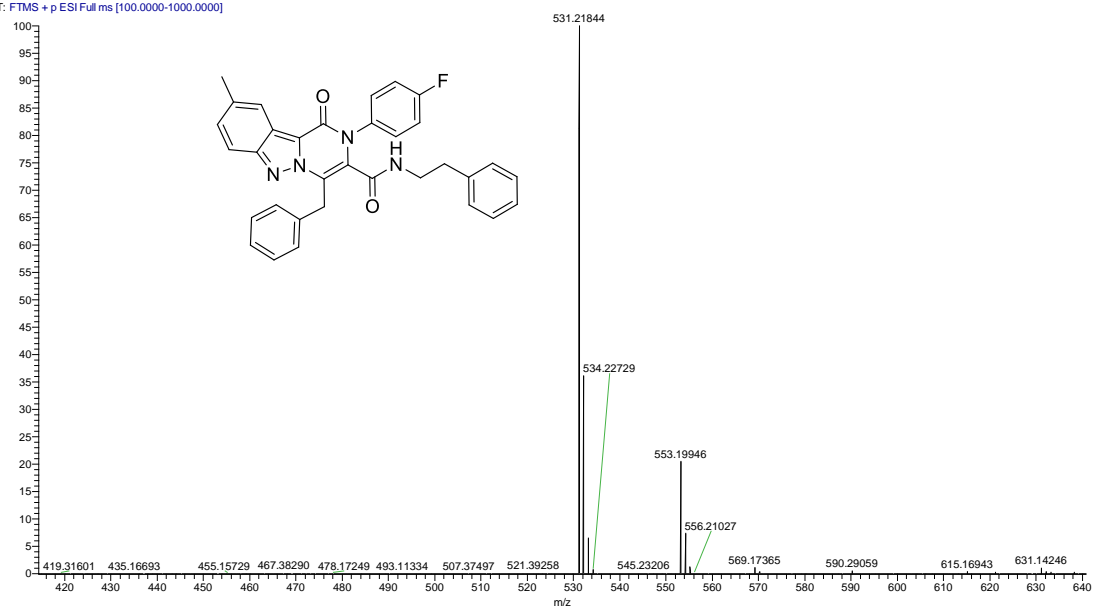

### Compound 7s

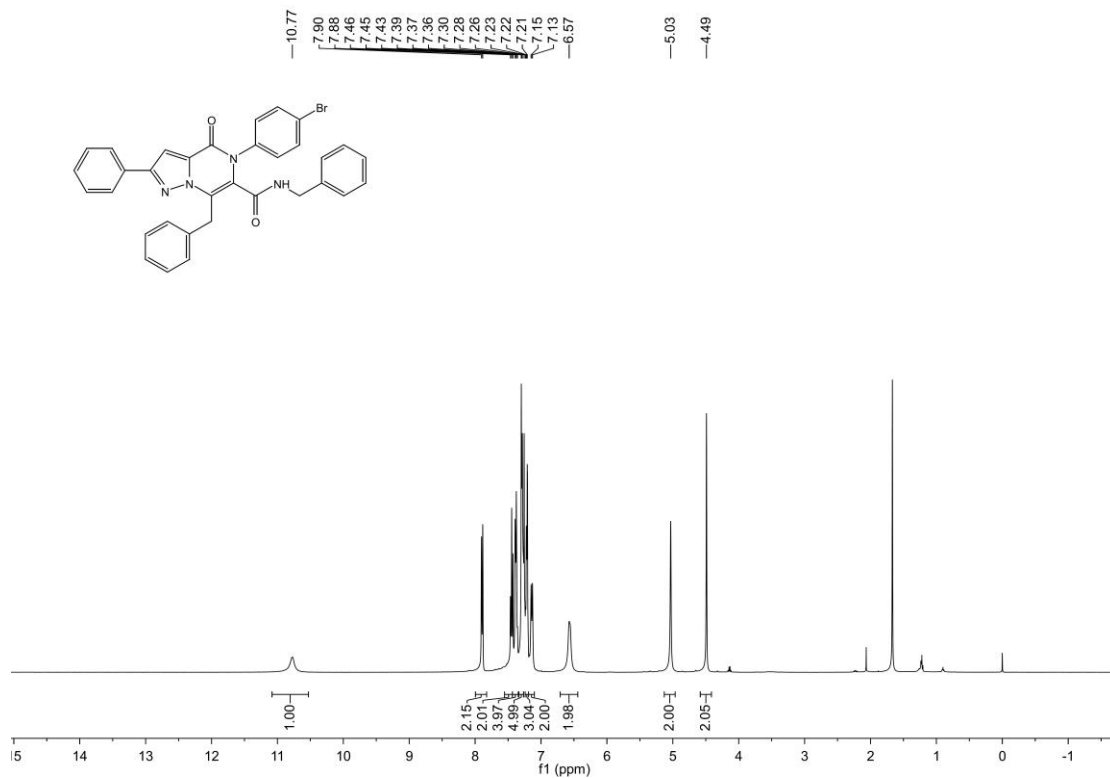



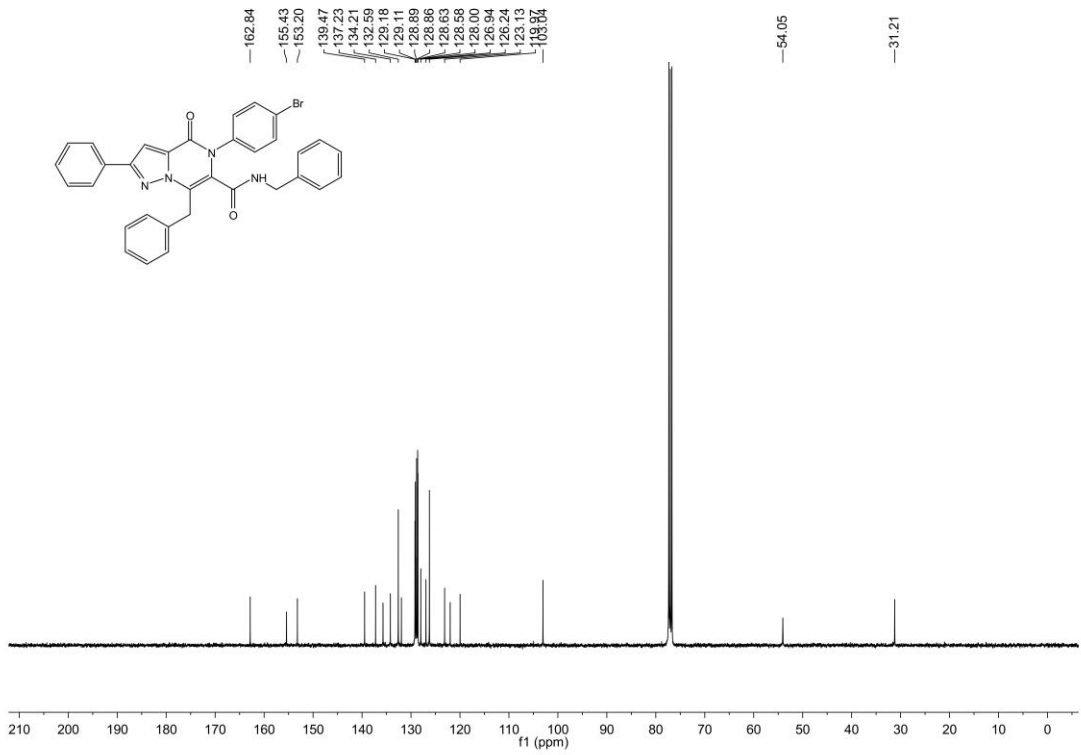

U7-10 #1001 RT: 7.24 AV: 1 NL: 1.09E9  
T: FTMS + p ESI Full ms [100.0000-1000.0000]

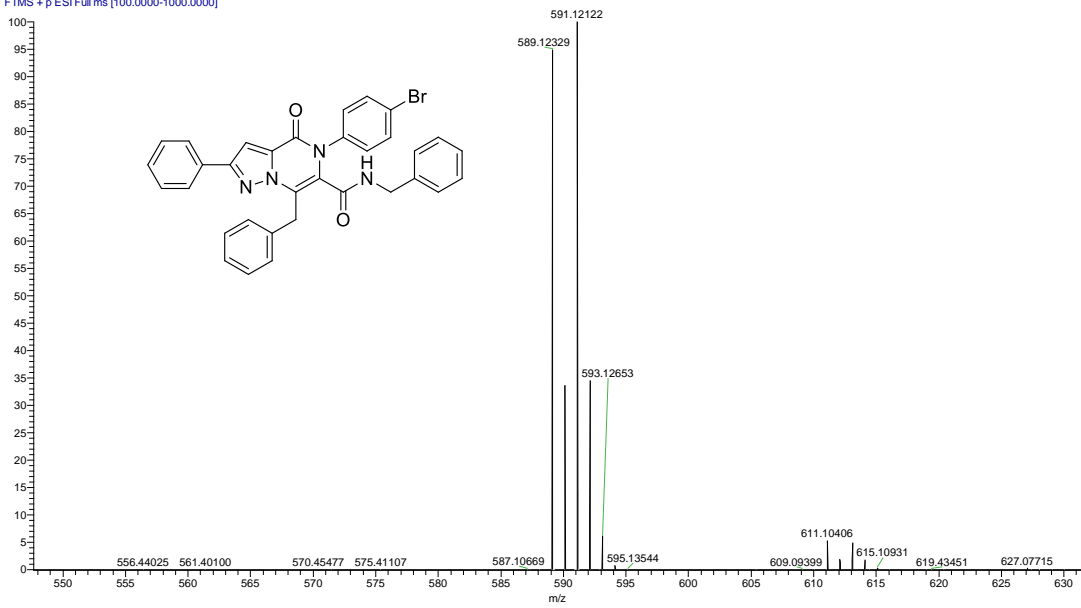

# Compound 11a

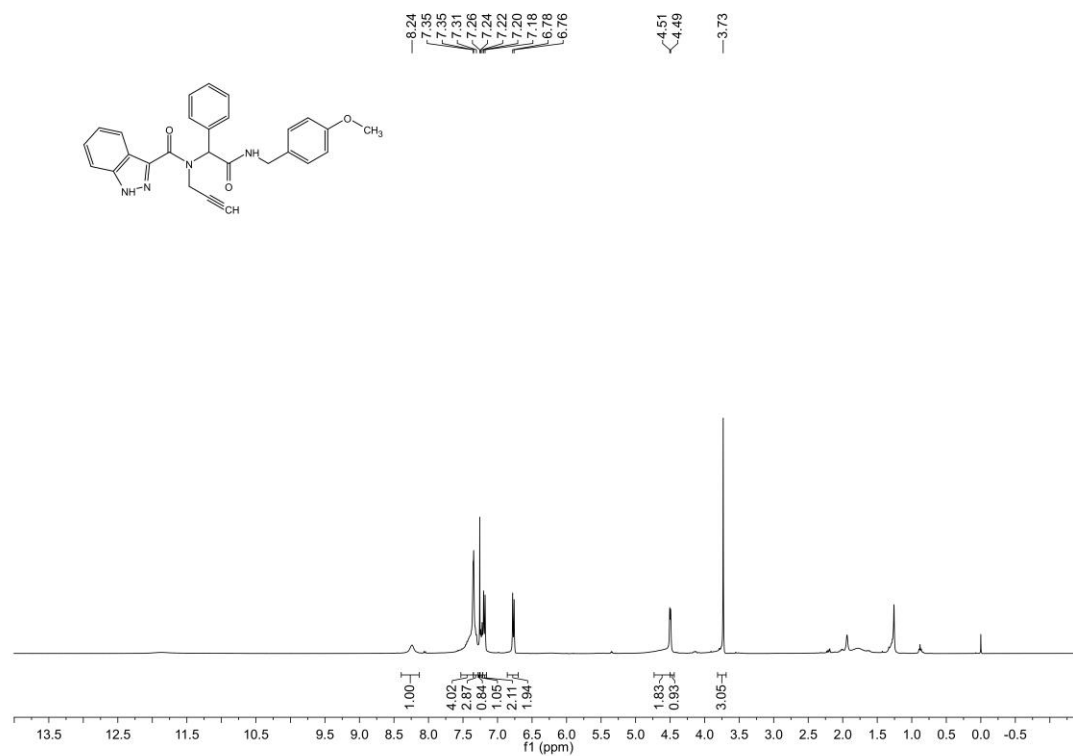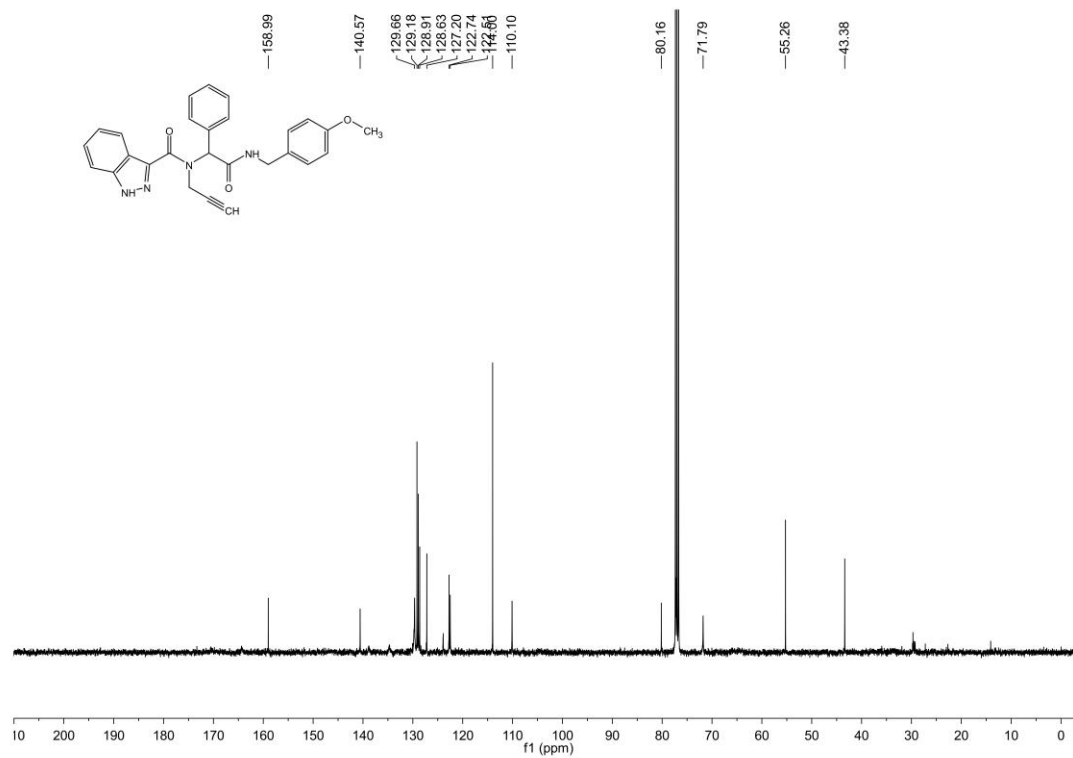

Compound **14a**

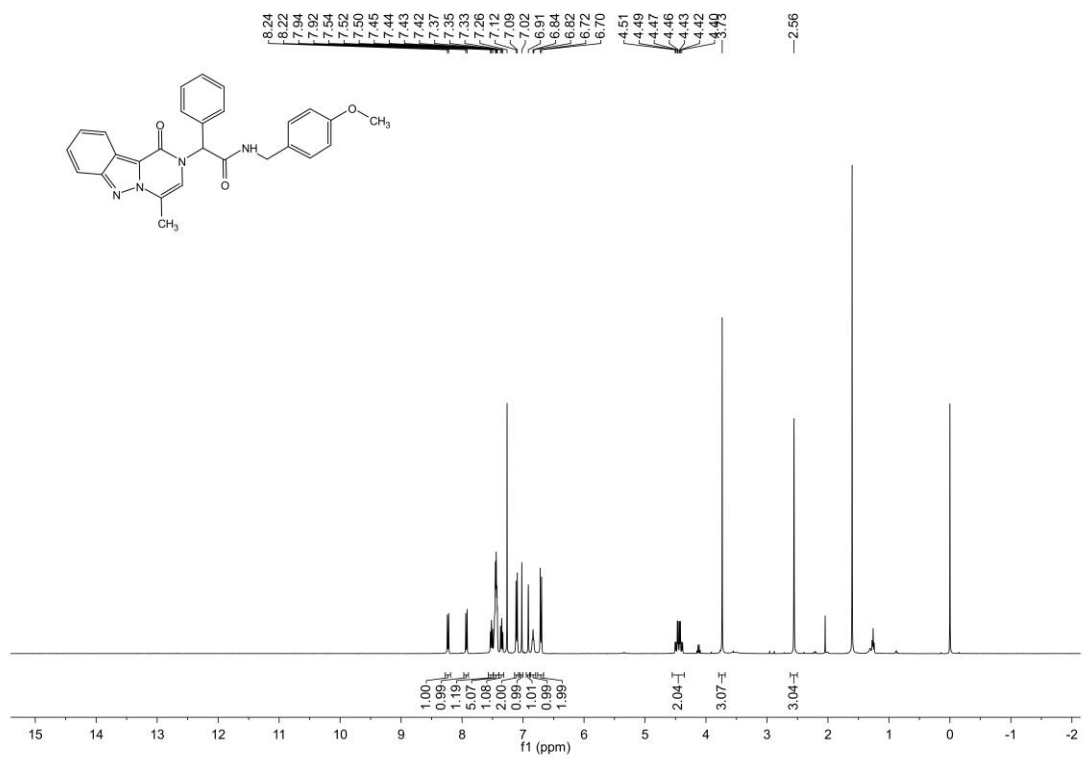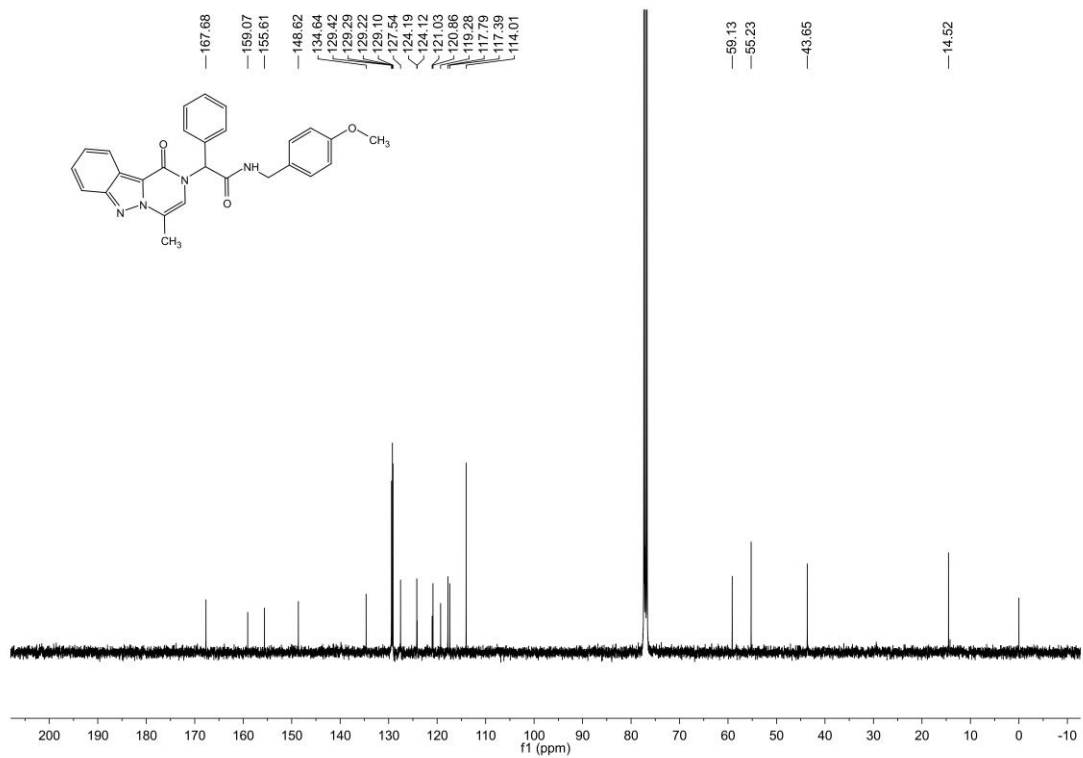

U6-1 #875 RT: 6.40 AV: 1 NL: 4.59E8  
T: FTMS + p ESI Full ms [100.0000-1000.0000]

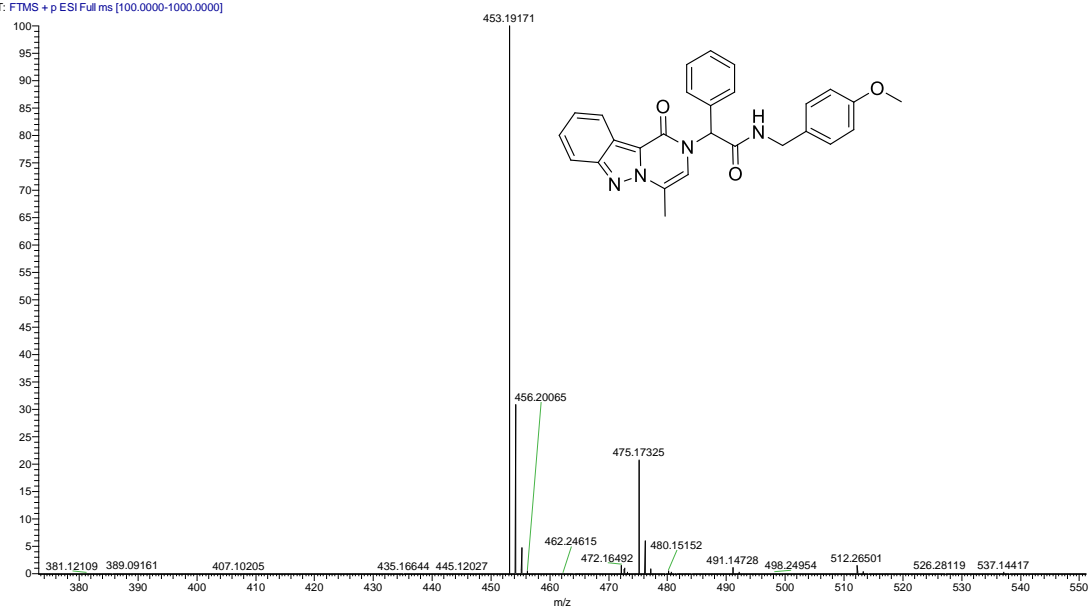

### Compound 14b

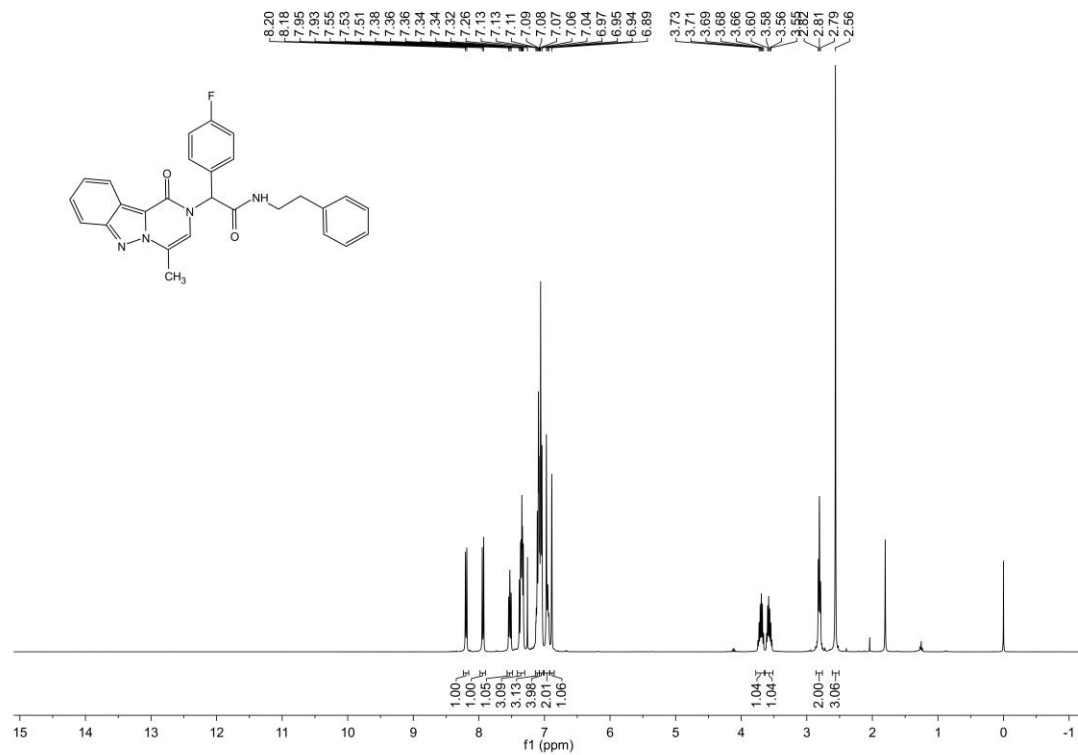

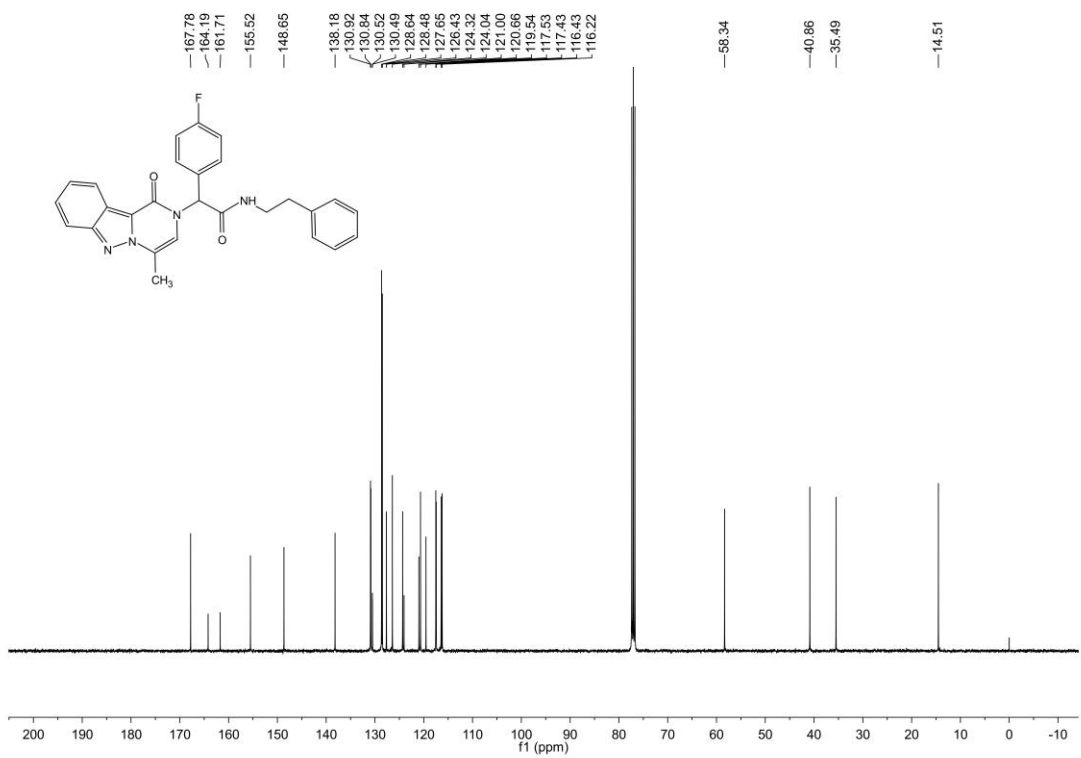

U6-2#914 RT: 6.58 AV: 1 NL: 8.82E8  
T: FTMS + p ESI Full ms [100.0000-1000.0000]

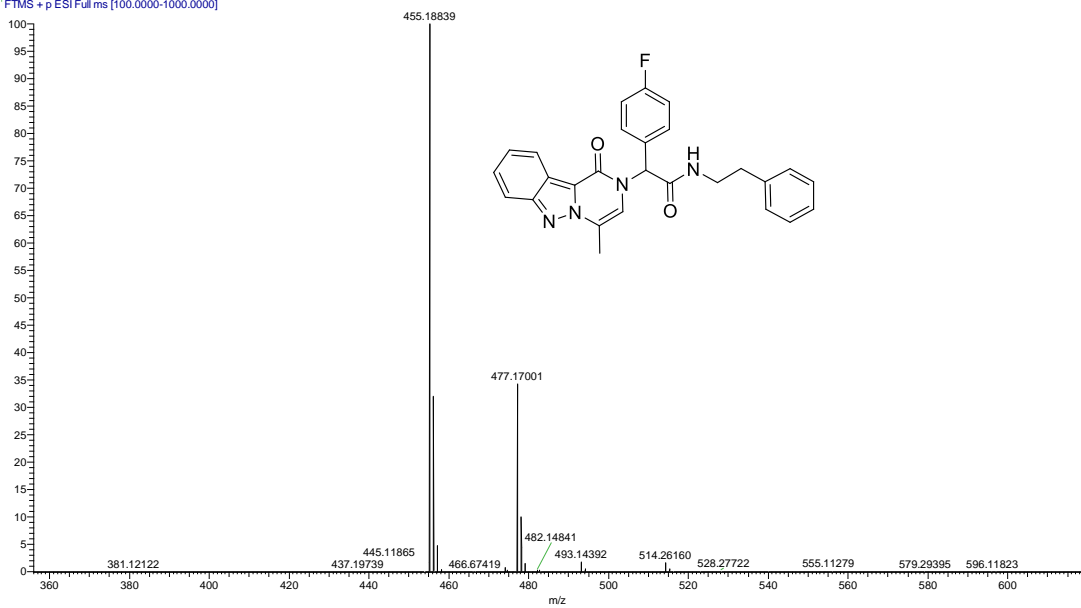

Compound **14c**

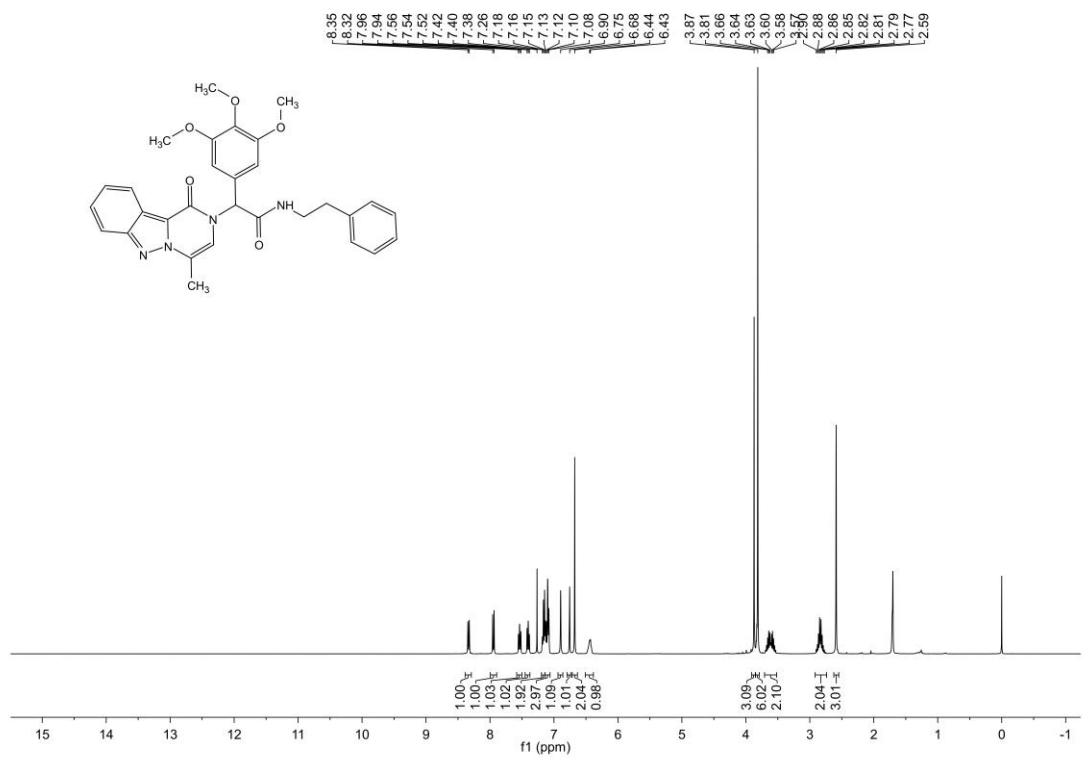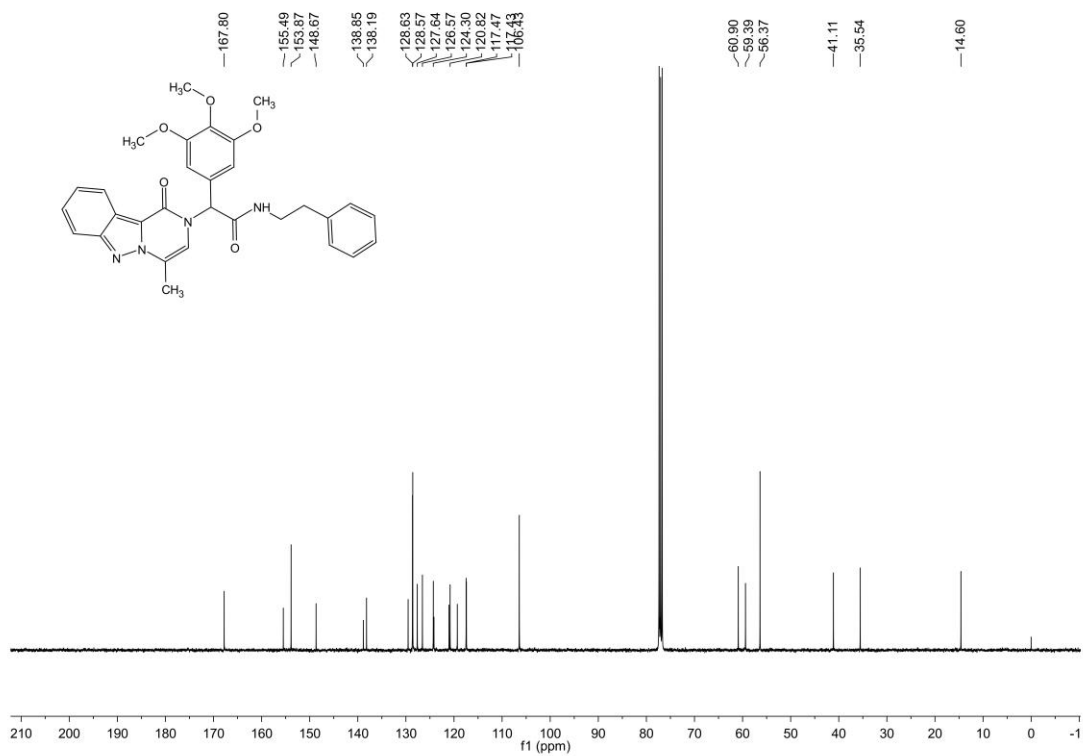

U6-3 #880 RT: 6.38 AV: 1 NL: 9.32E8  
 T: FTMS + p ESI Full ms [100.0000-1000.0000]

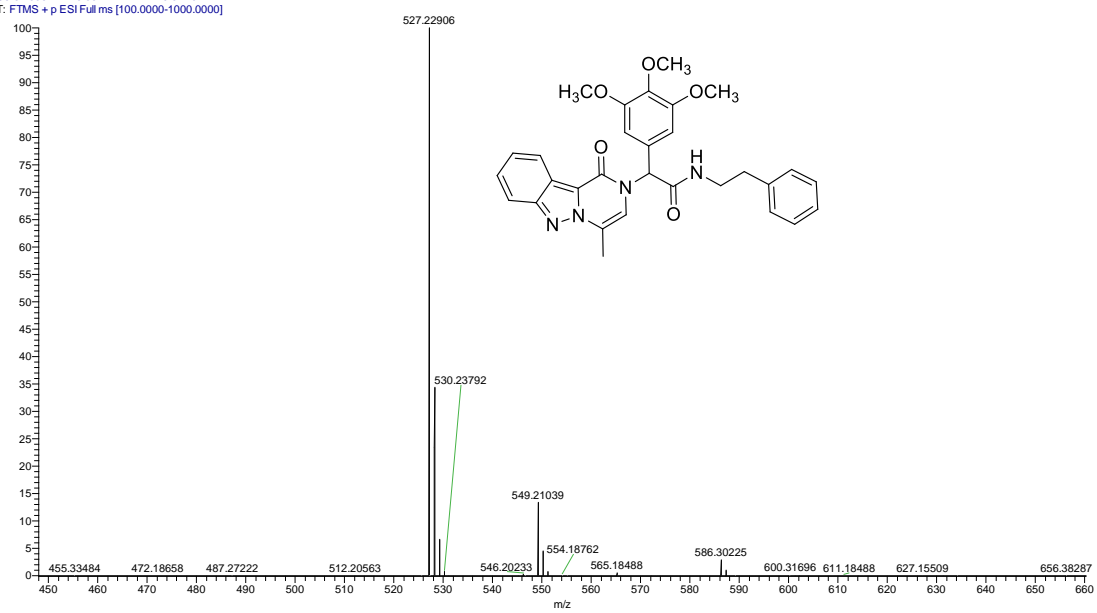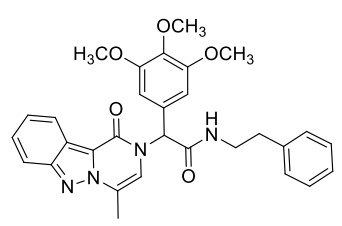

Compound **14d**

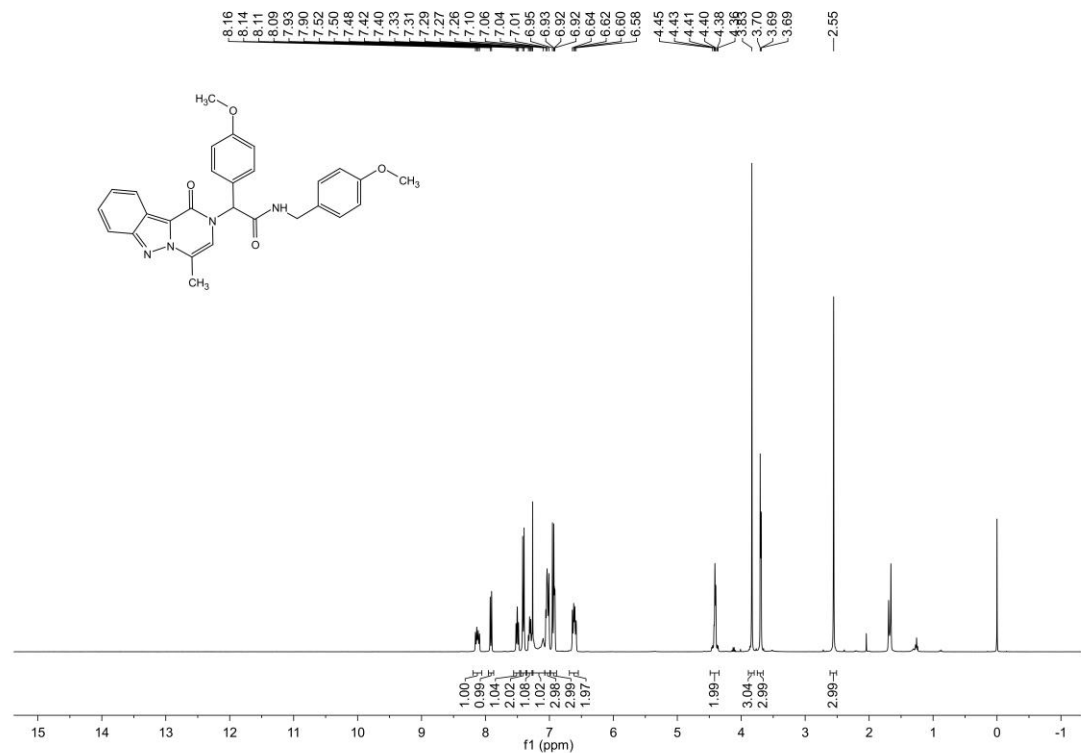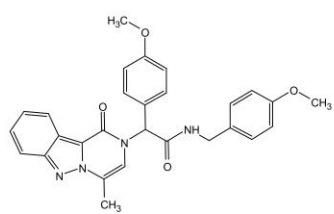

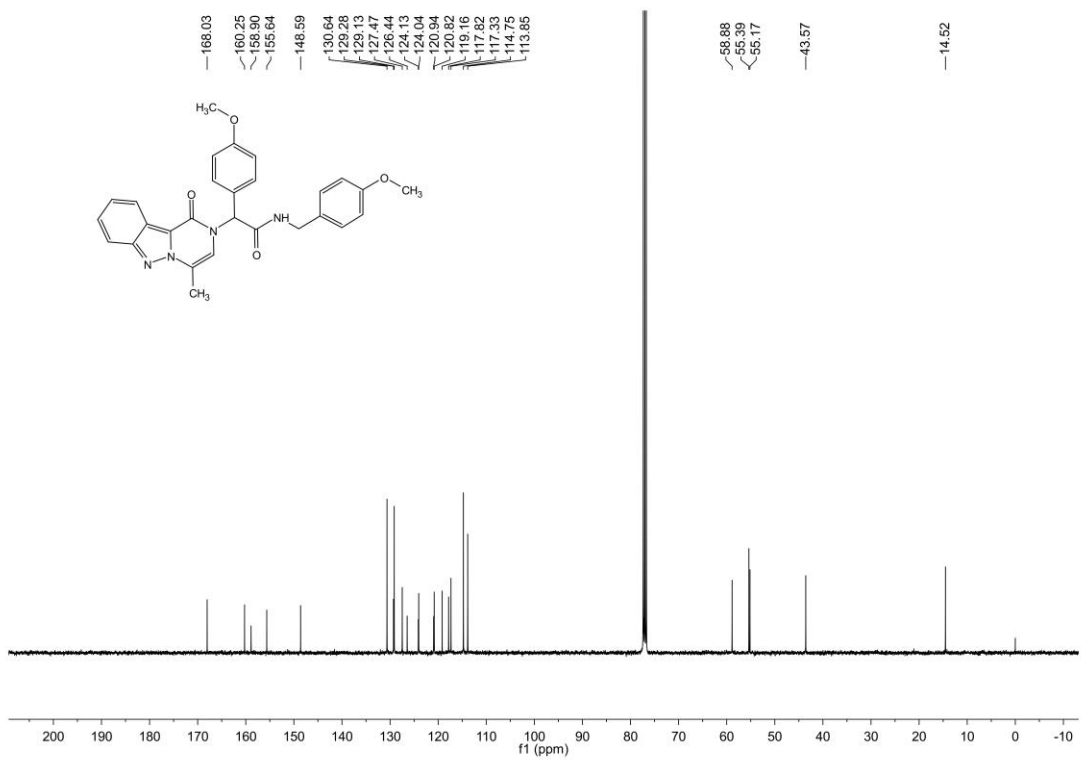

U6-4 #870 RT: 6.37 AV: 1 NL: 2.83E8  
 T: FTMS + p ESI Full ms [100.0000-1000.0000]

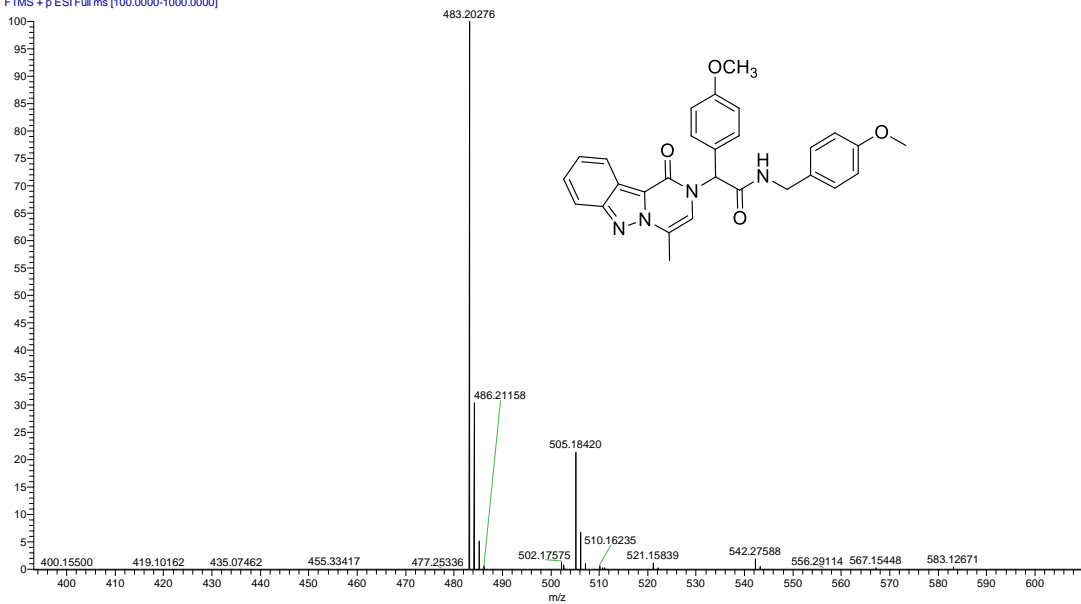



Compound **14e**

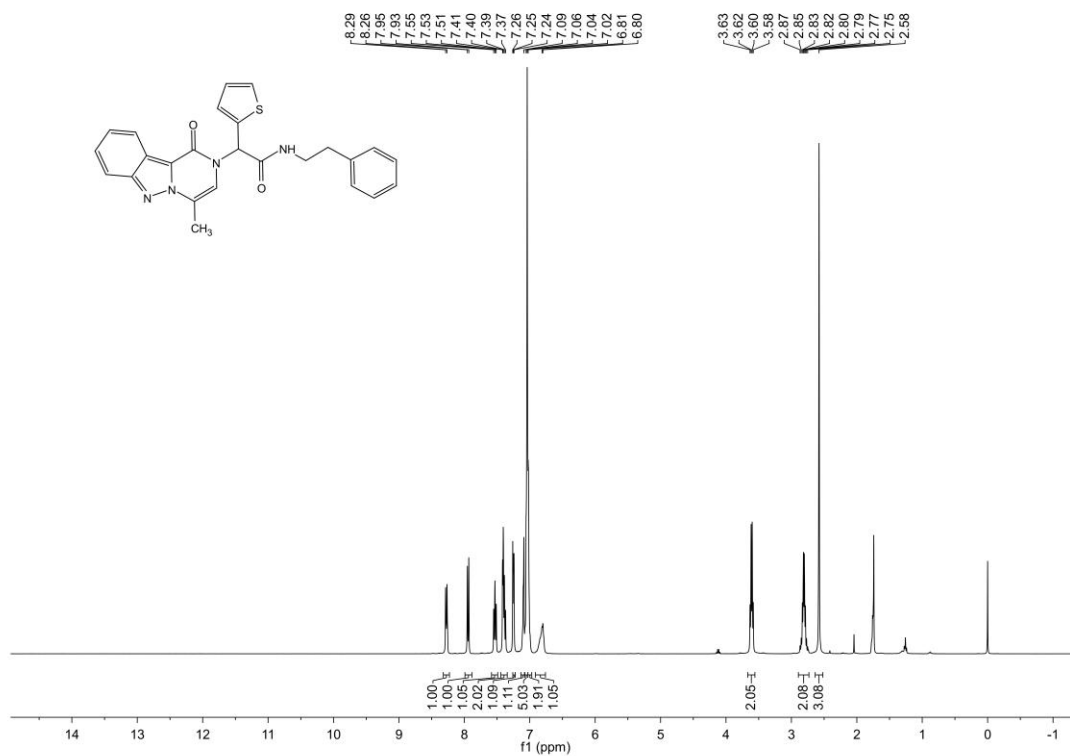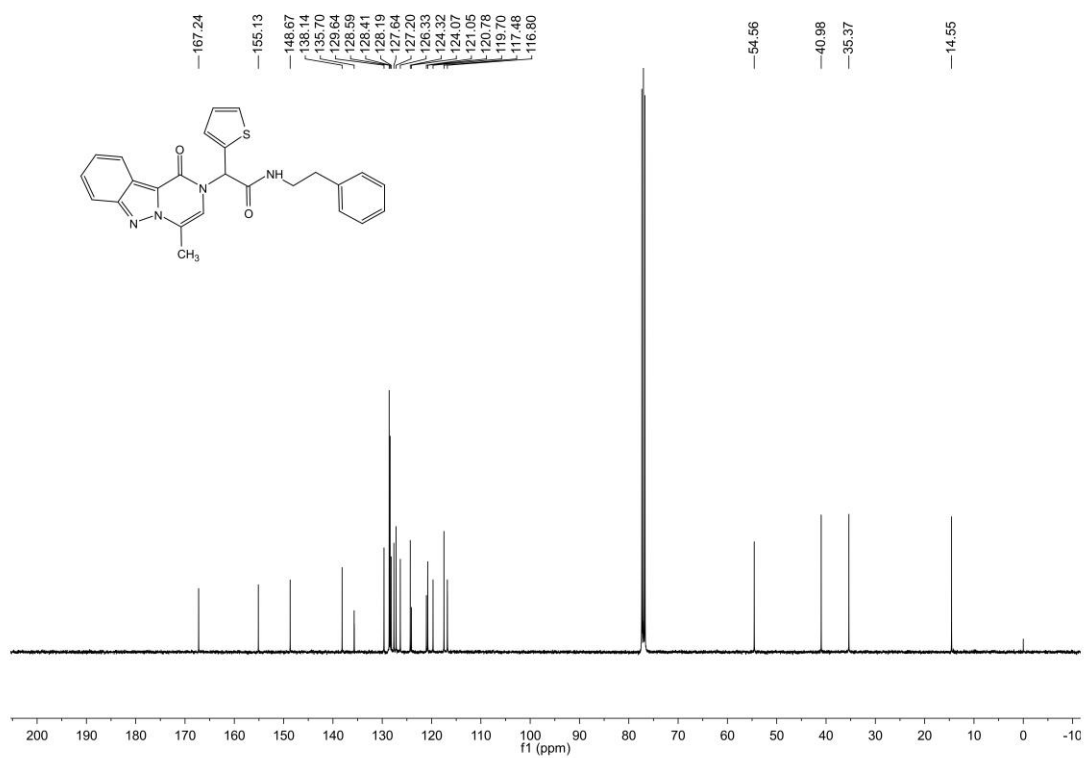

U6-5 #894 RT: 6.52 AV: 1 NL: 1.99E9  
T: FTMS + p ESI Full ms [100.0000-1000.0000]

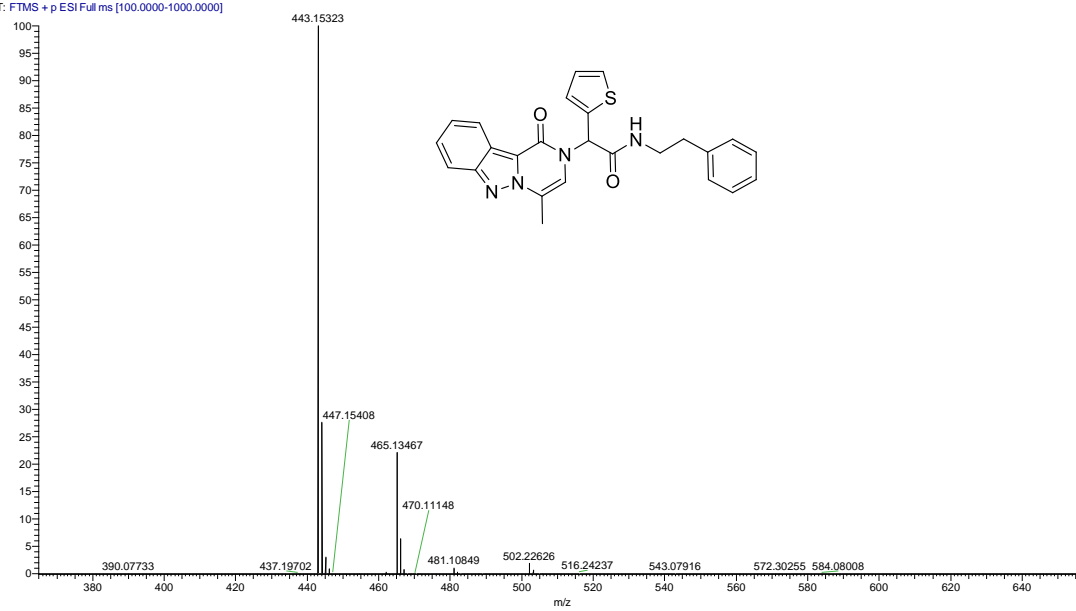

### Compound 14f

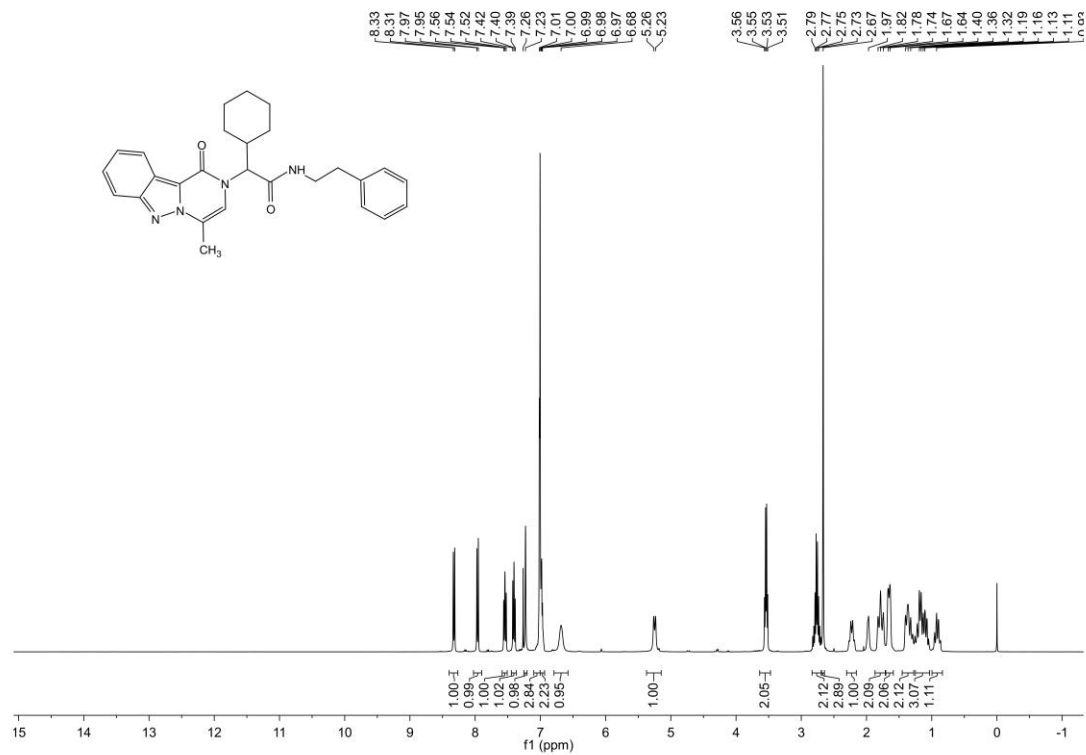

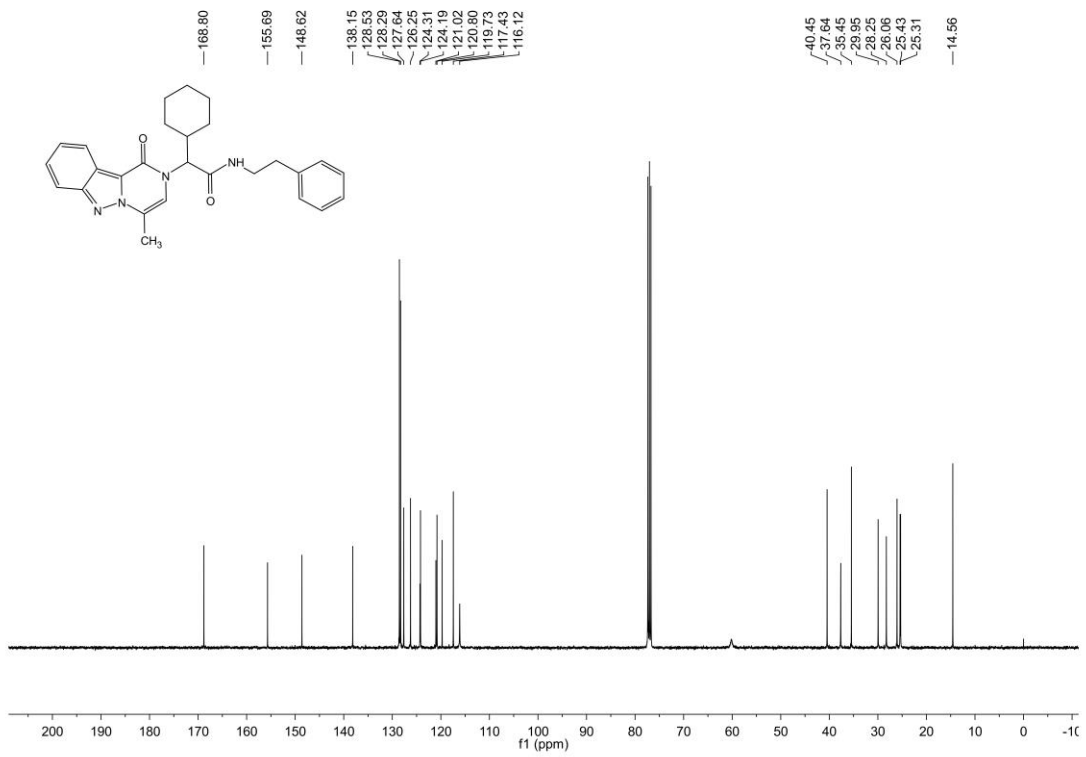

U6-6 #958 RT: 6.97 AV: 1 NL: 1.10E9  
T: FTMS + p ESI Full ms [100.0000-1000.0000]

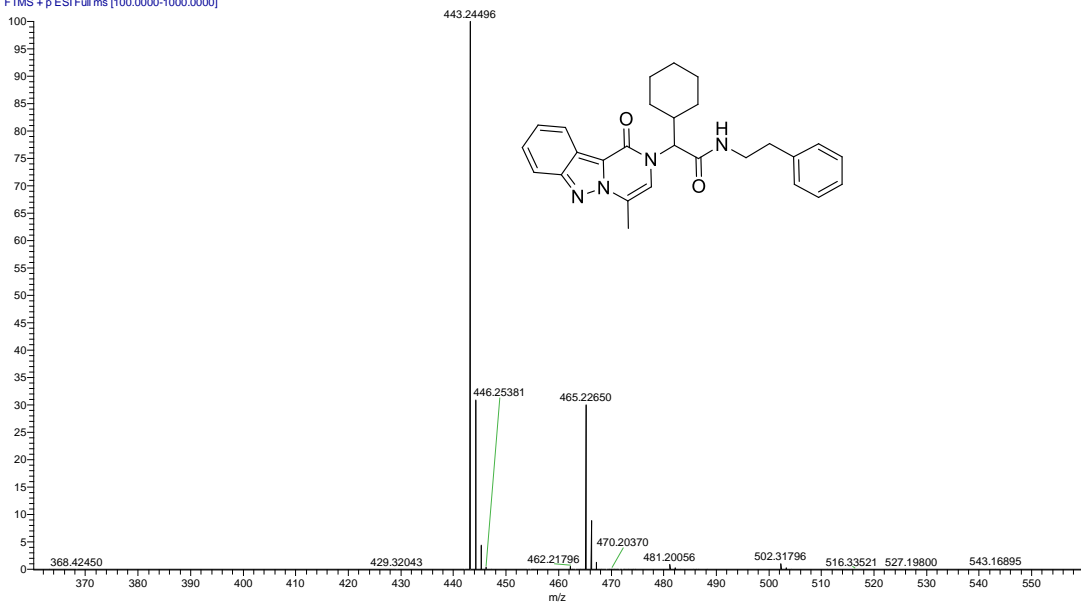

Compound **14g**

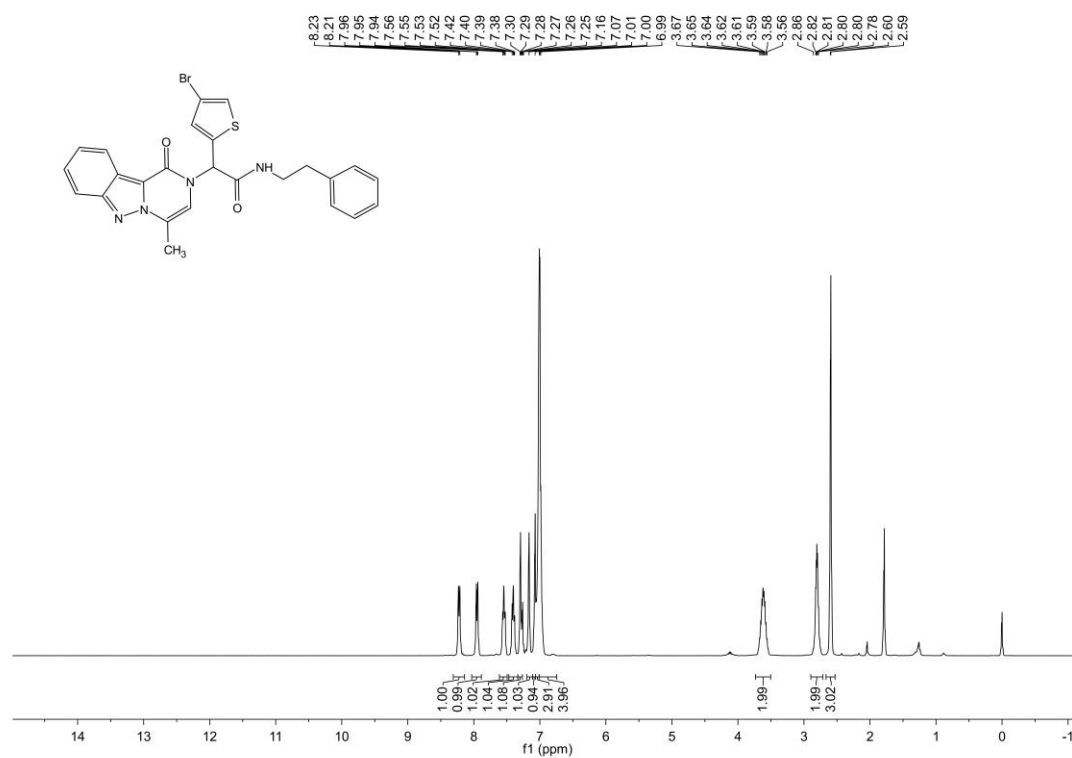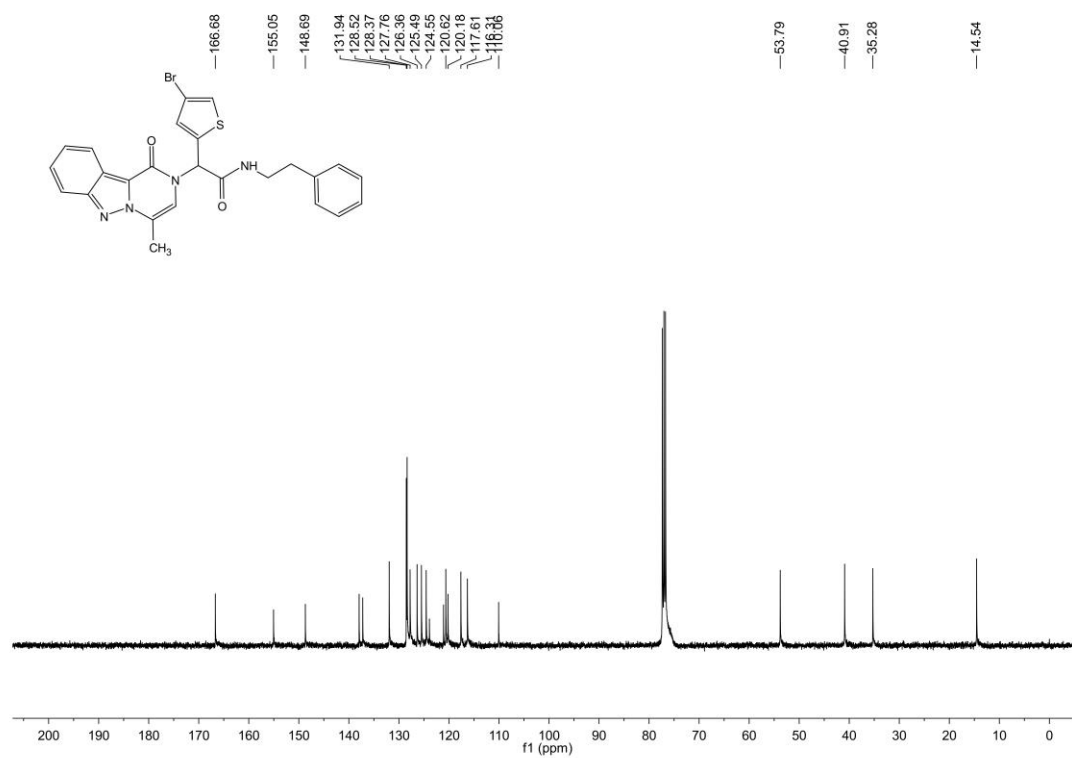

U6-7 #929 RT: 6.82 AV: 1 NL: 1.41E8  
T: FTMS + p ESI Full ms [100.0000-1000.0000]

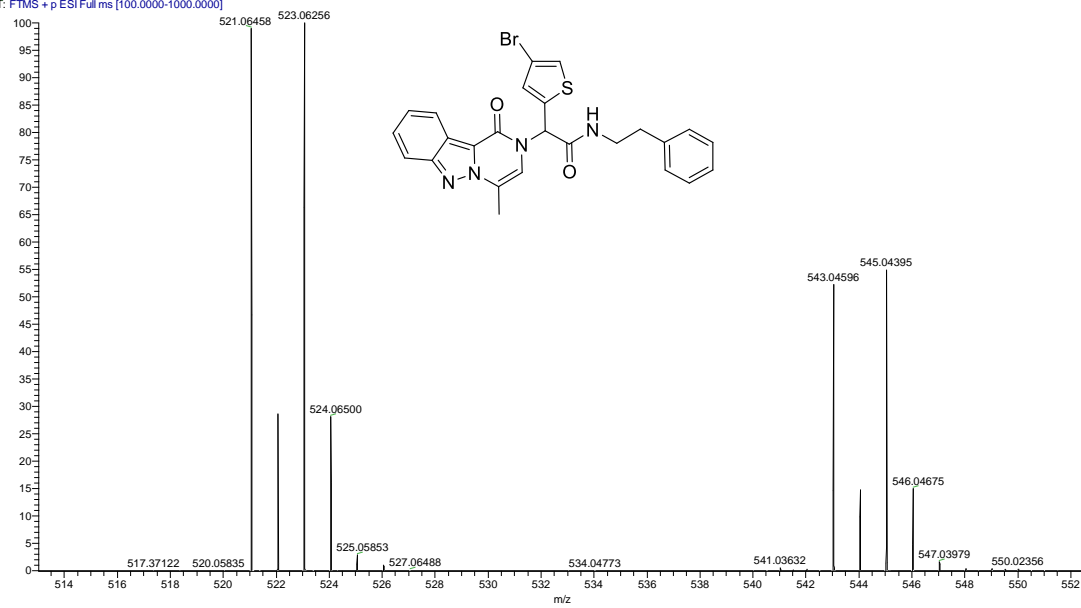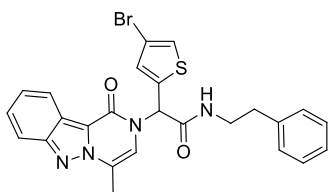

### Compound 14h

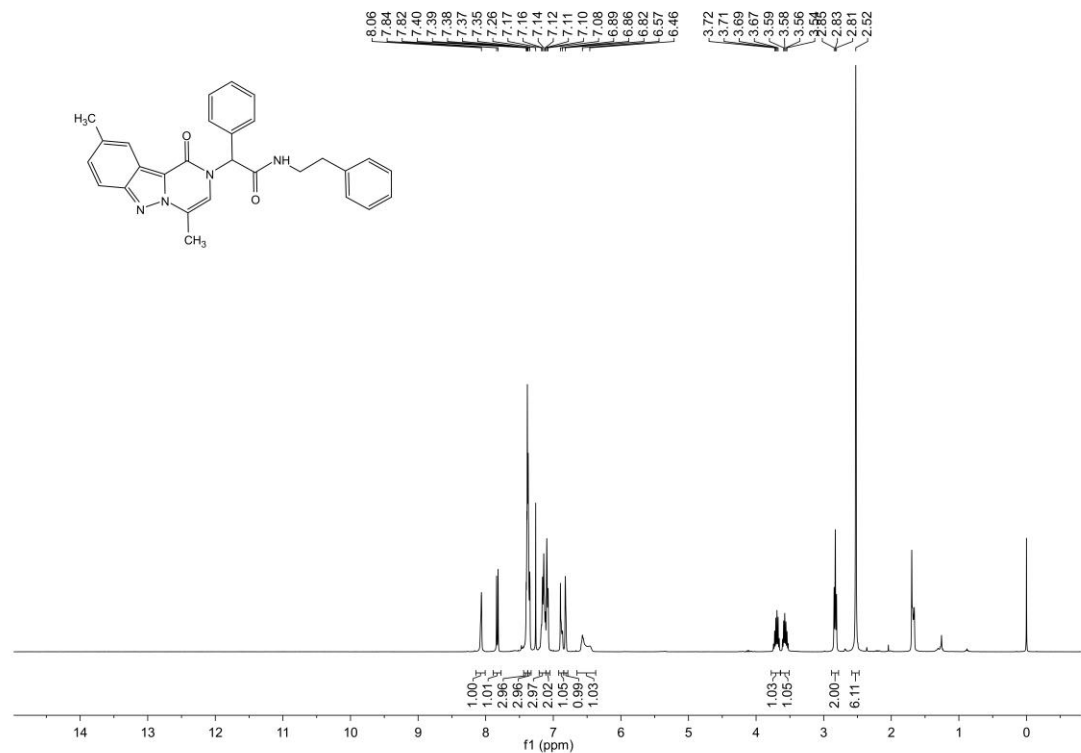

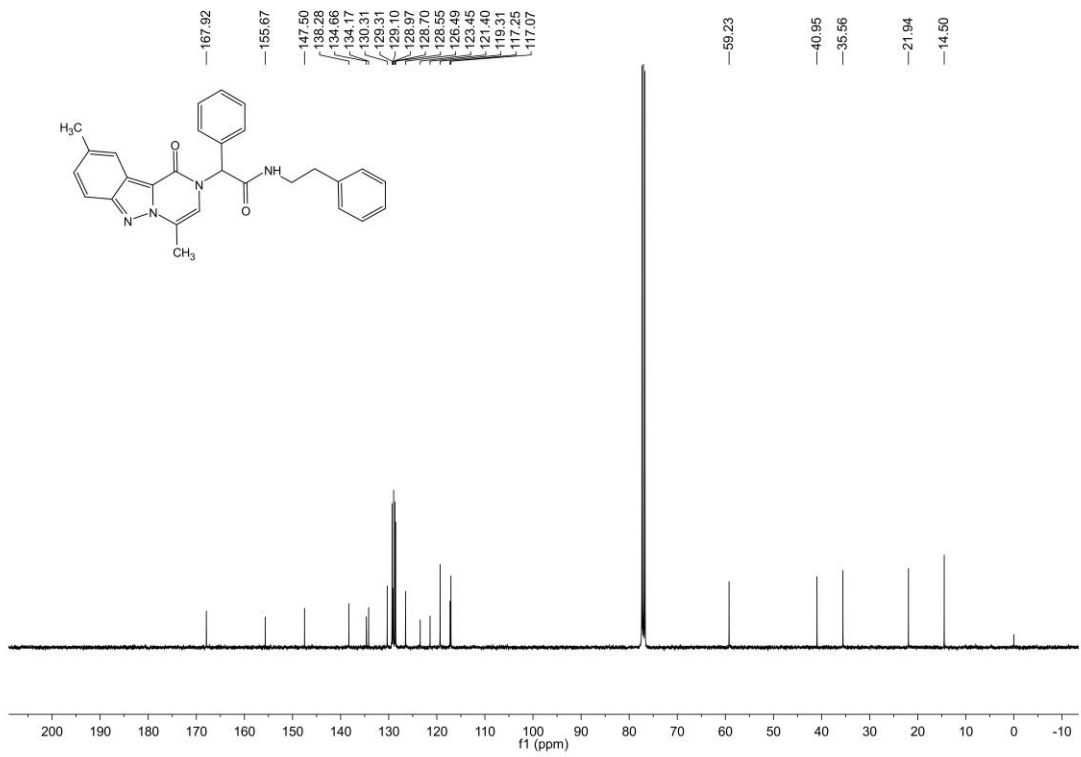

U6-8 #915 RT: 6.69 AV: 1 NL: 1.33E9  
T: FTMS + p ESI Full ms [100.0000-1000.0000]

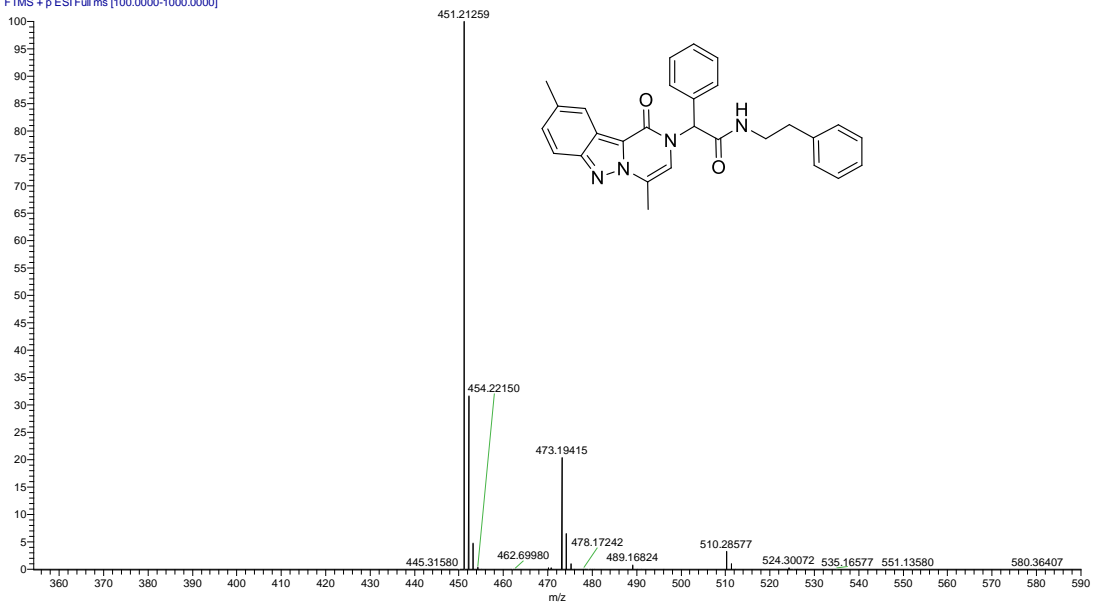

Compound **14i**

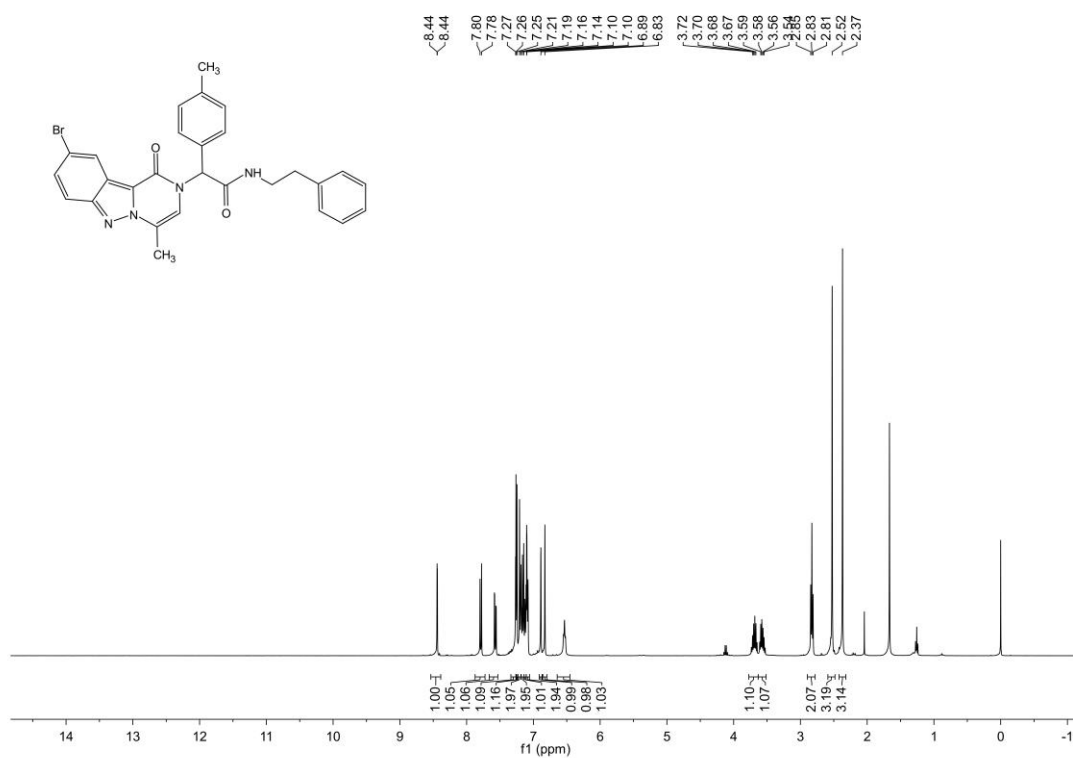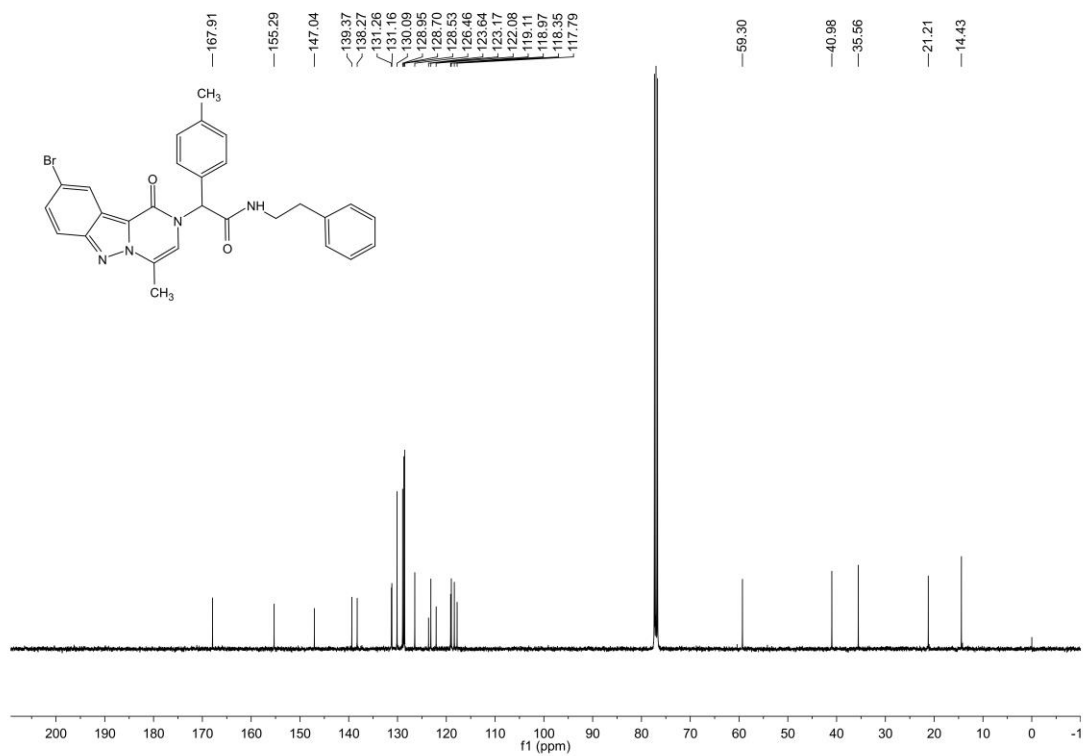





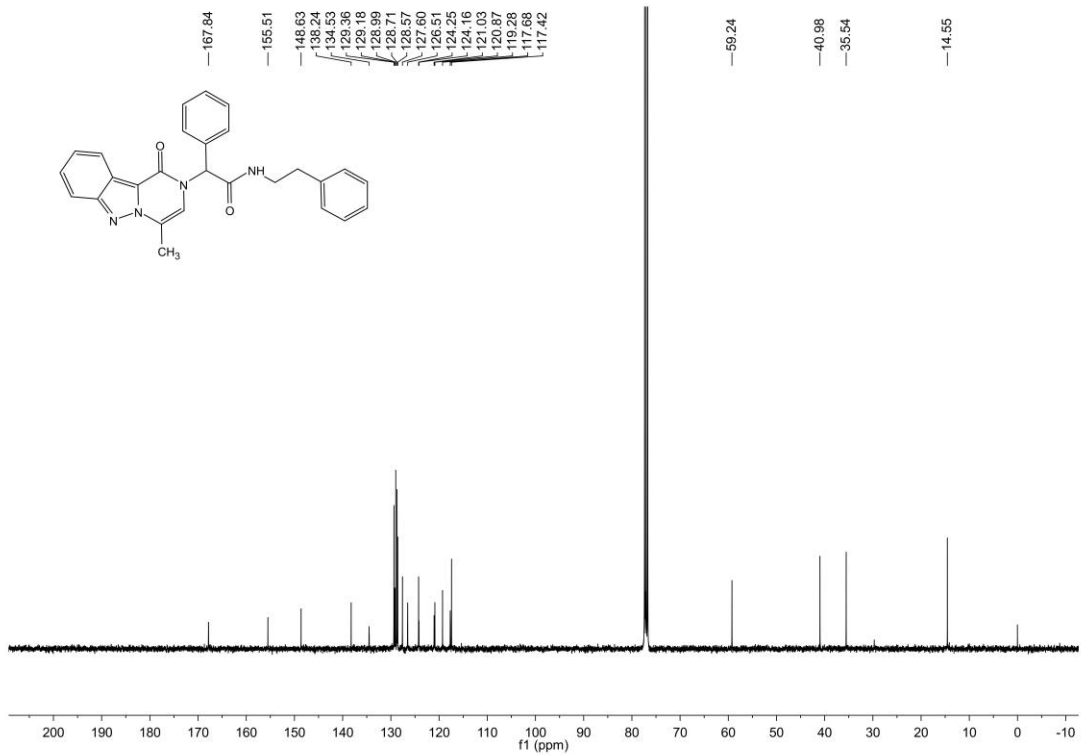

U6-11 #897 RT: 6.57 AV: 1 NL: 8.84E8  
T: FTMS + p ESI Full ms [100.0000-1000.0000]

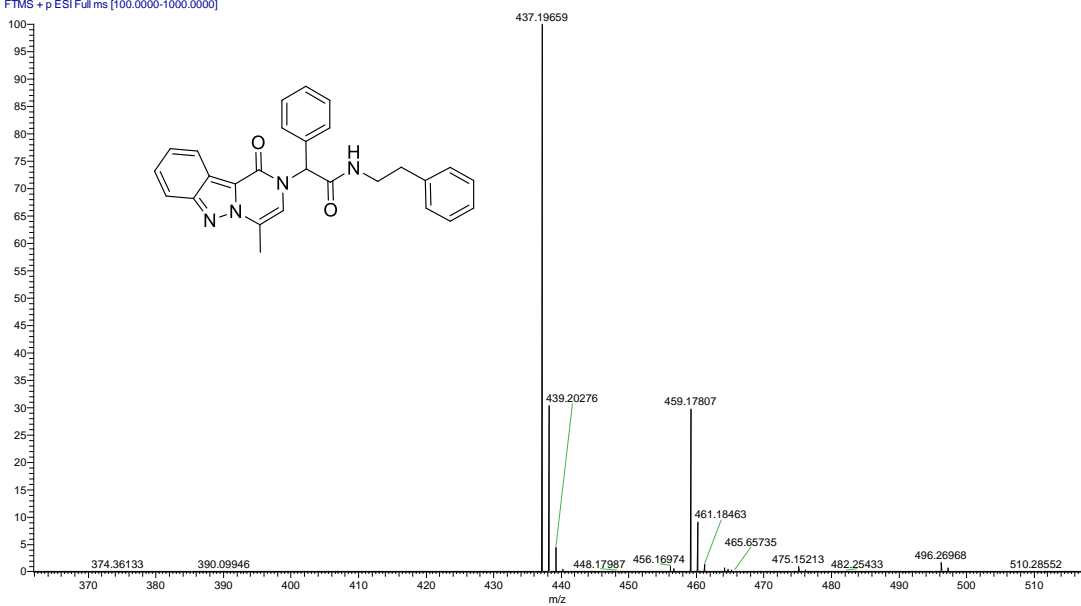

Supplement: 41598_2020_66137_MOESM1_ESM.pdf [file 41598_2020_66137_MOESM1_ESM.pdf]
